# 1 ***Cis*-regulatory basis of sister cell type divergence in the vertebrate retina**

2 Daniel Murphy<sup>1</sup>, Andrew. E.O., Hughes<sup>1</sup>, Karen A. Lawrence<sup>1,2</sup>, Connie A. Myers<sup>1</sup> and Joseph C. Corbo<sup>1</sup>

3

4 <sup>1</sup>Department of Pathology and Immunology, Washington University School of Medicine, St. Louis, MO

5 <sup>2</sup>Current Address: College of Social Work, University of Kentucky, Lexington, KY 40506

6

## 7 **Abstract**

8 Multicellular organisms evolved via repeated functional divergence of transcriptionally related sister cell  
9 types, but the mechanisms underlying sister cell type divergence are not well understood. Here, we study a  
10 canonical pair of sister cell types, retinal photoreceptors and bipolar cells, to identify the key *cis*-regulatory  
11 features that distinguish them. By comparing open chromatin maps and transcriptomic profiles, we found  
12 that while photoreceptor and bipolar cells have divergent transcriptomes, they share remarkably similar *cis*-  
13 regulatory grammars, marked by enrichment of K50 homeodomain binding sites. However, cell class-  
14 specific enhancers are distinguished by enrichment of E-box motifs in bipolar cells, and Q50 homeodomain  
15 motifs in photoreceptors. We show that converting K50 motifs to Q50 motifs represses reporter expression  
16 in bipolar cells, while photoreceptor expression is maintained. These findings suggest that partitioning of  
17 Q50 motifs within cell type-specific *cis*-regulatory elements was a critical step in the divergence of the  
18 bipolar transcriptome from that of photoreceptors.

19

20

21

22

23

24

25

## 26 **Introduction**

27           Complex tissues require the coordinated activity of a wide array of specialized cell types. It has  
28 been proposed that cell type diversity arises in the course of evolution through a ‘division of labor’ process,  
29 in which a multifunctional ancestral cell type gives rise to descendant cell types with divergent and novel  
30 functions<sup>1,2</sup>. Such descendants are often referred to as ‘sister’ cell types, and typically share a range of  
31 morphological, functional, and transcriptional features while at the same time displaying key differences<sup>3,4</sup>.  
32 A canonical example of sister cell types are mammalian retinal photoreceptors and bipolar cells<sup>5,6</sup>. In a  
33 typical vertebrate retina, photoreceptors synapse onto bipolar cells, which, in turn, synapse onto retinal  
34 ganglion cells that send their axons to the brain. Bipolar cells therefore constitute the central interneuronal  
35 cell class in the vertebrate retina. In mice, an array of 15 distinct bipolar cell types, broadly categorized as  
36 ON and OFF based on their response to light onset/offset, serve as a scaffold upon which the complex  
37 information-processing circuitry of the retina is built<sup>7</sup>. In this paper, we refer to photoreceptors and bipolar  
38 cells as cell ‘classes’, since they each comprise multiple distinct cell types.

39           During retinal development, photoreceptors and bipolar cells arise from the same population of  
40 OTX2-expressing progenitor cells<sup>8-10</sup>, share a similar elongate morphology<sup>6</sup>, and possess the molecular  
41 machinery required for ribbon synapse formation, a structure not found in any other retinal cell class<sup>11</sup>. In  
42 some vertebrate species, a subset of bipolar cells exhibit additional photoreceptor-like features, including  
43 localization of their cell bodies in the outer nuclear layer<sup>12</sup> and the presence of an inner segment-like  
44 structure known as Landolt’s club, which extends from the dendrite to the outer limiting membrane and  
45 contains a 9+0 cilium<sup>13-15</sup>. These ‘transitional’ cell types point to the evolutionary origin of bipolar cells  
46 from photoreceptors<sup>5,6</sup>.

47           Both shared and divergent features of sister cell types are mediated by the transcriptional regulatory  
48 networks that govern gene expression in each cell type. In vertebrates, photoreceptors and bipolar cells  
49 express the paired-type homeodomain (HD) TFs CRX and OTX2, which are master regulators of gene  
50 expression in both cell classes<sup>16-19</sup>. A third paired-type HD TF, VSX2, is expressed specifically in bipolar  
51 cells and is required for bipolar fate<sup>20,21</sup>. Paired-type homeodomains recognize a core ‘TAAT’ motif, with

52 additional specificity conferred by amino acids in positions 47, 50, and 54 of the homeodomain<sup>22-24</sup> In  
53 particular, a lysine at position 50 (K50, as found in CRX and OTX2) favors recognition of TAATCC,  
54 whereas a glutamine (Q50, as found in VSX2) favors recognition of TAATT<sup>A/G</sup>. Thus, substitution of a  
55 single amino acid in the HD toggles the TF's binding preference for the nucleotides 3' of the TAAT core<sup>22</sup>.  
56 Various bHLH TFs, which recognize E-box motifs (CANNTG), also play important roles in photoreceptor  
57 and bipolar cell gene expression programs. For instance, the bHLH TFs ASCL1 and NEUROD4 are  
58 required for the development of both photoreceptors and bipolar cells<sup>25</sup>. Similarly, NEUROD1 is required  
59 for photoreceptor survival, and BHLHE22 and BHLHE23 are required for development of OFF cone  
60 bipolar cells and rod bipolar cells, respectively<sup>26-29</sup>.

61 Our lab has previously shown that the *cis*-regulatory elements (CREs; i.e., enhancers and  
62 promoters) of mouse rods and cones are strongly enriched for K50 HD motifs as well as moderately  
63 enriched for Q50 HD and E-box motifs<sup>30</sup>. In addition, we recently used a massively parallel reporter assay  
64 to analyze the activity of thousands of photoreceptor enhancers identified by CRX ChIP-seq and found that  
65 both K50 HD and E-box motifs are positively correlated with enhancer activity in photoreceptors while  
66 Q50 HD motifs have a weakly negative correlation with enhancer activity<sup>31</sup>. In contrast, studies of  
67 individual reporters have shown that Q50 HD motifs mediate weak activation of expression via RAX, and  
68 that RAX can either enhance or suppress the transactivation activity of CRX, depending upon RAX  
69 expression levels<sup>32,33</sup>. Thus, Q50 HD motifs appear to have both positive and negative effects of  
70 photoreceptor enhancer activity, depending on context. In contrast, Q50 motifs in bipolar cells appear to be  
71 strongly repressive when bound by VSX2, which has been proposed to inhibit the expression of  
72 photoreceptor genes in bipolar cells<sup>20,34,35</sup>. The opposing effects on transcriptional activity mediated by K50  
73 and Q50 motifs suggests that even subtle changes in HD binding sites may mediate major differences in  
74 gene expression. Indeed, a recent study in *Drosophila* showed that single base pair substitutions that  
75 interconvert Q50 and K50 half-sites within dimeric motifs are sufficient to switch the specificity of opsin  
76 expression within photoreceptor sub-types<sup>36</sup>.

77           Photoreceptors and bipolar cells offer an attractive model system in which to examine the  
78 mechanisms of *cis*-regulatory divergence in evolution and development, but the *cis*-regulatory landscape  
79 of bipolar cells is currently unknown. To elucidate the *cis*-regulatory grammar of bipolar cells we used  
80 FACS to isolate bipolar cell populations from mouse retina and obtain profiles of open chromatin and gene  
81 expression. By comparing these datasets to matching data from mouse rod and cone photoreceptors we  
82 found differential enrichment of Q50 motifs in photoreceptor-specific enhancers and a corresponding  
83 enrichment of E-boxes in bipolar-specific enhancers. We propose that the differential partitioning of Q50  
84 motifs in photoreceptor and bipolar enhancers was a key evolutionary innovation contributing to  
85 transcriptomic divergence between the two cell classes.

86

## 87 **Results**

### 88 *Photoreceptors and bipolar cells exhibit divergent transcriptional profiles*

89           To obtain cell class-specific transcriptome profiles of mouse bipolar cells we used fluorescence-  
90 activated cell sorting (FACS) to purify bipolar cell populations from adult mice. We first isolated all bipolar  
91 cells using *Otx2*-GFP mice. This line harbors a GFP cassette knocked into the endogenous *Otx2* locus<sup>37</sup>.  
92 Adult *Otx2*-GFP mice display high-level GFP in bipolar cells and low-level expression in photoreceptors  
93 (Fig. 1B). To purify ON and OFF bipolar cells separately, we crossed *Otx2*-GFP mice with a *Grm6*-YFP  
94 line, in which YFP is driven by the *Grm6* promoter and expressed only in ON bipolar cells<sup>38</sup>. In the double  
95 transgenic mice (*Otx2*-GFP<sup>+</sup>; *Grm6*-YFP<sup>+</sup>) ON bipolar cells co-express GFP and YFP and can be separated  
96 from OFF bipolar cells based on fluorescence intensity (Fig. 1B). We subjected OFF bipolar cells to a  
97 second round of sorting to maximize purity from the adjacent weakly fluorescent photoreceptor population.  
98 Purity of bipolar cell populations was confirmed by qPCR which showed enrichment of ON- and OFF-  
99 specific genes in their respective populations and depletion of markers for other retinal cell classes as

100 compared to whole retina (Fig. 1C). We then used RNA-seq to profile gene expression in purified  
 101 populations of bipolar cells (Fig. S1).

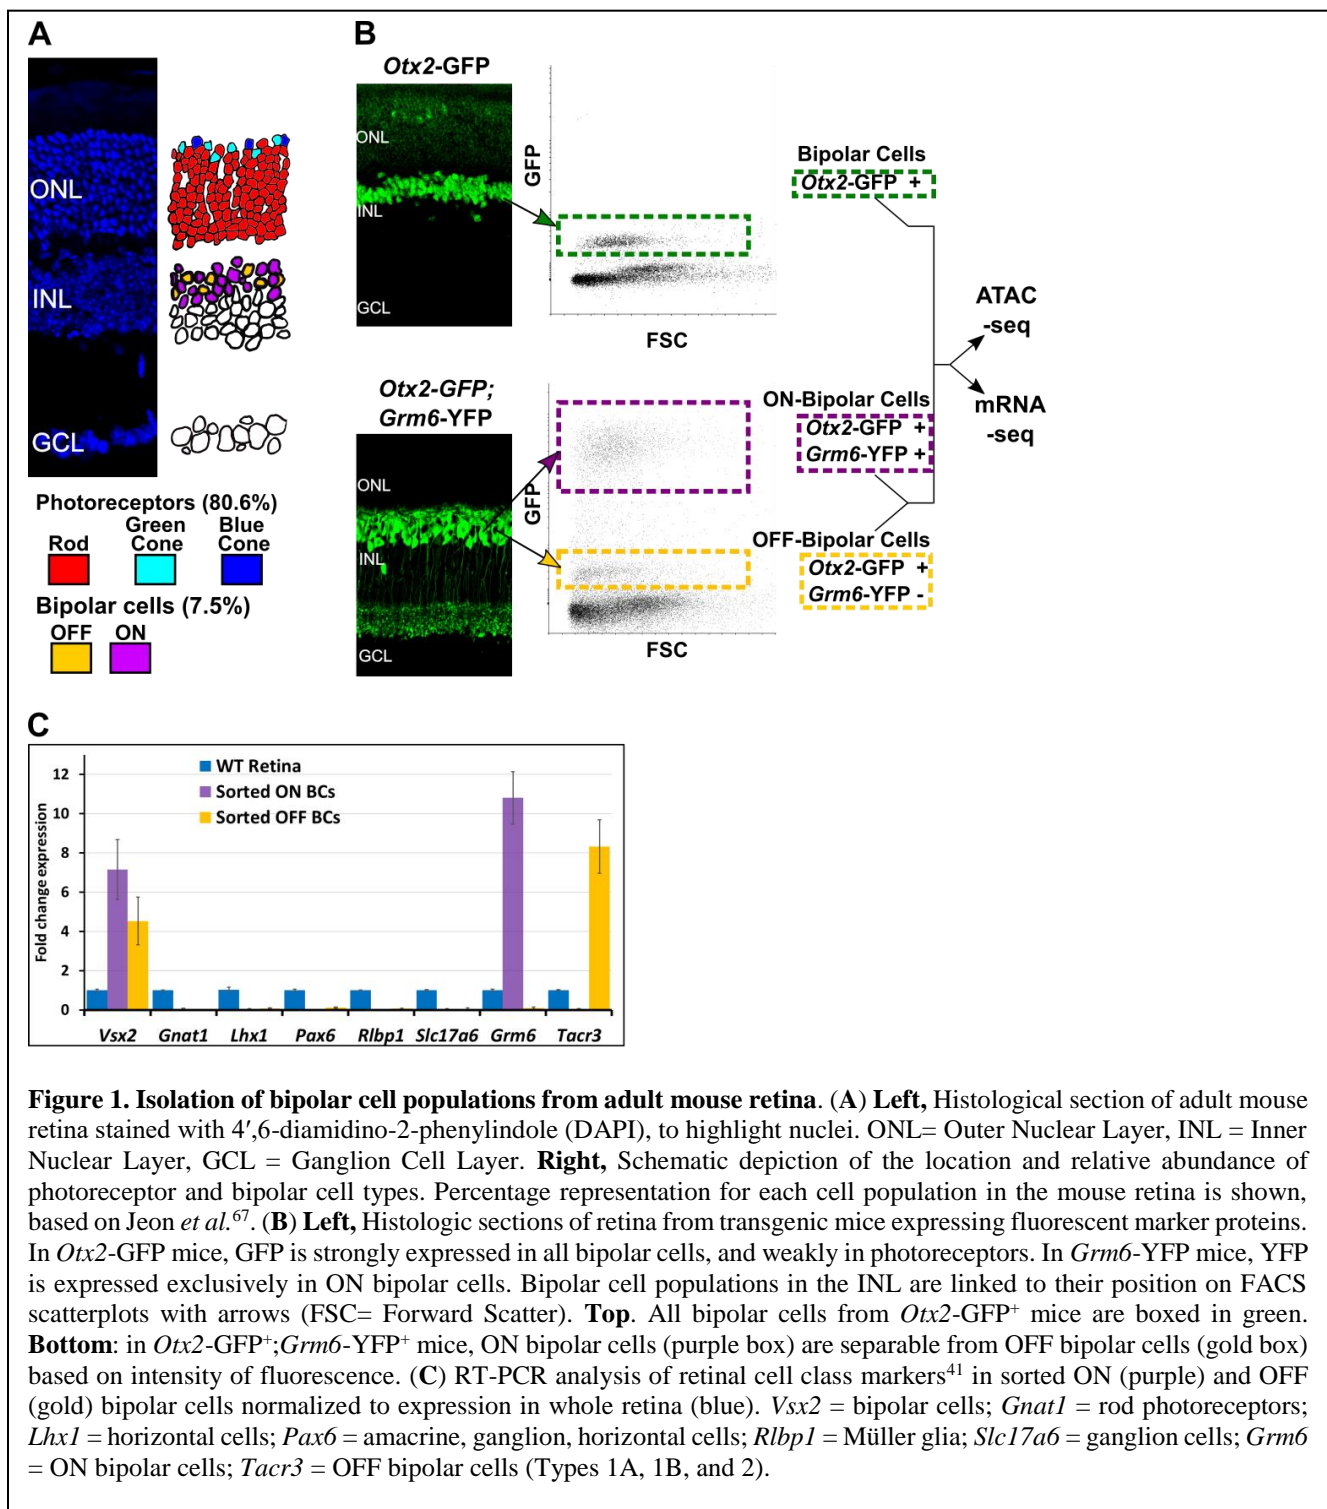

102 To define the transcriptional differences between photoreceptor and bipolar cells we compared  
103 RNA-seq data from bipolar cells to similar data from wild-type rods and *Nrl*<sup>-/-</sup> photoreceptors previously  
104 generated in our lab. We used *Nrl*<sup>-/-</sup> photoreceptors as a surrogate for blue cones (i.e., *Opn1sw*-expressing  
105 cones), since mouse photoreceptors lacking *Nrl* transdifferentiate into blue cones during development<sup>39,40</sup>.  
106 We identified a total of 5,259 genes with at least a two-fold difference in expression between bipolar cells  
107 and either rods or blue cones (FDR < 0.05) (Table S5). Despite the large number of differentially expressed  
108 genes, published single-cell RNA-seq profiles indicate that the bipolar cell transcriptome is more similar to  
109 that of photoreceptors than to that of any other retinal cell class<sup>41</sup>. To evaluate the functional differences  
110 between photoreceptor and bipolar cell gene expression programs we compared the top ~30% most  
111 differentially expressed genes in each cell class (832 bipolar cell, 818 photoreceptor) using the gene  
112 ontology (GO) analysis tool, PANTHER<sup>42</sup>. Top bipolar-enriched GO terms were typical of many neuronal  
113 cell types and related to aspects of synaptic transmission, while photoreceptor-enriched GO terms mainly  
114 related to light-sensing (Table S6). To identify the transcriptional regulators, we compared the list of  
115 differentially expressed genes to a database of mouse TFs (AnimalTFDB3.0<sup>43</sup>), which revealed that 394 of  
116 the differentially expressed genes encode putative transcriptional regulators (Table S5). These include TFs  
117 known to be responsible for controlling gene expression in rods (*Nrl*, *Nr2e3*, *NeuroD1*), cones (*Thrb*),  
118 bipolar cells (*Vsx2*, *NeuroD4*), or both cell classes (*Crx*). Nearly one-third (176) of differentially expressed  
119 TFs are members of the zinc finger (ZF) family, many of which are more highly enriched in rods compared  
120 to bipolar cells but not in blue cone compared to bipolar cells. Conversely, of the top 10% differentially  
121 expressed TFs, the majority (25 of 35) are more highly expressed in bipolar cells compared to either rods  
122 or cones, and of these, most (16 of 25) are classified as HD, ZF or bHLH. Thus, the transcriptomes of  
123 bipolar cells and photoreceptors are surprisingly divergent, despite functional and morphological  
124 similarities between the two cell classes.

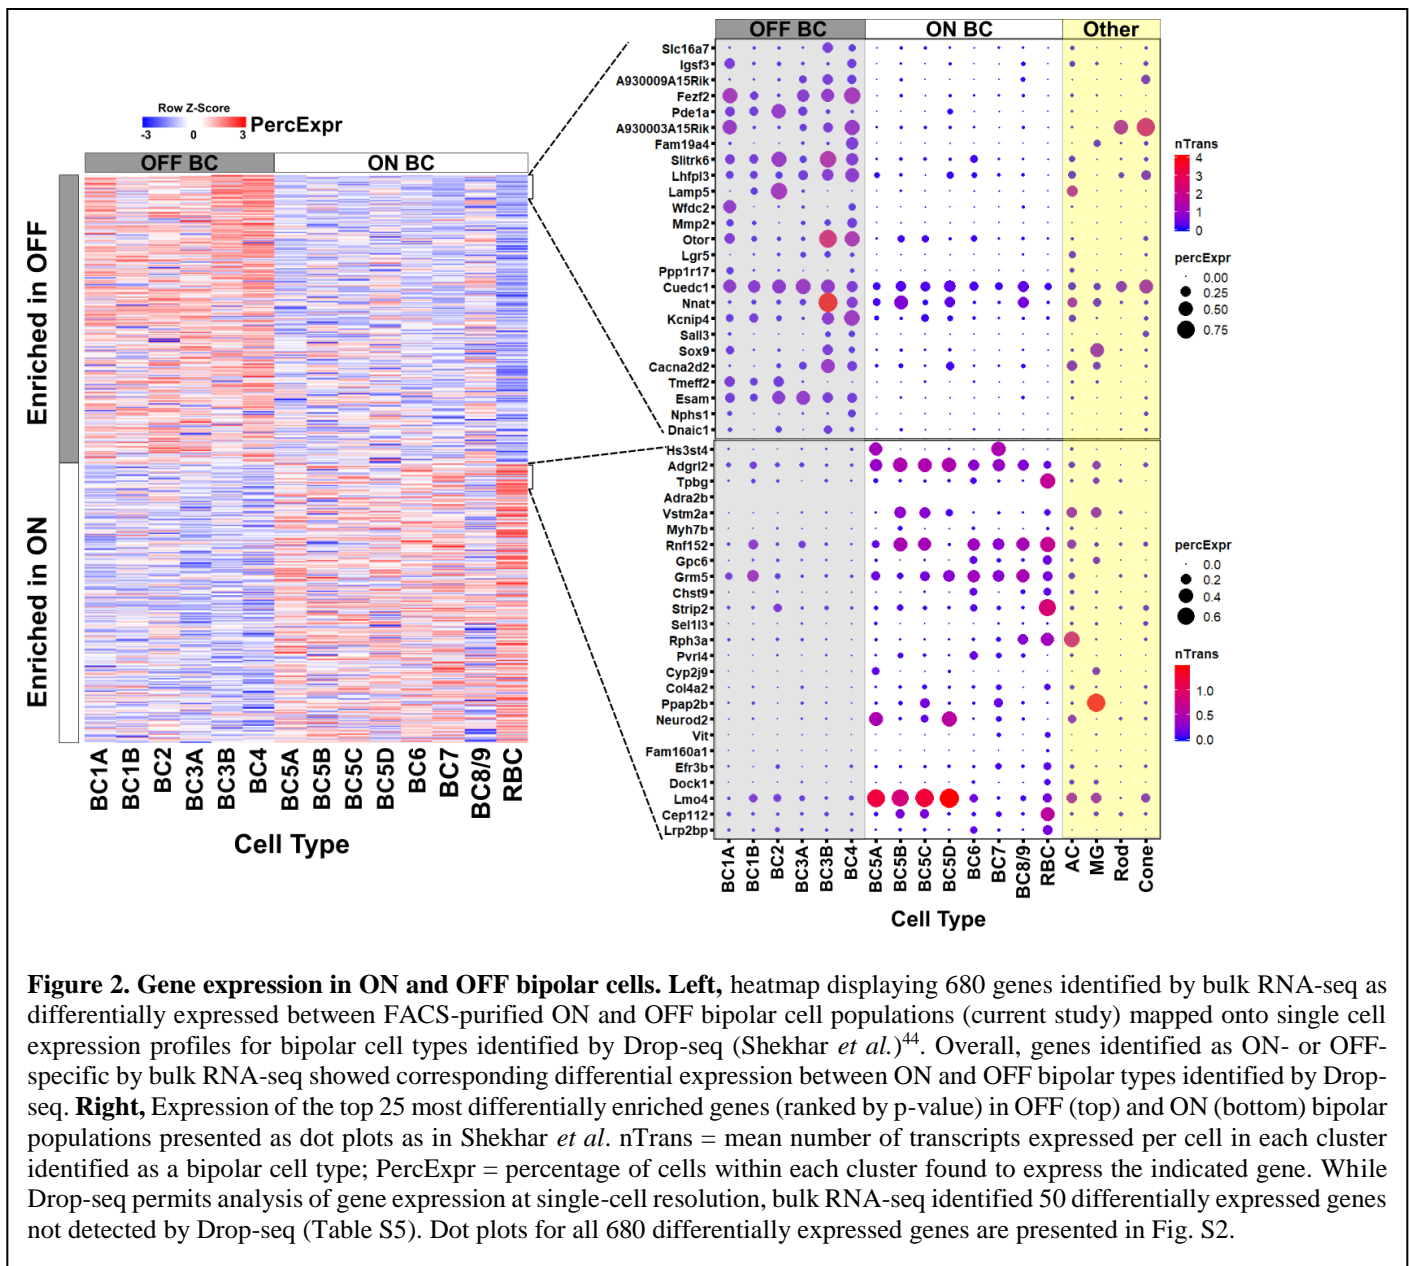

125 In contrast, comparison of the transcriptomes of ON and OFF bipolar cells identified only 680  
 126 genes that were differentially expressed by at least two-fold (317 ON- and 363 OFF-enriched at FDR <  
 127 0.05; Table S5). This figure is less than half of the number of differentially expressed genes identified  
 128 between rods and blue cones (1,471), indicating that the transcriptomes of the two categories of bipolar  
 129 cells are quite similar. A recent study by Shekhar *et al.*, described single-cell expression profiles for bipolar  
 130 cell types using Drop-seq<sup>44</sup>. In order to verify our list of differentially expressed genes and gain insight into  
 131 gene expression among individual bipolar cell types, we compared the list of genes differentially expressed

132 between ON and OFF bipolar cells with the data of Shekhar *et al.* Overall, we found a strong correlation  
133 between the results of bulk ON and OFF bipolar cell expression profiling and single-cell transcriptome  
134 analysis (Fig. 2; Suppl. Fig. 2). However, we found that 50 of the 680 differentially expressed genes were  
135 not present in the Drop-seq data. These genes are generally expressed at low levels, even in the cell  
136 population in which they are enriched (Table S5). This result suggests that the greater sequence depth  
137 afforded by bulk RNA-seq allows for detection of subtle transcriptomic differences between cell  
138 populations that can be missed by single-cell profiling. Taken together, these data indicate that despite their  
139 sister cell type relationship, photoreceptor and bipolar cells have markedly distinct transcriptional profiles,  
140 while ON and OFF bipolar cells are more similar at the transcriptome level than rods and cones.

141

#### 142 ***Bipolar cells have a more accessible chromatin landscape than either rods or cones***

143 To compare chromatin accessibility between photoreceptor and bipolar cells, we used ATAC-seq  
144 (Assay for Transposase-Accessible Chromatin by sequencing) to generate open chromatin profiles from  
145 FACS-purified bipolar cells<sup>45</sup>. Similar to our RNA-seq data, ATAC-seq generated reproducible open  
146 chromatin profiles across biological replicates (Pearson correlation 0.95-1.00, Fig. S1). We combined  
147 ATAC-seq peaks from bipolar cells with previously generated ATAC-seq data from purified mouse rods,  
148 blue cones, and ‘green’ cones (i.e., *Opn1mw*-expressing cones) as well as DNase-seq data<sup>46</sup> from whole  
149 retina, brain, heart, and liver to obtain a list of >345,000 open chromatin regions. Hierarchical clustering of  
150 chromatin accessibility profiles at enhancers (i.e. regions >1000 bp upstream or >100 bp downstream of  
151 annotated transcription start sites) showed that photoreceptors, bipolar cells, and whole retina cluster  
152 separately from other tissues (Fig. 3A). Thus, the sister cell type relationship between photoreceptors and  
153 bipolar cells is reflected by the similarity of genome-wide patterns of enhancer chromatin accessibility.  
154 Interestingly, whole retina DNase-seq clustered with bipolar cell samples, which is unexpected given that  
155 rod photoreceptors constitute ~80% of all cells in the mouse retina (Fig. 1A). This result may be a  
156 consequence of the distinctive pattern of global chromatin closure that we previously identified in rod  
157 photoreceptors<sup>30</sup>. Consistent with this, comparison of genome-wide patterns of chromatin accessibility in



158 rods, cones and whole retina showed that more than half of the whole retina peaks did not overlap with  
 159 photoreceptor peaks, suggesting that they likely derive from non-photoreceptor retinal cell types<sup>30</sup>.

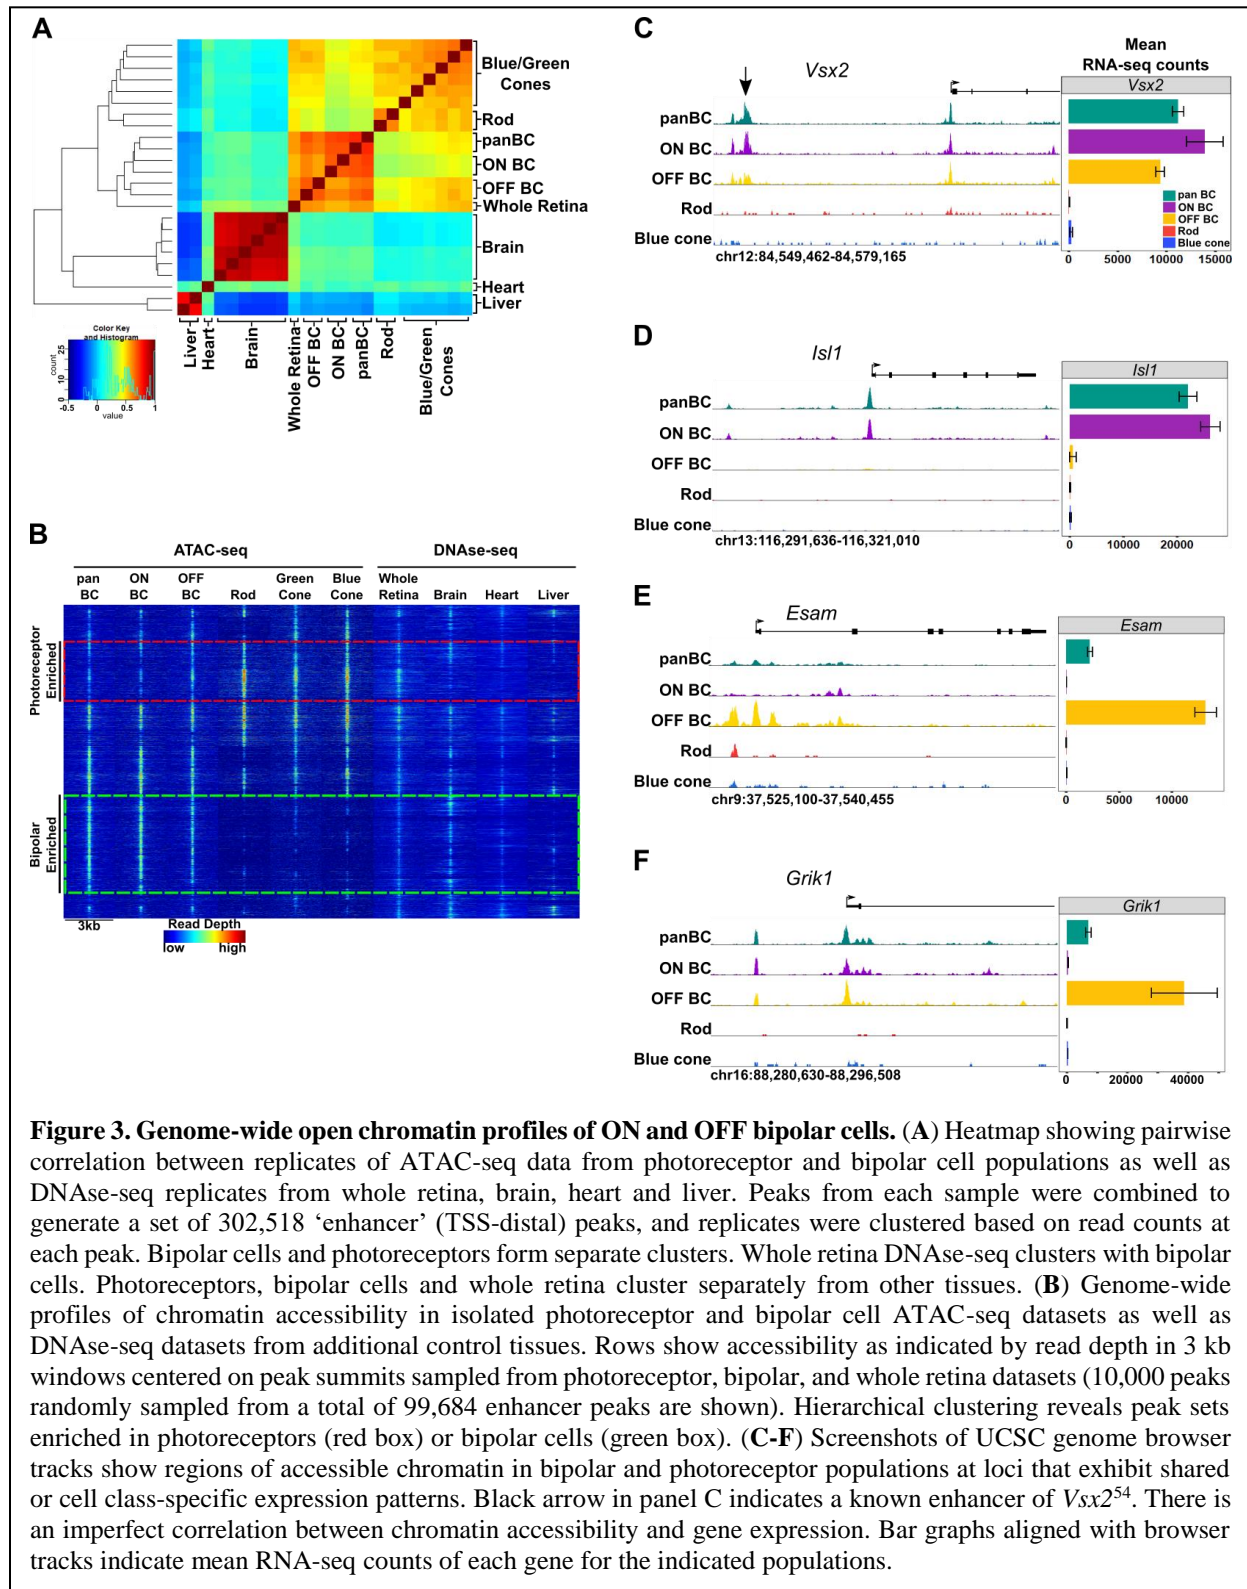

160 To investigate global accessibility within the retina we combined TSS-distal ATAC-seq peaks from  
161 bipolar cells and photoreceptors with DNase-seq peaks from whole retina to create a list of 99,684 retinal  
162 open chromatin regions. Clustering these regions based on chromatin accessibility in retinal as well as non-  
163 retinal cell types offers a broad view of cell class- and cell type-specific regions of open chromatin (Fig.  
164 3B). We found a large subset of bipolar-enriched peaks, many of which were also accessible in whole retina  
165 and brain (Fig. 3B, green box). Conversely, a smaller subset of peaks showed selective accessibility in  
166 photoreceptors, with lower levels of accessibility in bipolar cells, and even less in other cell types (Fig. 3B,  
167 red box). While pan BCs and ON-BCs showed nearly identical open chromatin profiles, OFF-BC open  
168 chromatin patterns were somewhat divergent, with slightly more accessibility in the photoreceptor-enriched  
169 subset (red box) and less in the bipolar-enriched subset (green box) compared to ON-BC. Overall, the sum  
170 of photoreceptor and bipolar cell ATAC-seq peaks accounted for 83 percent of whole-retina DNase-seq  
171 peaks, with the remainder presumably deriving from other inner retinal cell classes. These data suggest that  
172 relatively few regions of open chromatin are truly photoreceptor-specific, and that regions enriched in  
173 bipolar cells are more likely to share accessibility in other tissues, such as brain. For instance, compared to  
174 photoreceptors, a greater proportion of bipolar cell peaks corresponded to DNase-seq peaks in brain (47%  
175 vs 37%). Finally, direct comparison of ATAC-seq peaks from photoreceptor and bipolar cells identified  
176 55,402 differentially accessible regions (FDR < 0.05), 75% of which are more accessible in bipolar cells  
177 (Table S7).

178 While we observed significant differences in global chromatin accessibility between  
179 photoreceptors and bipolar cells, the open chromatin profiles of ON and OFF bipolar cells were largely  
180 similar, consistent with the high degree of similarity between their transcriptomes. Specifically, only 4,263  
181 peaks were differentially accessible between ON and OFF bipolar cells. Of note, 79% (3359) of these  
182 differential peaks were more accessible in ON bipolar cells. When examining loci surrounding genes  
183 expressed in both ON and OFF bipolar cells, we found that ON and OFF subclasses typically had similar  
184 open chromatin profiles (e.g., *Vsx2*, Fig. 3C). In contrast, some ON- or OFF-specific genes exhibit cell  
185 subclass-specific patterns of chromatin accessibility (e.g., *Isl1* and *Esam*, Fig. 3D-E). However, a

186 correlation between gene expression and chromatin accessibility is not found at all gene loci (e.g., *Grik1*,  
 187 Fig. 3F). Thus, the relationship between ON- and OFF-specific gene expression and chromatin accessibility  
 188 is complex, consistent with previous observations in rods and cones (Fig S5C).

189

190 ***Photoreceptor and bipolar cells employ closely related yet distinct cis-regulatory grammars***

191 Having compared global accessibility between photoreceptor and bipolar cells, we next sought to  
 192 compare them in terms of ‘cis-regulatory grammar’, which we define as the number, affinity, spacing and  
 193 orientation of TF binding sites within the open chromatin regions of a given cell type or class. To begin,  
 194 we assessed all 319 TF binding site motifs from the HOMER database<sup>47</sup> for enrichment within bipolar cell

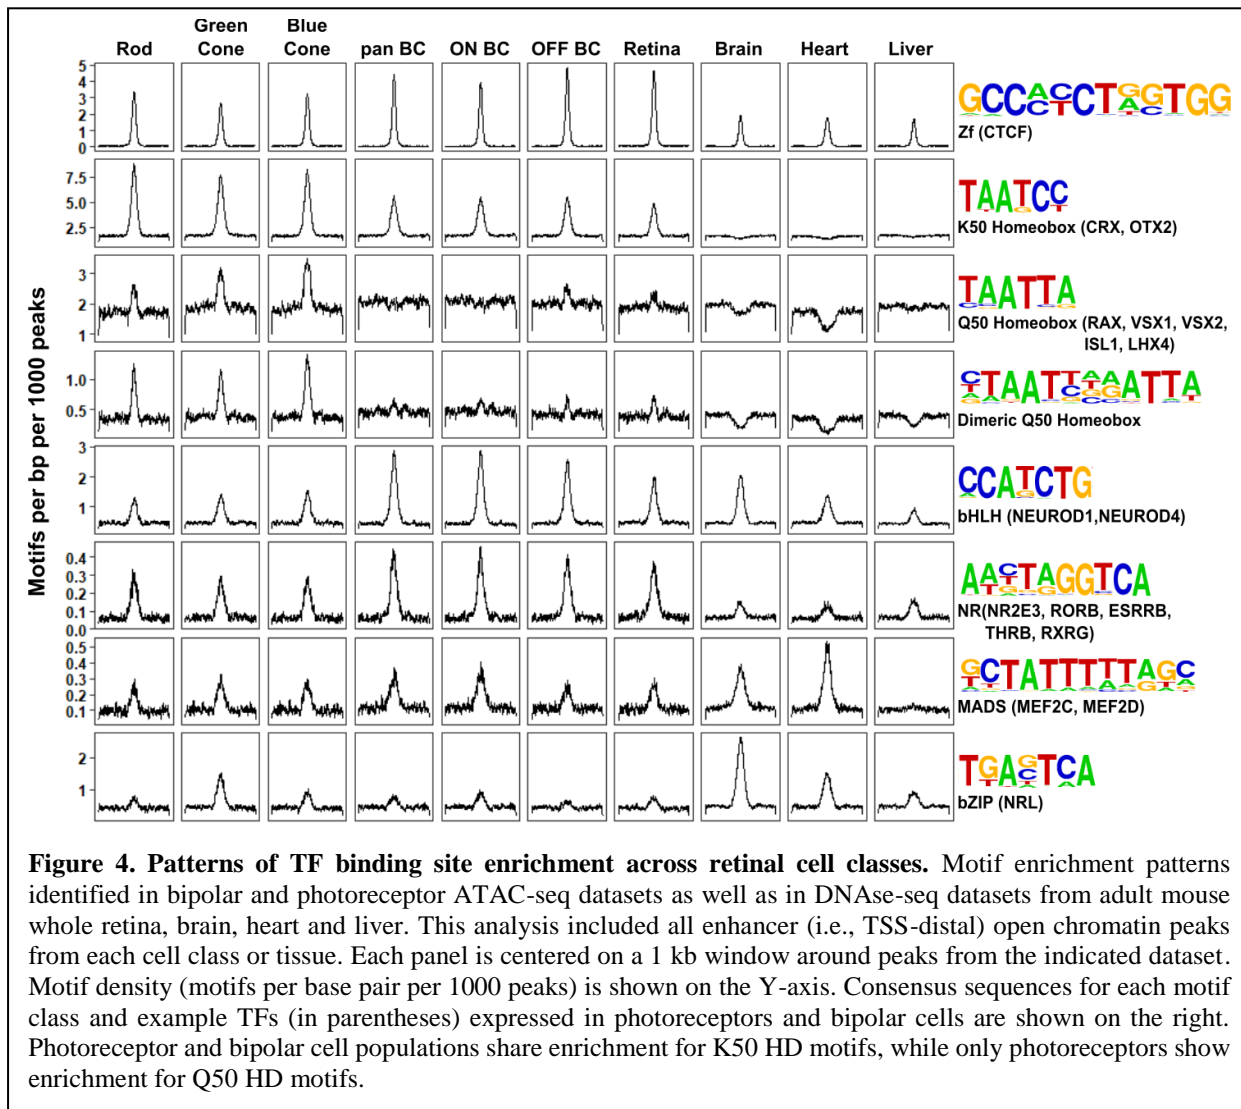

195 open chromatin regions. The most highly enriched motifs within enhancers corresponded to CTCF, K50  
196 HD, E-box, nuclear receptor, and MADS box motifs (Table S8). All of these motifs were previously shown  
197 to be among the most enriched motifs in photoreceptor ATAC-seq peaks as well<sup>30</sup>. The similarity in the  
198 patterns of TF binding site enrichment between photoreceptors and bipolar cells can be better understood  
199 in the context of known patterns of TF expression in these cell classes. Specifically, the K50 HD TFs OTX2  
200 and CRX are master regulators of gene expression programs in photoreceptor and bipolar cells. Likewise,  
201 bHLH TFs (which recognize E-box motifs) play roles in fate specification and maintenance of both  
202 photoreceptor and bipolar cell gene expression programs, as outlined in the Introduction. Finally,  
203 enrichment of ZF motifs recognized by CTCF in both cell classes is in line with reports that CTCF motifs  
204 lie in ubiquitously accessible chromatin regions<sup>48</sup>, where CTCF recruitment is thought to play an  
205 architectural role, mediating the interaction between promoters and enhancers, among other functions<sup>49,50</sup>.

206 Despite the overall similarity between the *cis*-regulatory grammars of bipolar cells and  
207 photoreceptors, there are notable quantitative differences in motif enrichment between the two cell classes.  
208 To systematically identify these differences, we compared the proportion of peaks containing each of the  
209 319 motifs between pan-bipolar cells and each photoreceptor cell type (Table S8). The most differentially  
210 enriched motifs corresponded to those with the highest enrichment in each cell class and are summarized  
211 in Figure 4. Although both photoreceptors and bipolar cells showed marked enrichment for K50 HD motifs,  
212 these motifs were more enriched in photoreceptors (Fig. 4). Conversely, E-box motifs were more enriched  
213 in bipolar cells than photoreceptors. The most striking difference in TF binding site enrichment between  
214 the two cell classes was the enrichment of both monomeric and dimeric Q50 HD motifs in photoreceptor  
215 open chromatin regions and their lack of enrichment in bipolar regions (Fig. 4). The most well-  
216 characterized Q50 HD TF expressed in photoreceptors is RAX, which is required for cone gene expression  
217 and survival<sup>32</sup>. In contrast, bipolar cells express multiple Q50 HD TFs (VSX2, VSX1, ISL1, LXH3, LHX4,  
218 AND SEBOX)<sup>44</sup>. VSX2 is required for bipolar cell development and is expressed in all mouse bipolar cell  
219 types throughout development and into adulthood<sup>20,21</sup>. The paradoxical absence of Q50 HD motif  
220 enrichment in bipolar open chromatin regions despite the presence of multiple Q50 HD TFs in this cell

221 class may be explained by the observation that VSX2 acts as a repressor of photoreceptor CREs<sup>34</sup>. We  
222 hypothesize that the lack of enrichment of Q50 motifs in bipolar cells is due to selective closure of  
223 photoreceptor-specific open chromatin regions by VSX2, which, in turn, prevents ectopic expression of  
224 photoreceptor genes in bipolar cells. We will return to this hypothesis in the final section of the Results.

225 To further compare the *cis*-regulatory grammars of bipolar cells and photoreceptors, we examined  
226 TF binding site co-occurrence and spacing within each cell class. For this analysis we compared a combined  
227 list of enhancer regions from rod and cones to that of bipolar cells. As previously reported for  
228 photoreceptors, motifs enriched for co-occurrence (pairs of motifs within a single open chromatin region)  
229 tended to include those that showed the highest individual enrichment<sup>30</sup>. For example, a common motif  
230 pair, found in open chromatin regions of both photoreceptors and bipolar cells, was a K50 HD motif co-  
231 occurring with an E-box (i.e., bHLH binding site). Overall, we found that the patterns of TF binding site  
232 co-occurrence were largely indistinguishable between bipolar cells and photoreceptors (Fig. S3)<sup>30</sup>.  
233 Similarly, motif co-occurrence is indistinguishable between ON and OFF bipolar cells (Fig. S3). To  
234 investigate preferences in spacing and orientation between pairs of motifs, we plotted the density of highly  
235 enriched motifs (those depicted in Fig. 4) centered on regions flanking K50 and Q50 HD motifs in each  
236 peak set. As described previously for photoreceptors, spacing and orientation preferences in bipolar open  
237 chromatin regions were minimal (Fig. S4)<sup>30</sup>. Thus, patterns of motif co-occurrence and spacing were largely  
238 indistinguishable between photoreceptors and bipolar cells; and the primary differences in the *cis*-  
239 regulatory grammar of the two cell classes appears to be the degree of HD and E-box motif enrichment.

240

241 ***Photoreceptor- and bipolar-specific open chromatin regions are positively correlated with cell class-***  
242 ***specific gene expression***

243 We next sought to determine the extent to which photoreceptor- and bipolar-enriched open  
244 chromatin regions correlate with cell type-specific gene expression. To this end, we assigned each of the  
245 55,402 regions identified as differentially accessible between photoreceptor and bipolar cells to a candidate  
246 target gene based on proximity to the nearest transcription start site and compared mean RNA-seq

247 expression values for the assigned genes. As described in previous studies, we observed a modest

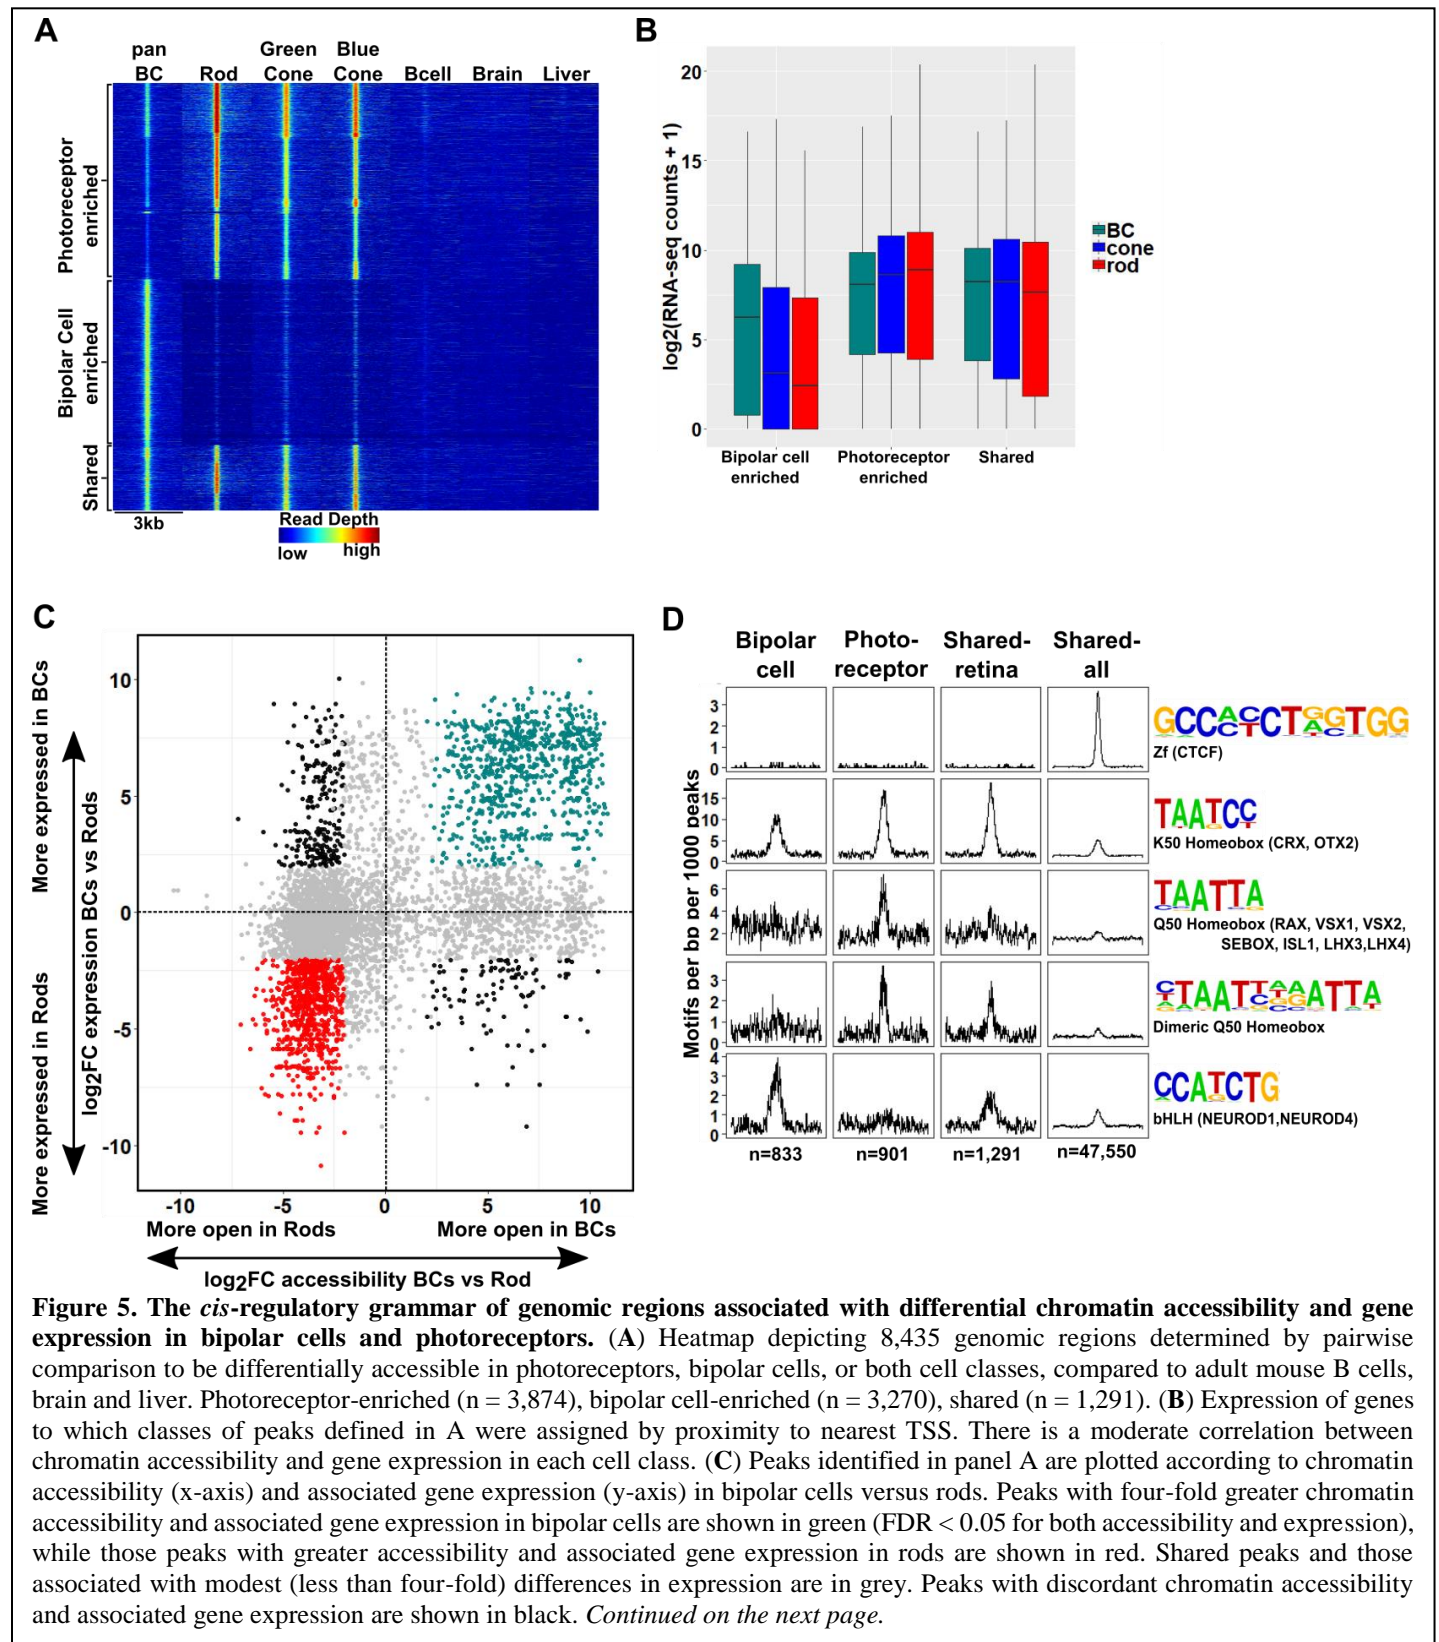

**Figure 5. The *cis*-regulatory grammar of genomic regions associated with differential chromatin accessibility and gene expression in bipolar cells and photoreceptors.** *Continued from the previous page (D)* Motif enrichment within peaks displaying correlated chromatin accessibility and associated gene expression in bipolar cells and photoreceptors as well as within peaks displaying shared accessibility, including those shown in panel A (shared-retina) and shared peaks which were not filtered to remove those accessible in non-retinal tissues (shared-all). Both photoreceptor and bipolar cell peaks show enrichment for K50 HD motifs. Bipolar cell peaks (n = 833) are also highly enriched for E-box motifs but lack enrichment of Q50 HD motifs. In contrast, photoreceptor peaks (n = 901) show enrichment for Q50 HD motifs but almost entirely lack E-box enrichment. Shared retina-specific peaks (n = 1,291) show a hybrid pattern of motif enrichment. Only the shared-all peak set exhibits enrichment for CTCF motifs, underscoring a key difference between cell-class specific open chromatin regions (which show no enrichment of CTCF motif) and ubiquitously open chromatin regions which show strong enrichment.

248 correlation between enhancer accessibility and gene expression, and a more robust correlation between  
249 promoter accessibility and gene expression (Fig. S5)<sup>30,51,52</sup>.

250 Our analysis of global chromatin accessibility suggested that many of the differentially accessible  
251 peaks were also open in other tissues, especially those enriched in bipolar cells compared to photoreceptors  
252 (Fig. 3E). Therefore, to gain a better understanding of the cell type-specific open chromatin regions that  
253 drive gene expression differences between these two cell classes, we refined our analysis to exclude peaks  
254 shared with non-retinal cell types. We identified 8,435 enhancer regions which are accessible either in  
255 photoreceptors or bipolar cells, but not accessible in brain, liver or splenic B cells (Fig 5A). This set includes  
256 1,291 regions that are open in both photoreceptors and bipolar cells, and 7,144 regions that are differentially  
257 accessible between the two cell classes (Figure 5A). We found that ~46% (3,270) of the differentially  
258 accessible peaks were more open in bipolar cells. Thus, most of the bipolar cell-enriched regions identified  
259 in the previous section were also accessible in one or more non-retinal tissues. As with the enhancer regions  
260 from the unfiltered list, assigning genes to this more retina-specific set of differentially accessible regions  
261 also shows a correlation between accessibility and gene expression (Fig. 5B). To visualize this association  
262 and identify the peaks that underly it, we plotted all 8,435 peaks according to fold-change differences in  
263 accessibility and gene expression between bipolar cells and rods (Fig. 5C) and between bipolar cells and  
264 blue cones (Fig. S5D). We then selected for further analysis those peaks that exhibited correlated  
265 accessibility and gene expression in photoreceptors (highlighted in red or blue in Fig. 5C and S5D; n = 901)  
266 or bipolar cells (highlighted in green in Fig. 5C and S5D; n = 833). These differentially enriched peaks  
267 represent strong candidates for CREs that mediate the gene expression differences between the two cell

268 classes. Indeed, the photoreceptor peak set contains known enhancers responsible for driving cell type-  
269 specific expression of *Rhodopsin* (*Rho*) and components of the rod-specific phototransduction cascade<sup>19,53</sup>,  
270 while the bipolar peak set contains a known enhancer driving *Vsx2* expression in bipolar cells<sup>54</sup>. To gain  
271 insight into the possible biological functions of these peaks we used GREAT<sup>55</sup> to assign biological  
272 annotations based on nearby genes and identified highly enriched biological processes associated with  
273 ‘sensory perception of light stimulus’ in the photoreceptor peak set and ‘transmission of nerve impulse’ in  
274 the bipolar peak set (Fig. S6). Thus, as was found with the unfiltered datasets, photoreceptor peaks are  
275 linked with genes associated with light sensation, whereas bipolar peaks are linked to genes involved in  
276 more generic neuronal functions.

277         Next, we asked whether the patterns of TF binding site enrichment observed with aggregate sets of  
278 ATAC-seq peaks from each cell class would be preserved within the retina-specific peak sets associated  
279 with correlated gene expression. We compared photoreceptor-enriched regions, bipolar-enriched regions,  
280 and regions that share accessibility between the two cell classes which were either specific to the retina  
281 (Fig. 5A, ‘shared retina’ n = 1,291), or unfiltered (‘shared all’, n = 47,550). We found that K50 HD motifs  
282 were enriched in both shared and cell class-selective regions, but to a lesser extent in regions specifically  
283 enriched in bipolar cells. The bipolar-selective regions were markedly enriched for E-box motifs but  
284 completely lacked enrichment for Q50 HD motifs (Fig. 5D). Conversely, photoreceptor-selective regions  
285 were enriched for Q50 HD motifs, but lacked E-box motif enrichment. Peaks that were shared between the  
286 two cell classes showed an intermediate pattern of motif enrichment. Of note, CTCF enrichment was absent  
287 in all but the unfiltered peak set, suggesting that the CTCF enrichment observed in Figure 4 is attributable  
288 to ubiquitously accessible peaks. Taken together, these findings suggest that differential enrichment of Q50  
289 HD and E-box motifs are the key features that distinguish the *cis*-regulatory grammars of photoreceptors  
290 and bipolar cells.



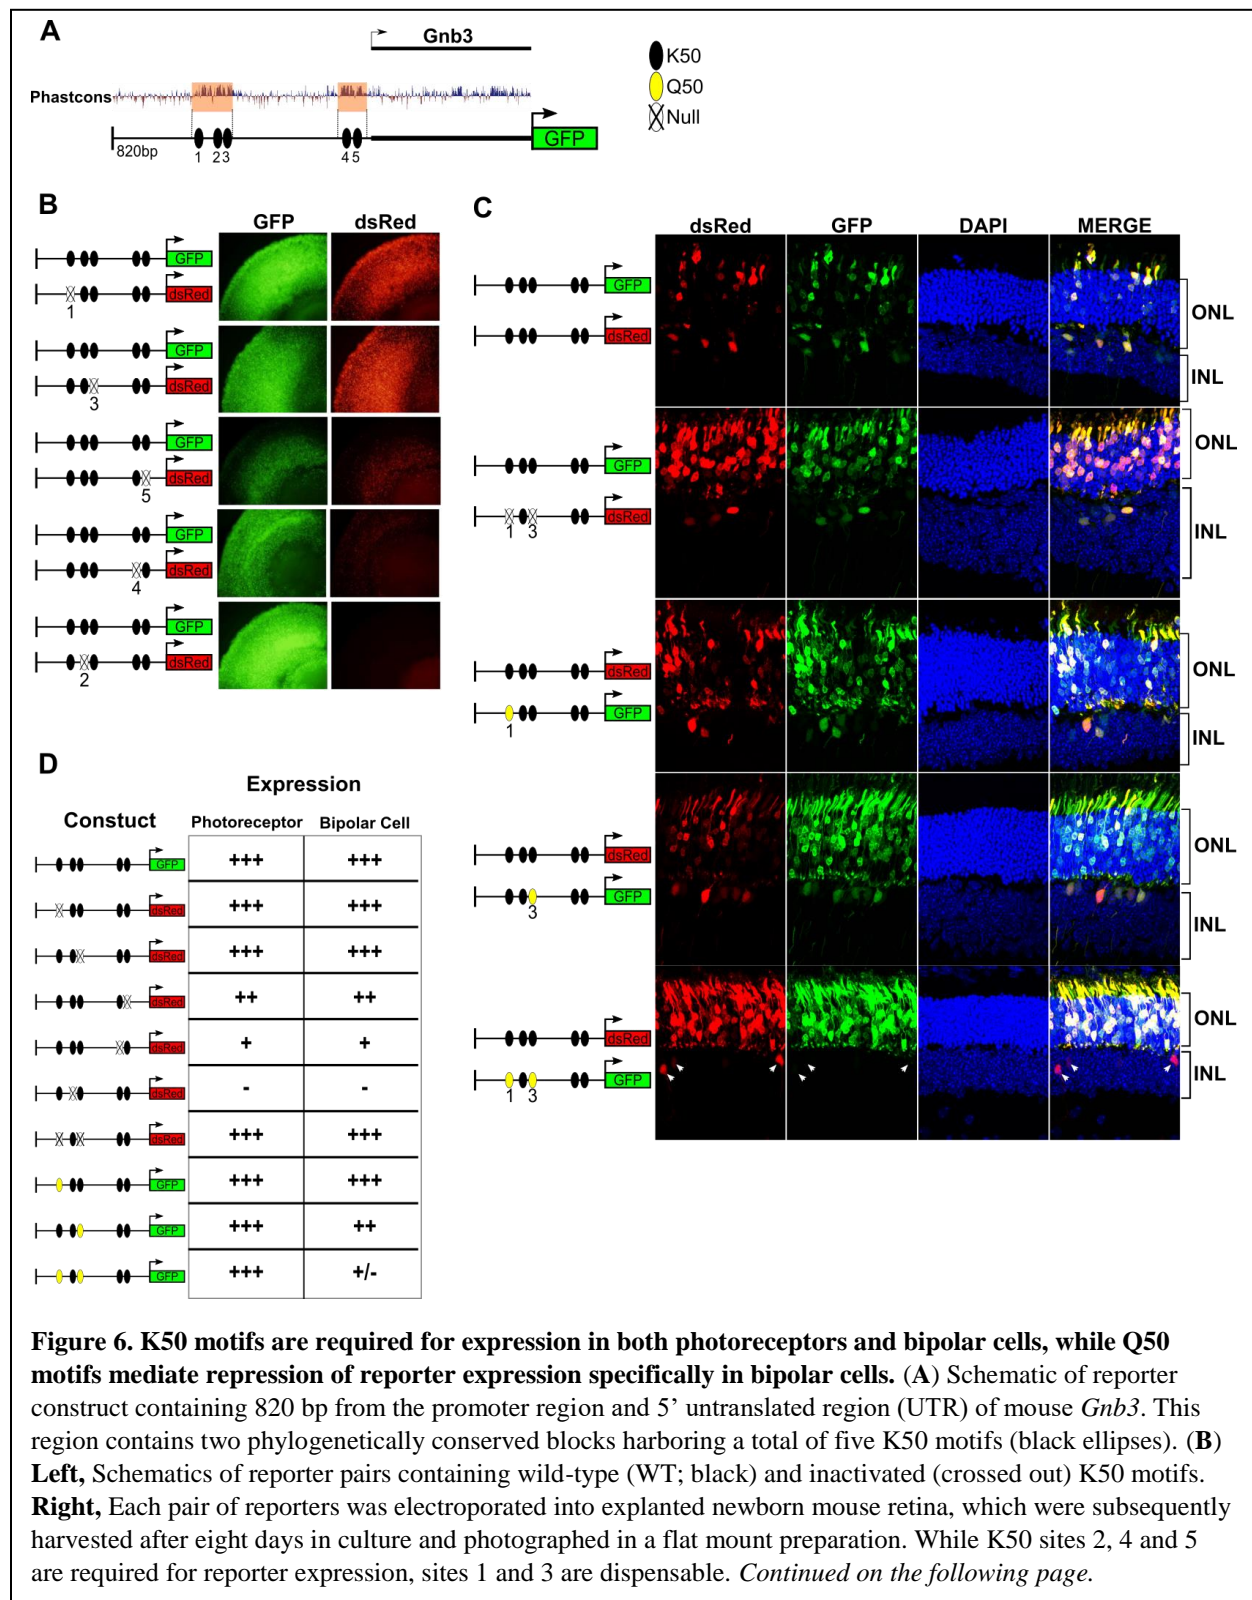

**Figure 6. K50 motifs are required for expression in both photoreceptors and bipolar cells, while Q50 motifs mediate repression of reporter expression specifically in bipolar cells.** *Continued from the previous page.* (C) **Left**, Pairs of reporters containing WT, inactivated K50, or novel Q50 (TAATTA; yellow) motifs were electroporated into newborn mouse retina *in vivo*. Mice were allowed to grow for 20 days at which point retinas were harvested and photographed in vertical cross-sections. **Right**, Representative cross-sections of retinas injected with the indicated pair of reporters. Loss of both K50 motifs 1 and 3 has no effect on expression in either photoreceptors or bipolar cells, while converting these same sites to Q50 motifs abrogates expression specifically in bipolar cells (n = 3-6 depending on reporter pair). White arrowheads indicate bipolar cells expressing the WT reporter, but not the mutated one. (D) Table summarizing the results of reporter analysis presented in (B) and (C).

292 *K50 motifs in the Gnb3 promoter are required for both photoreceptor and bipolar expression, but*  
293 *addition of Q50 motifs selectively represses expression in bipolar cells*

294         Given the critical roles of HD TFs in the regulation of photoreceptor and bipolar gene expression,  
295 we further investigated the role of K50 and Q50 motifs in a specific *cis*-regulatory region, the promoter of  
296 *Gnb3*. *Gnb3* encodes the  $\beta$  subunit of a heterotrimeric G-protein required for cone phototransduction as  
297 well as ON bipolar cell function. *Gnb3* is expressed in rods, cones, and bipolar cells during early postnatal  
298 retinal development in the mouse. Selective repression of *Gnb3* in rods by the nuclear receptor TF NR2E3  
299 results in a cone + bipolar pattern after postnatal day 10<sup>56,57</sup>. We focused on the 820 bp immediately  
300 upstream of the TSS of *Gnb3* which drives robust expression in rods, cones, and bipolar cells when  
301 electroporated into early postnatal mouse retina. This region lacks Q50 motifs but contains five K50 HD  
302 motifs of varying affinity which occur in two clusters, one immediately upstream of the TSS (-65 bp) and  
303 the other more distally (-350 bp). To evaluate the role of these five K50 motifs in mediating photoreceptor  
304 and bipolar expression, we engineered reporter constructs in which each of the five motifs was individually  
305 inactivated by mutating the TAAT core to TGGT. We then introduced wild-type and mutant reporters into  
306 mouse retinal explants via electroporation and compared expression levels after 8 days. Mutations in K50  
307 motifs 2, 4 and 5 resulted in coordinate loss of expression in both photoreceptor and bipolar cells, indicating  
308 that these motifs are required for reporter expression in both cell classes. Conversely, mutations in site 1 or  
309 3 had no effect on expression in either cell class (Fig. 6B). Binding site affinity did not correlate with  
310 expression, as site 3 has a higher predicted affinity than sites 4 or 5. Thus, the *Gnb3* promoter contains both

311 essential and nonessential K50 motifs, underscoring the critical role for these shared motifs in both  
312 photoreceptors and bipolar cells.

313         Next, we sought to determine the effect of introducing Q50 motifs into the *Gnb3* promoter. For  
314 these experiments, reporters were introduced into newborn mouse retinas via *in vivo* electroporation and  
315 harvested for histologic analysis after 20 days. First, we electroporated identical wild-type sequences  
316 driving both dsRed and GFP to confirm that essentially all photoreceptors and bipolar cells received both  
317 constructs (Fig. 6C). Next, we compared the expression of a *Gnb3* promoter containing mutations in K50  
318 motifs 1 and 3 to that of a wild-type promoter, confirming that elimination of both of these sites has no  
319 effect on expression in either photoreceptors or bipolar cells (Fig. 6 C, D). To test the effect of introducing  
320 Q50 motifs into the *Gnb3* promoter, we replaced K50 motifs 1 and 3 with a Q50 motif (TAATTA), both  
321 individually and in combination. Whereas introduction of a Q50 motif into site 1 had no apparent effect,  
322 replacement of site 3 caused a selective decrease in bipolar expression with no change in photoreceptor  
323 expression. When we introduced Q50 motifs into both sites, reporter expression was selectively turned off  
324 in bipolar cells, with no effect on photoreceptor expression. These data, along with previous reports of  
325 VSX2-mediated repression of photoreceptor-specific promoters/enhancers, suggest that Q50 motifs play an  
326 important role in mediating repression of photoreceptor genes in bipolar cells.

327

## 328 **Discussion**

329         In this study we generated open chromatin maps and transcriptome profiles of mouse bipolar cells,  
330 including FACS-purified ON and OFF bipolar cell populations, and compared them to analogous data from  
331 rod and cone photoreceptors. We found that photoreceptors and bipolar cells differ in the expression of  
332 thousands of genes, and yet have very similar *cis*-regulatory grammars. The key *cis*-regulatory differences  
333 that distinguish the two cell classes are the preferential enrichment of Q50 HD motifs in open chromatin  
334 regions associated with photoreceptor-specific gene expression and a corresponding enrichment of E-box  
335 motifs in chromatin associated with bipolar-specific expression. The cellular features and transcriptional  
336 mechanisms shared by photoreceptors and bipolar cells have prompted speculation that these two sister cell

337 types arose from a single ancestral photoreceptor cell type via a process of progressive cellular  
338 divergence<sup>5,6</sup>. We propose that the elimination of Q50 motifs from bipolar-specific CREs likely played a  
339 key role in differentiating the bipolar transcriptome from that of photoreceptors during early stages of  
340 vertebrate retinal evolution. Prior studies of individual photoreceptor CREs showed a role for the Q50 HD  
341 TF, VSX2, in selectively repressing photoreceptor genes in bipolar cells<sup>20,34</sup>. Our results generalize this  
342 conclusion, suggesting that VSX2 plays a genome-wide role in silencing photoreceptor gene expression in  
343 bipolar cells. A similar role for VSX2 has recently been described in the spinal cord, where closely related  
344 progenitor cells give rise to either motor neurons or V2a interneurons<sup>58</sup>. VSX2 promotes V2a identity by  
345 directly repressing the motor neuron gene expression program and by competing for Q50 sites at motor  
346 neuron enhancers. Thus, in both retina and spinal cord, expression of VSX2 promotes interneuron fate at  
347 the expense of the alternative ‘effector’ neuron (photoreceptor or motor neuron) cell type. These parallels  
348 suggest that transcriptional repression by cell type-specific TFs such as VSX2 represent a common  
349 mechanism for differentiating the gene expression programs of two closely related cell types.

350 Support for the idea that bipolar cells diverged from photoreceptors via progressive partitioning of  
351 cellular function is provided by the existence of cell types in the retinas of non-mammalian vertebrates with  
352 features intermediate between those of mammalian photoreceptors and bipolar cells. In some turtle species  
353 ~30% of the cell bodies in the photoreceptor layer (the outer nuclear layer) belong to bipolar cells, not  
354 photoreceptors<sup>12</sup>. These so-called ‘displaced bipolar cells’ possess an inner segment-like process that  
355 extends to the outer limiting membrane and contains abundant mitochondria and even a sensory-type (‘9 +  
356 0’) cilium (Fig. 7A,B). Thus, displaced bipolar cells closely resemble typical photoreceptors except that  
357 they lack an outer segment, possess dendrites in the outer plexiform layer, and synapse directly onto retinal  
358 ganglion cells. Another intermediate type of bipolar cell occurs in nearly all non-mammalian vertebrate  
359 classes and even in some mammalian species<sup>13–15,59</sup>. This bipolar type has a nucleus localized to the inner  
360 nuclear layer, but retains an inner segment-like structure, called Landolt’s club, which extends from the  
361 cell’s dendritic arbor to the outer limiting membrane and contains abundant mitochondria and a sensory-  
362 type cilium (Fig. 7A)<sup>13–15</sup>. We suggest that displaced bipolar cells and those with a Landolt’s club represent

363 ‘transitional forms’ on the evolutionary path from photoreceptor to typical bipolar cell. The existence of  
364 these transitional forms suggests that bipolar cells may have evolved via the stepwise repression of discrete  
365 gene modules required for the development of individual cellular features, or ‘apomeres’, that are specific  
366 to photoreceptors.

367         If this evolutionary model is correct, then how can we account for the co-existence of ‘transitional’  
368 bipolar cell types and ‘conventional’ bipolar cells in a single retina? One testable hypothesis is that VSX2  
369 may be expressed at lower levels in transitional bipolar cell types, thereby permitting expression of  
370 additional photoreceptor gene modules and their corresponding apomeres. Alternatively, it is possible that  
371 additional activating Q50 HD TFs are expressed in transitional bipolar types, and these TFs can overcome  
372 VSX2-mediated repression of selected photoreceptor gene modules. Indeed, we have found that multiple  
373 Q50 HD TFs are expressed in subsets of mouse bipolar cells. In addition, there is evidence that transitional  
374 bipolar cell types with Landolt’s club may exist in the mouse<sup>60</sup>. Thus, individual bipolar cell types may  
375 control the number of photoreceptor apomeres they express by modulating the balance of activating and  
376 repressing Q50 HD TFs in their nuclei.

377         The evolutionary divergence of bipolar cells from photoreceptors likely required coordinated  
378 changes in both *cis*-regulatory grammar and HD TF expression. The Q50 HD TF, RAX, is expressed in  
379 developing vertebrate rods and cones and is required for normal activation of photoreceptor gene expression  
380 in mice<sup>32,61</sup>. The expression of a RAX homolog in the photoreceptors of the tadpole larva of the  
381 protochordate, *Ciona intestinalis*, suggests a primordial role for this Q50 HD TF in activating photoreceptor  
382 gene expression in chordates. These data suggest that both K50 and Q50 motifs were present in the CREs  
383 of the ancestral vertebrate photoreceptor prior to the evolutionary emergence of bipolar cells, and that both  
384 K50 (OTX2 and CRX) and Q50 (RAX) HD TFs were required for gene activation in that ancestral cell type  
385 (Fig. 7C). In this context, the emergent expression of a repressive Q50 HD TF (VSX2) in a primordial  
386 bipolar cell would have permitted selective repression of CREs containing Q50 motifs. Maintaining

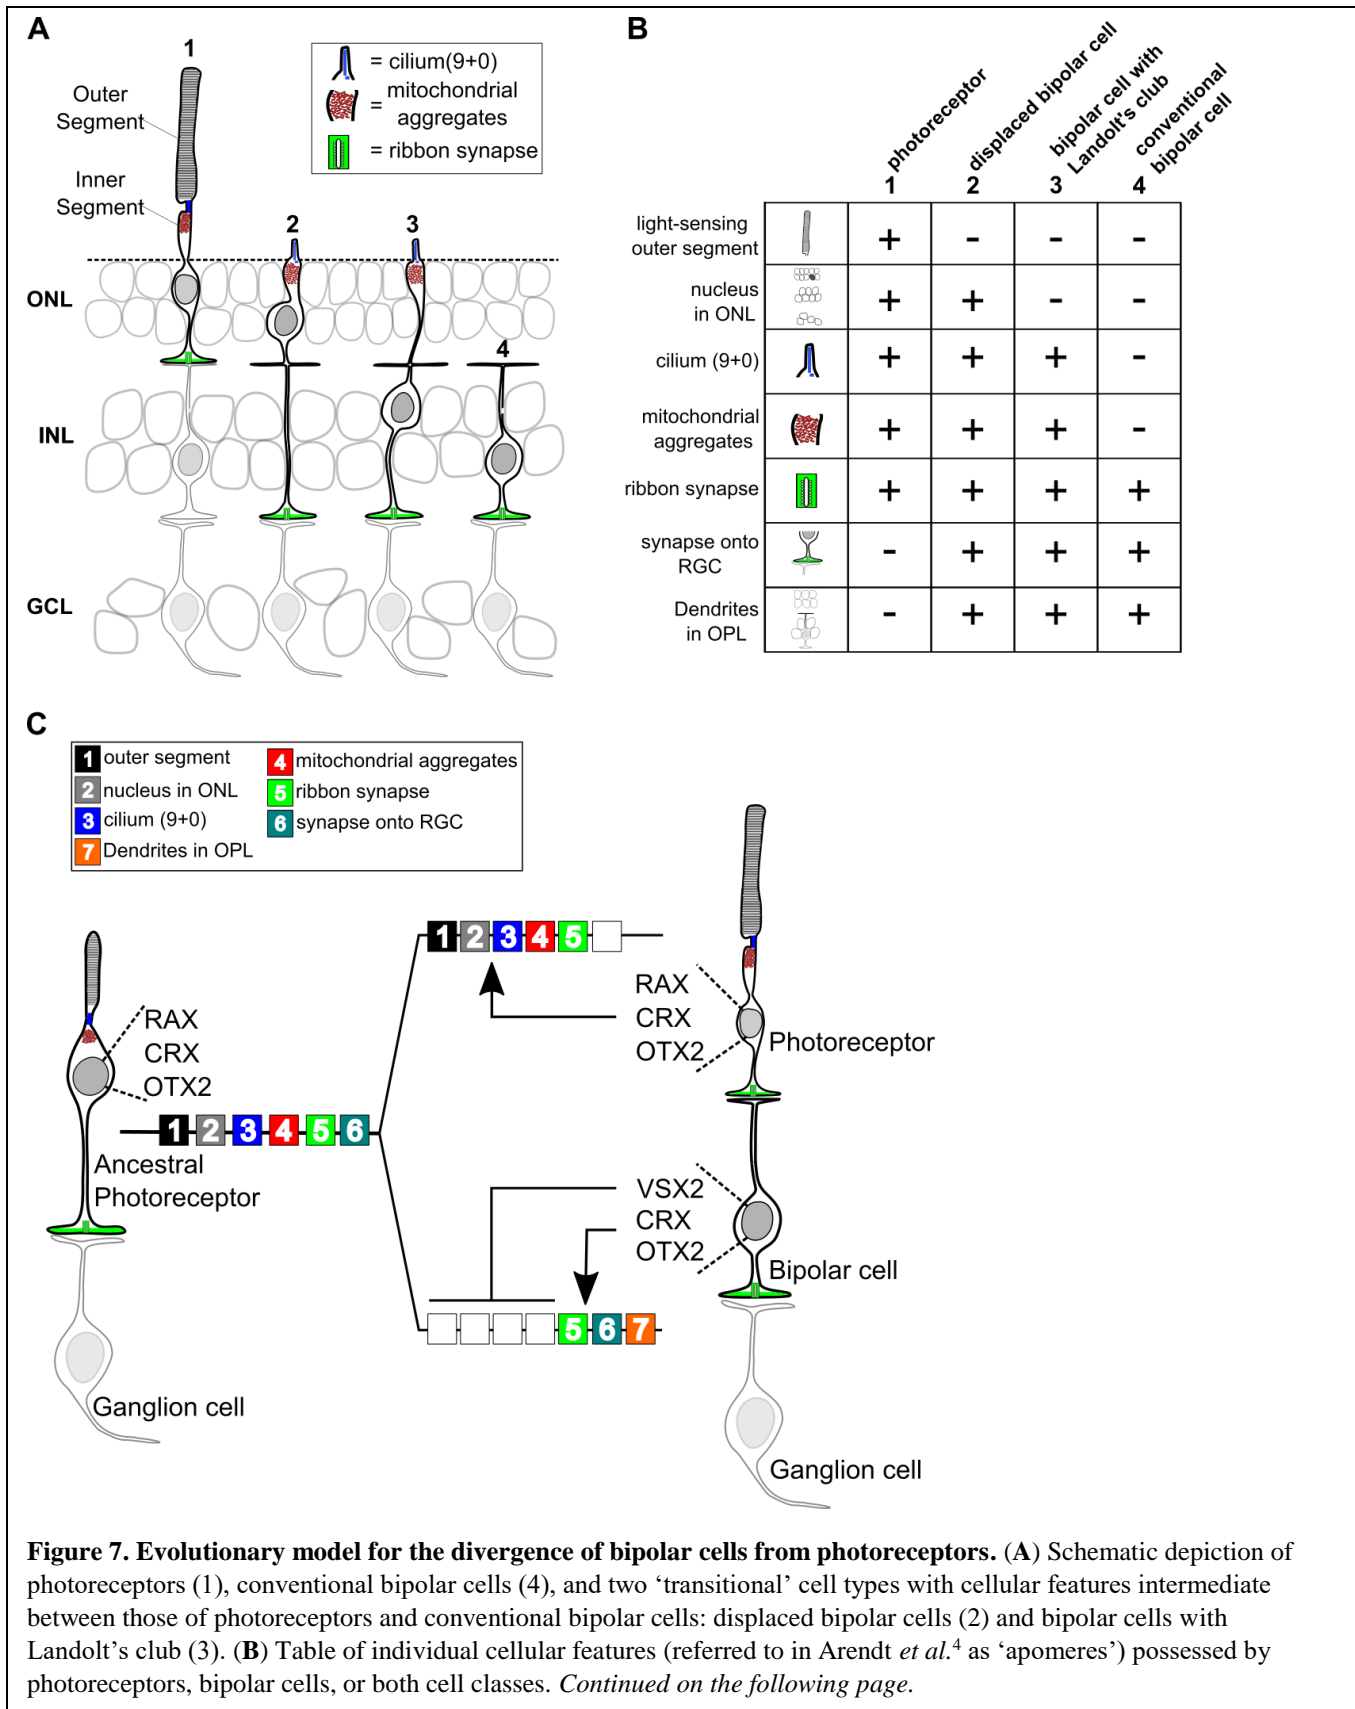

**Figure 7. Evolutionary model for the divergence of bipolar cells from photoreceptors.** *Continued from the previous page.* (C) Evolutionary model for the divergence of present-day photoreceptors and bipolar cells from a common ancestral photoreceptor type. We propose that the ancestral photoreceptor (possibly present in a hagfish-like ancestor) expressed cell type-specific genes via both K50 HD TFs (CRX and OTX2) and a possibly weakly activating Q50 HD TF (RAX). The emergent expression of a strongly repressive Q50 HD TF (VSX2) in bipolar cells then permitted silencing of selected photoreceptor gene modules underlying the formation of defined photoreceptor apomeres (e.g., outer segment). Selective expression of activating Q50 HD TFs in ‘transitional’ bipolar cell types may have allowed the derepression of specific photoreceptor apomeres (e.g., cilium formation, mitochondrial aggregates). Novel bipolar-specific apomeres (e.g., dendrites in the outer plexiform layer [OPL]) may have evolved via co-option of other gene expression programs.

388 elimination of Q50 motifs from the *cis*-regulatory regions of those genes.

389           These evolutionary considerations suggest that the modern vertebrate retina arose from an ancestral  
390 retina in which photoreceptors directly synapse onto projection neurons (i.e., ganglion cells) without an  
391 intervening layer of interneurons (left side of Fig. 7C). Two lines of evidence suggest that such a retina may  
392 have existed. First, the retina of the hagfish, the most primitive extant vertebrate, reportedly has  
393 photoreceptors that directly synapse onto projection neurons (i.e., ganglion cells)<sup>6,62</sup>. Second, some  
394 vertebrate species (including reptiles, amphibians, and larval lamprey) have an unpaired, median ‘parietal  
395 eye’ developmentally related to the pineal gland, which contains photoreceptors that directly synapse onto  
396 ganglion cells<sup>63–66</sup>. It is possible that the parietal eye evolved from the midline ‘eye’ of a protochordate  
397 ancestor, akin to the present-day ascidian larva. The simple lateral eyes of a hagfish-like vertebrate ancestor  
398 may then have emerged via co-option of the gene networks required for parietal eye development.  
399 Subsequently, bipolar cells may have arisen in the lateral eyes of early vertebrates via subtle changes in *cis*-  
400 regulatory grammar and TF expression, paving the way for the emergence of the sophisticated interneuronal  
401 circuitry found in present-day vertebrate retinas.

402

403

404

405

406

407

A

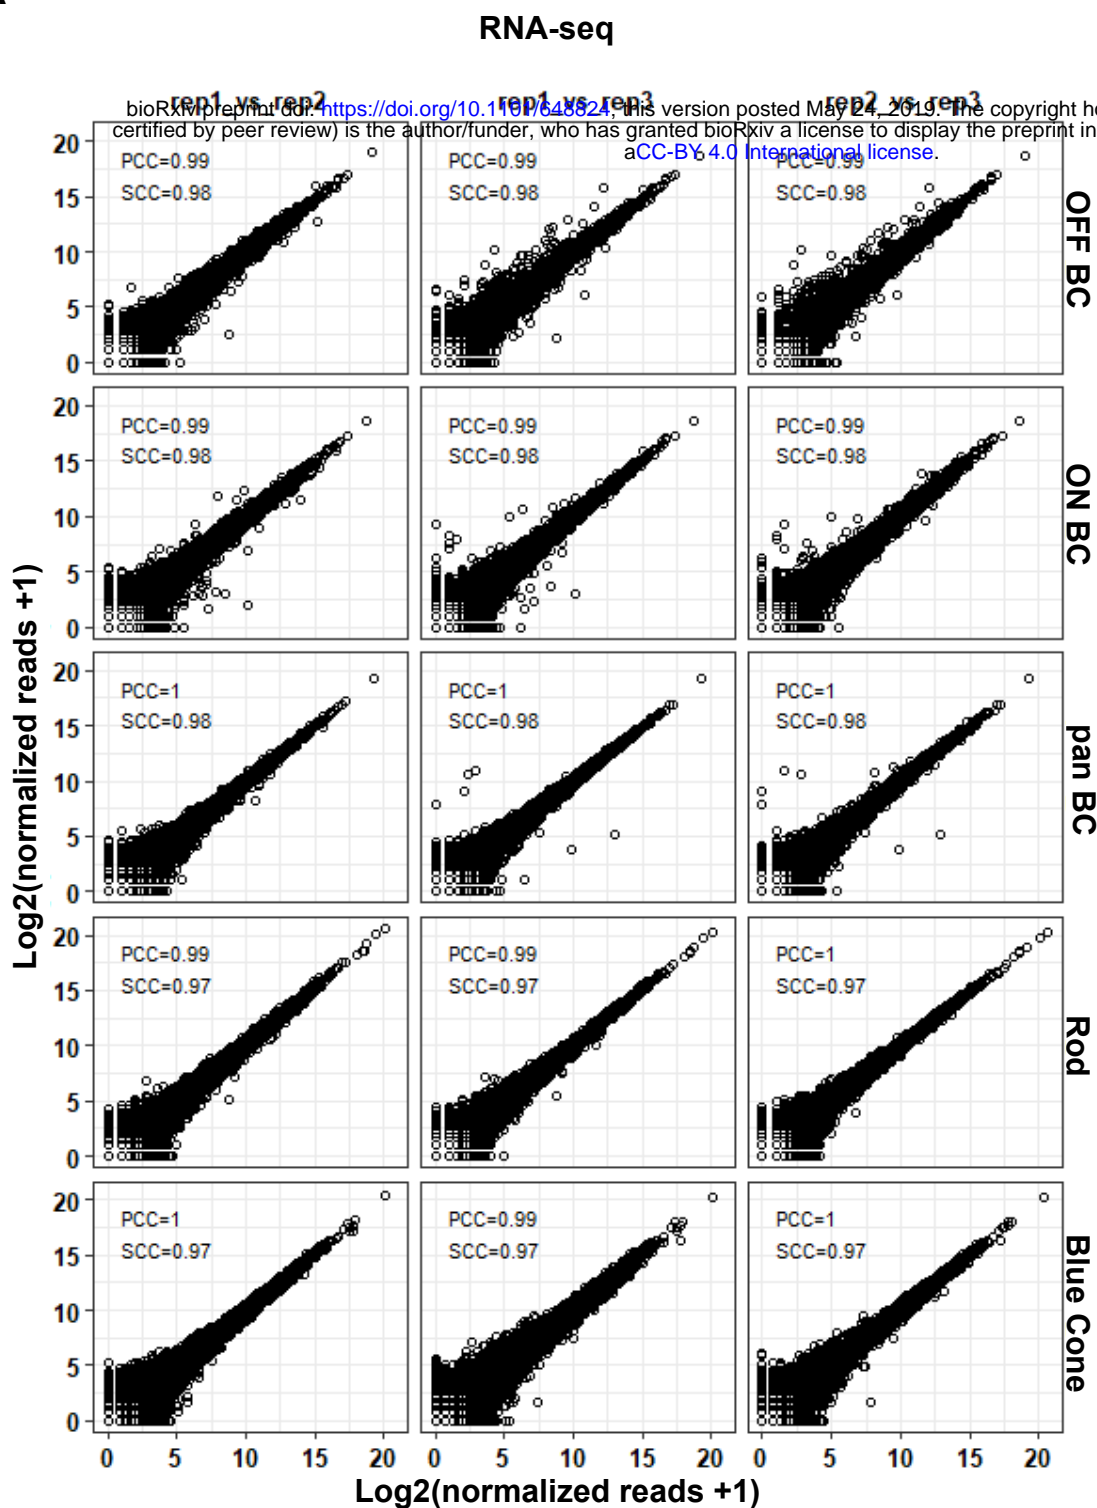

B

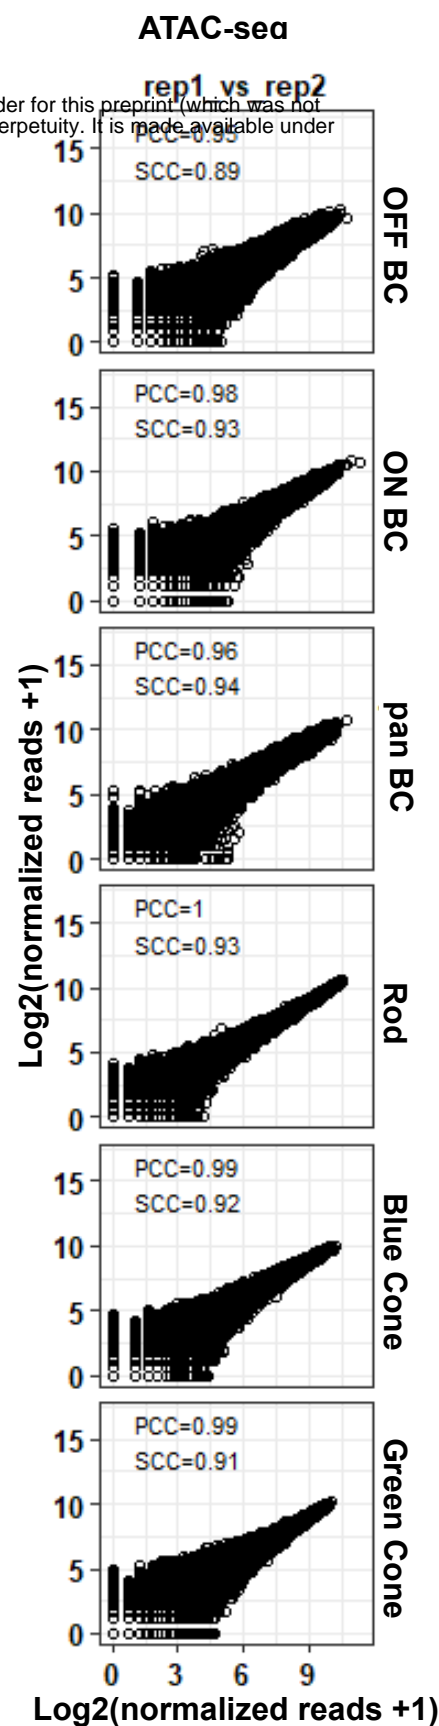

**Supplementary Figure S1. Reproducibility of ATAC-seq and RNA-seq datasets.** (A) Pairwise comparison between biological replicates of RNA-seq from purified photoreceptor and bipolar cell populations. For each sample, normalized read counts from one biological replicate are plotted against normalized read counts of another biological replicate. (B) Pairwise comparison between biological replicates of ATAC-seq from purified photoreceptor and bipolar cell populations as in A. PCC: Pearson Correlation Coefficient. SCC: Spearman Correlation Coefficient.



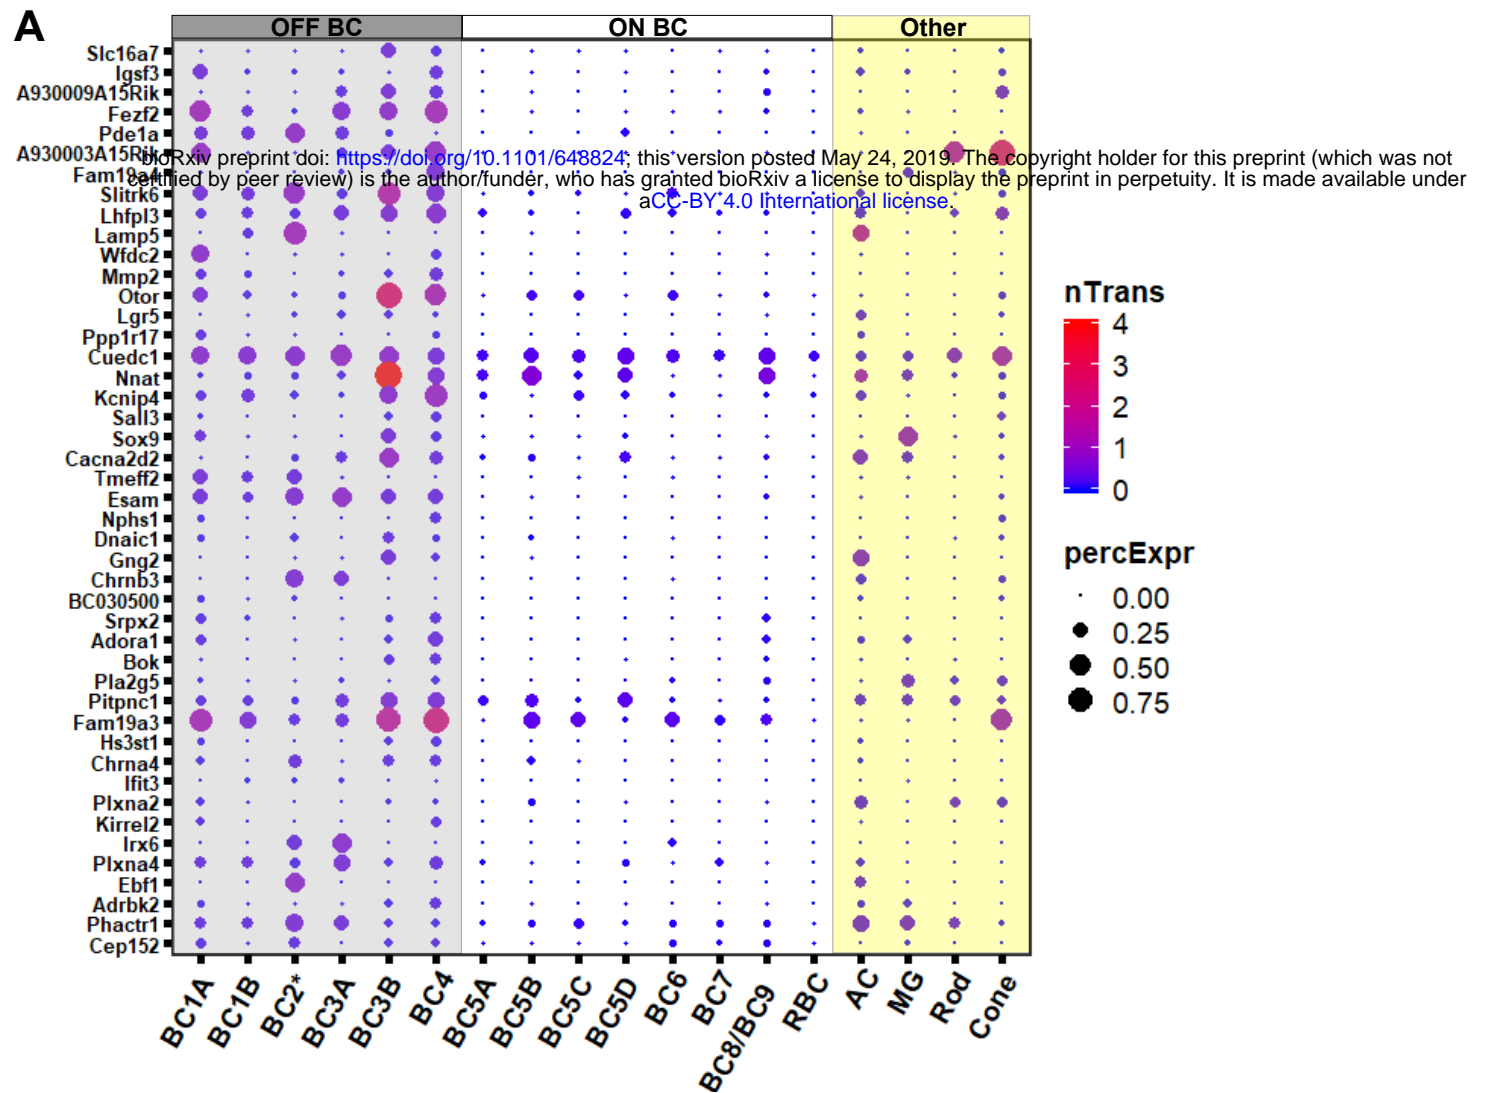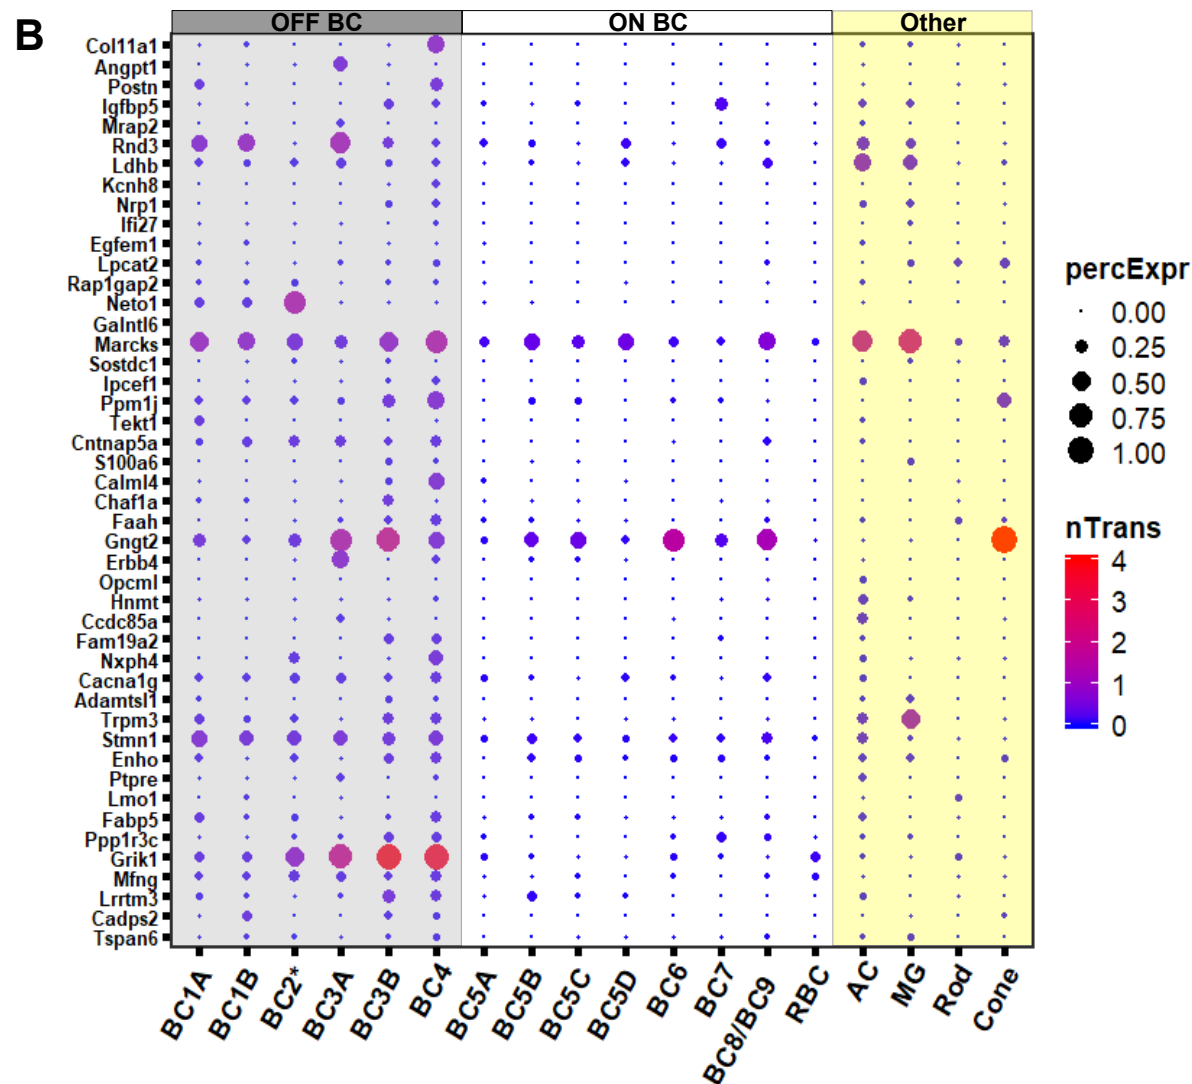

Cell type identified by Shekhar *et al* 2016

C

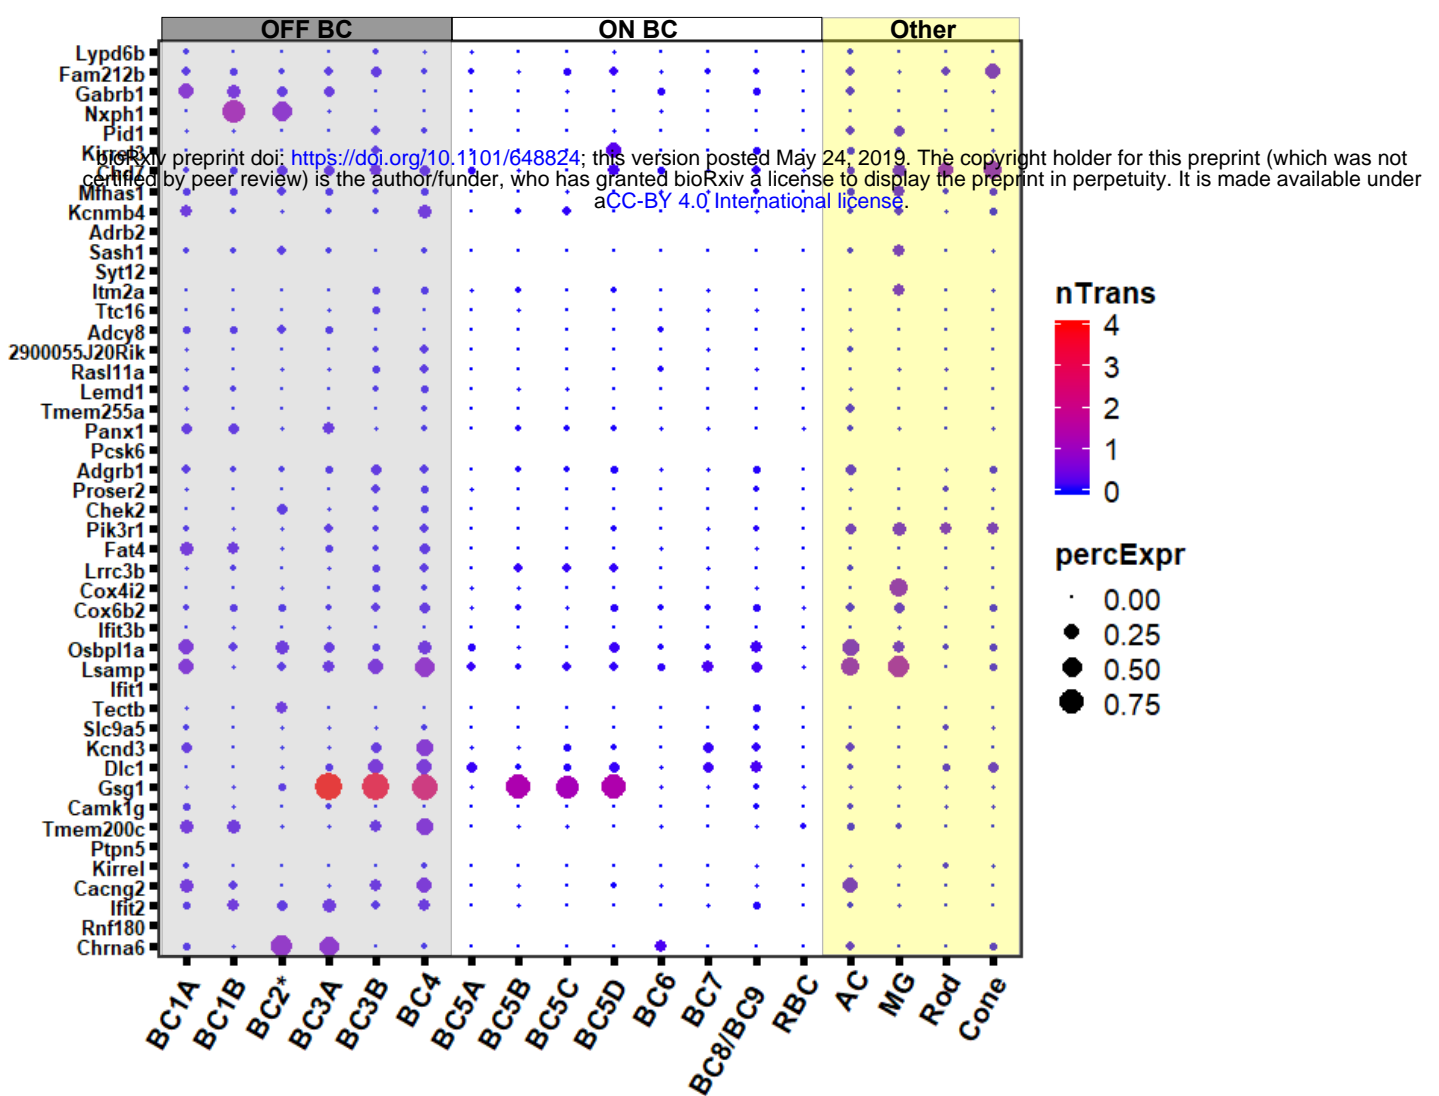

D

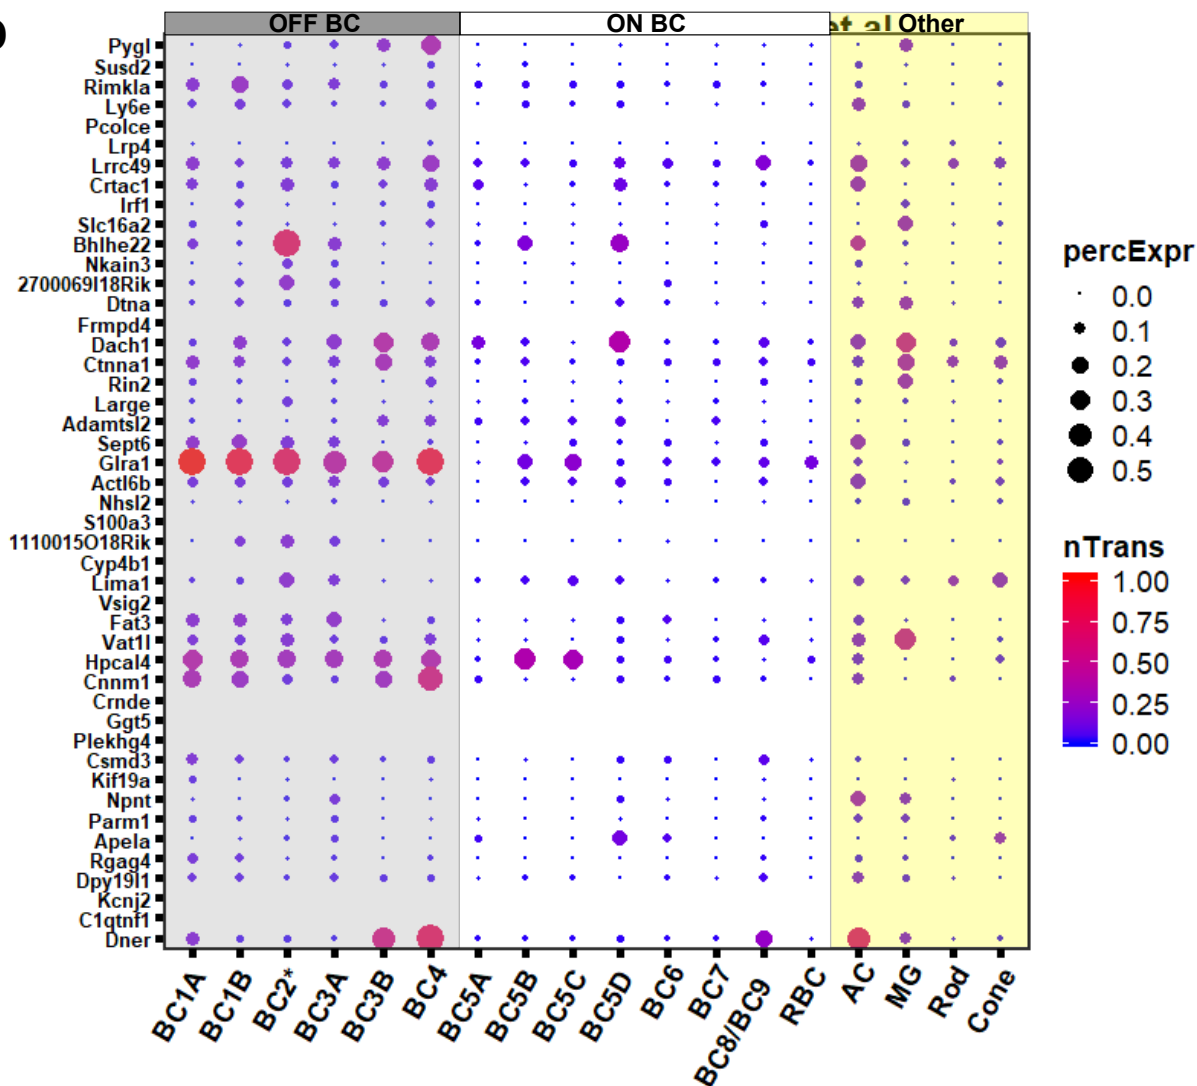Cell type identified by Shekhar *et al* 2016

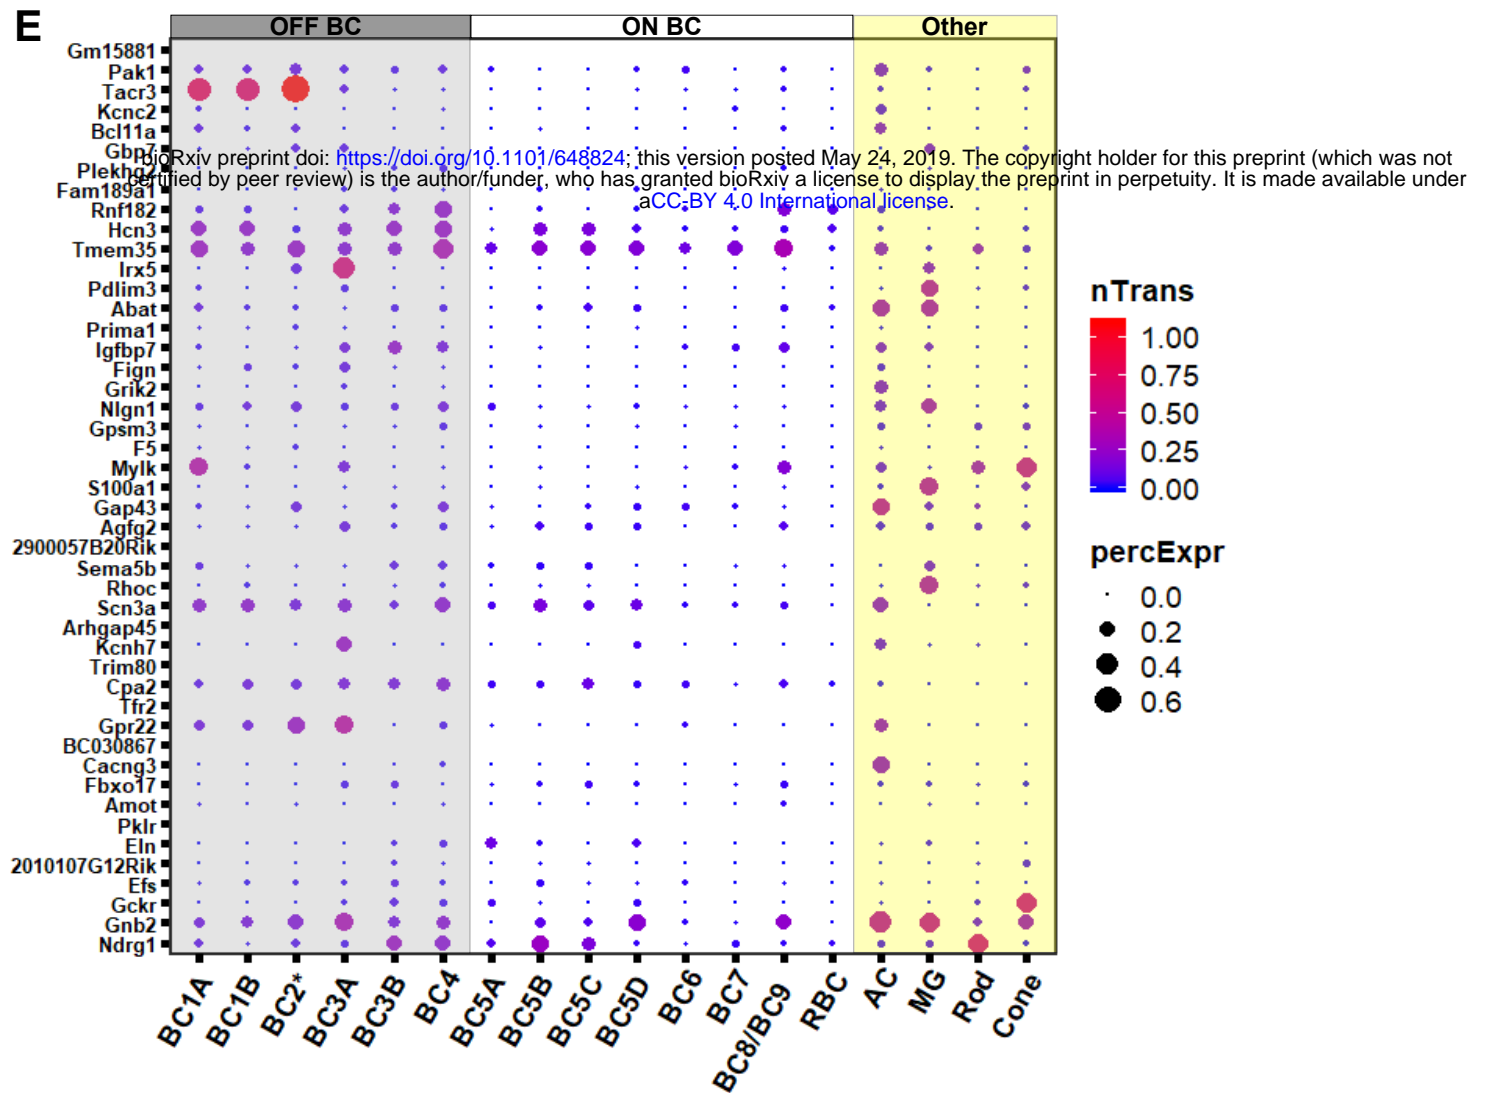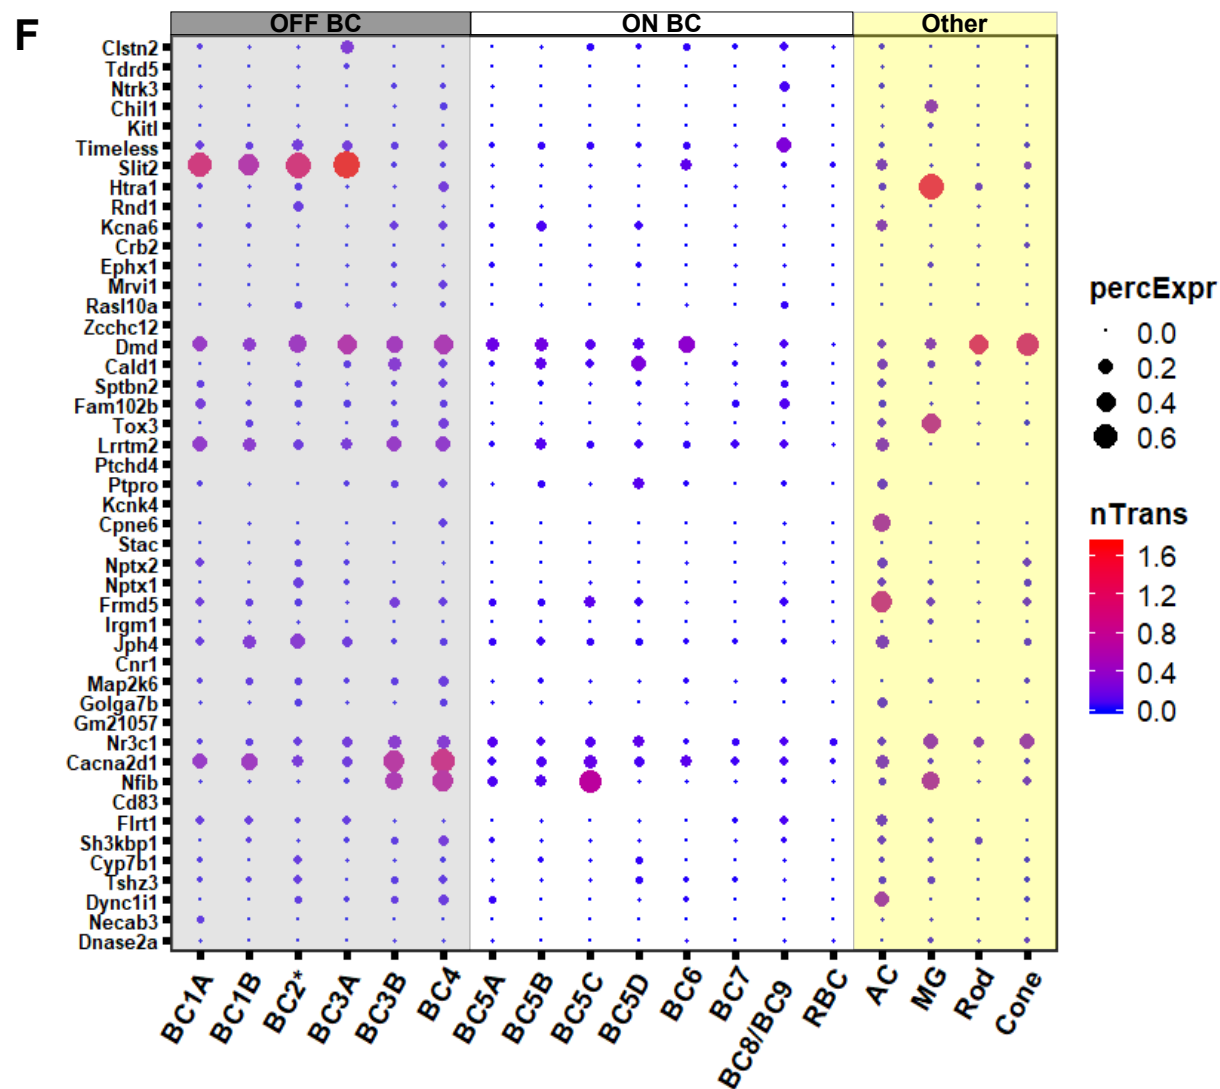

Cell type identified by Shekhar et al 2016

**G**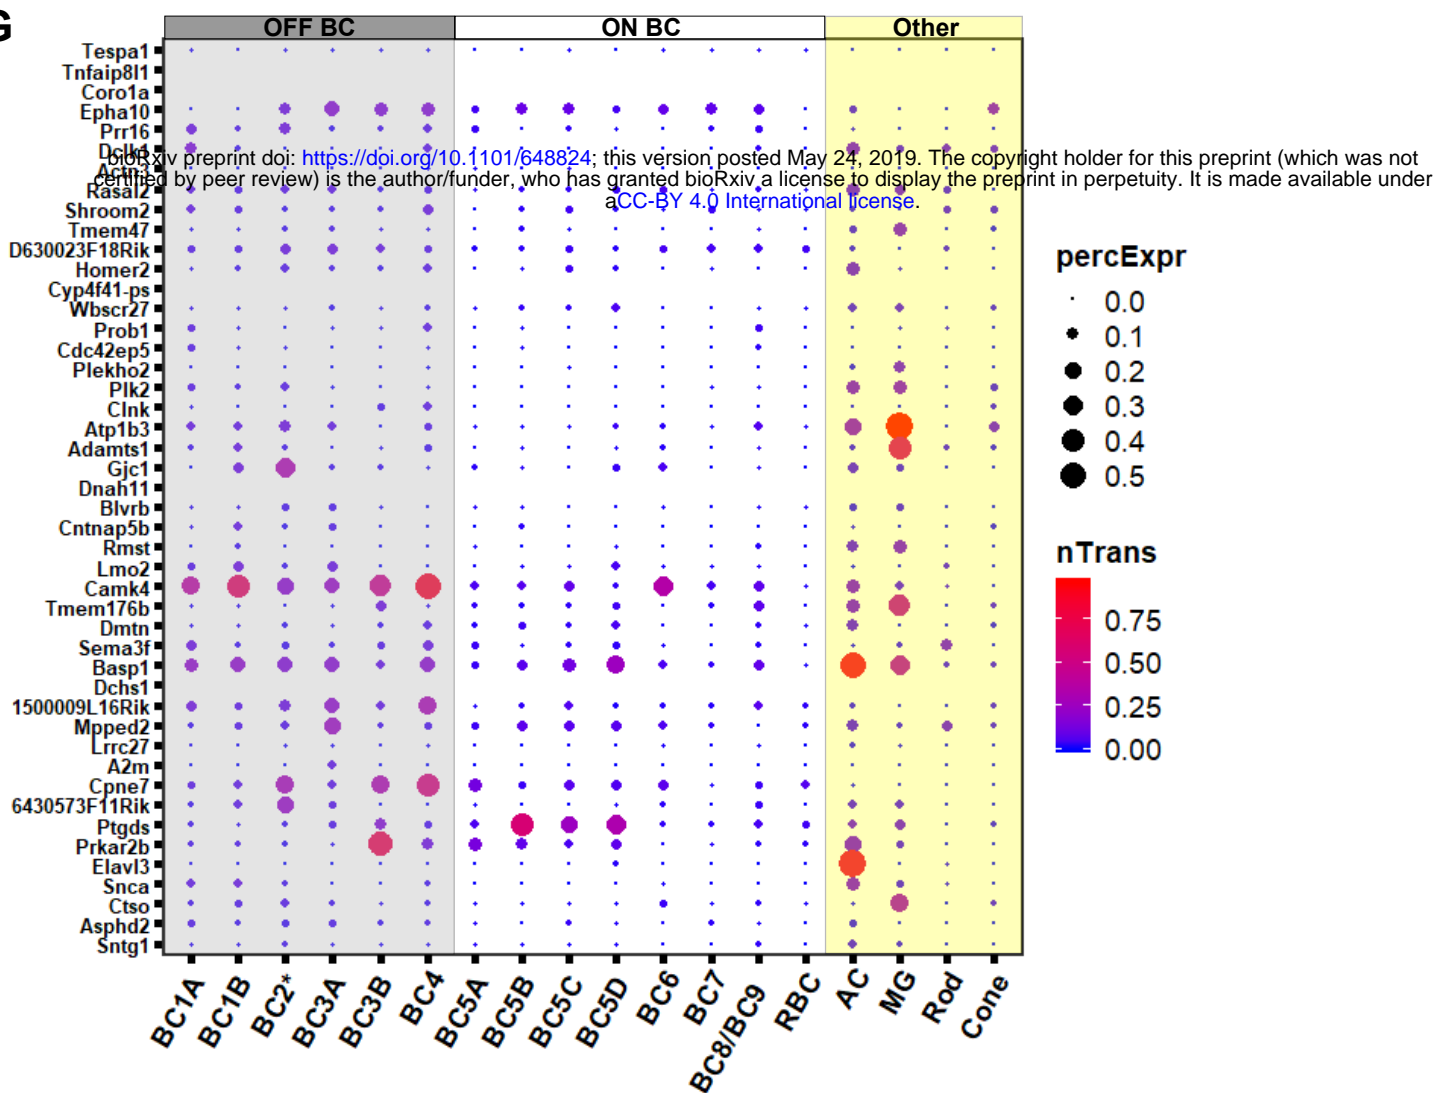**H**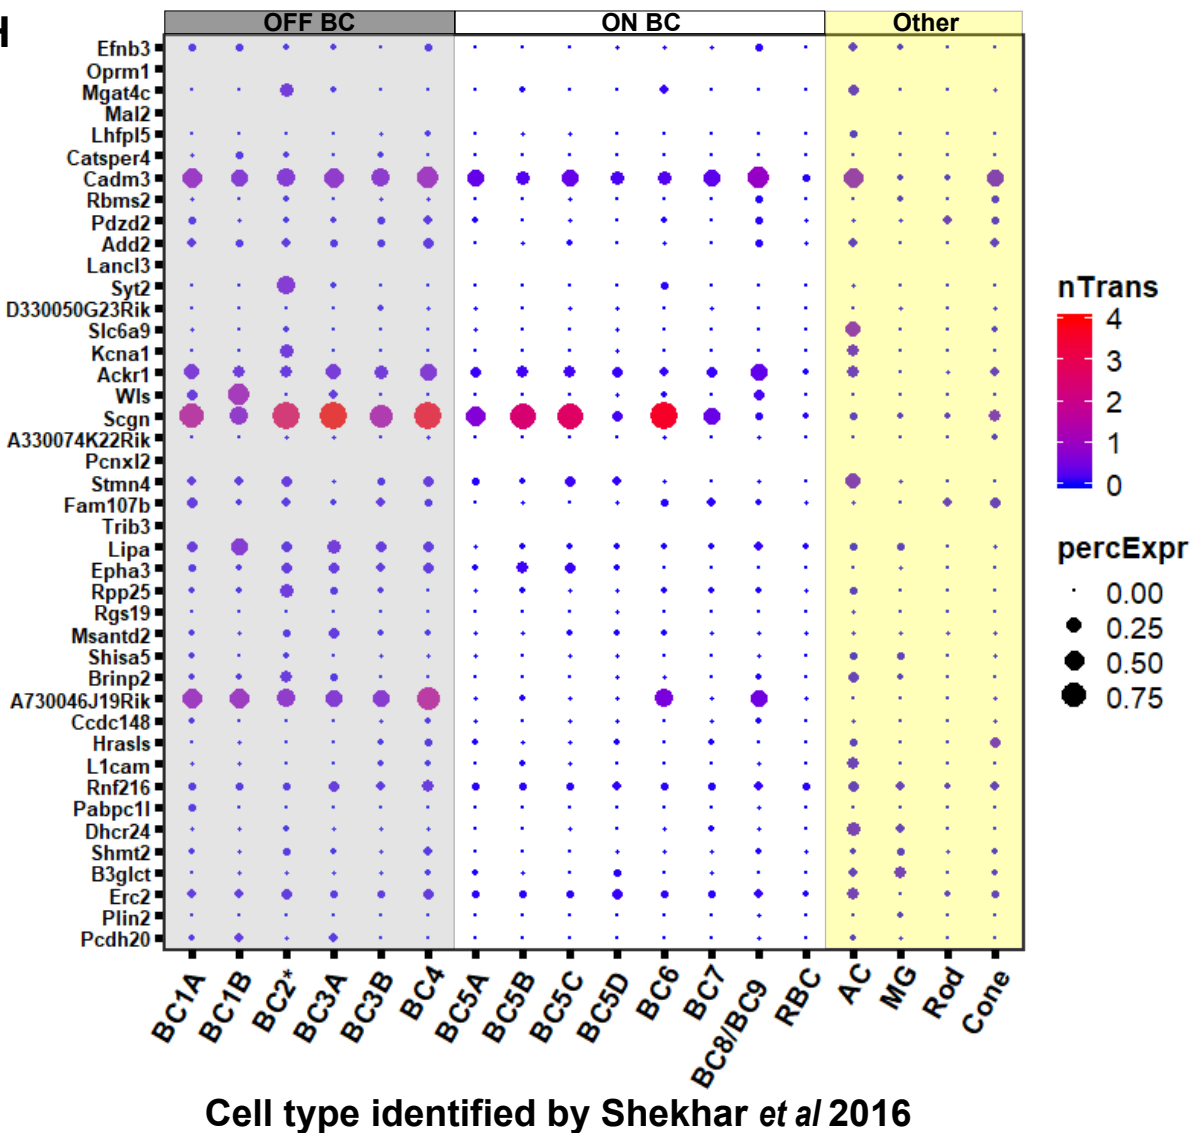

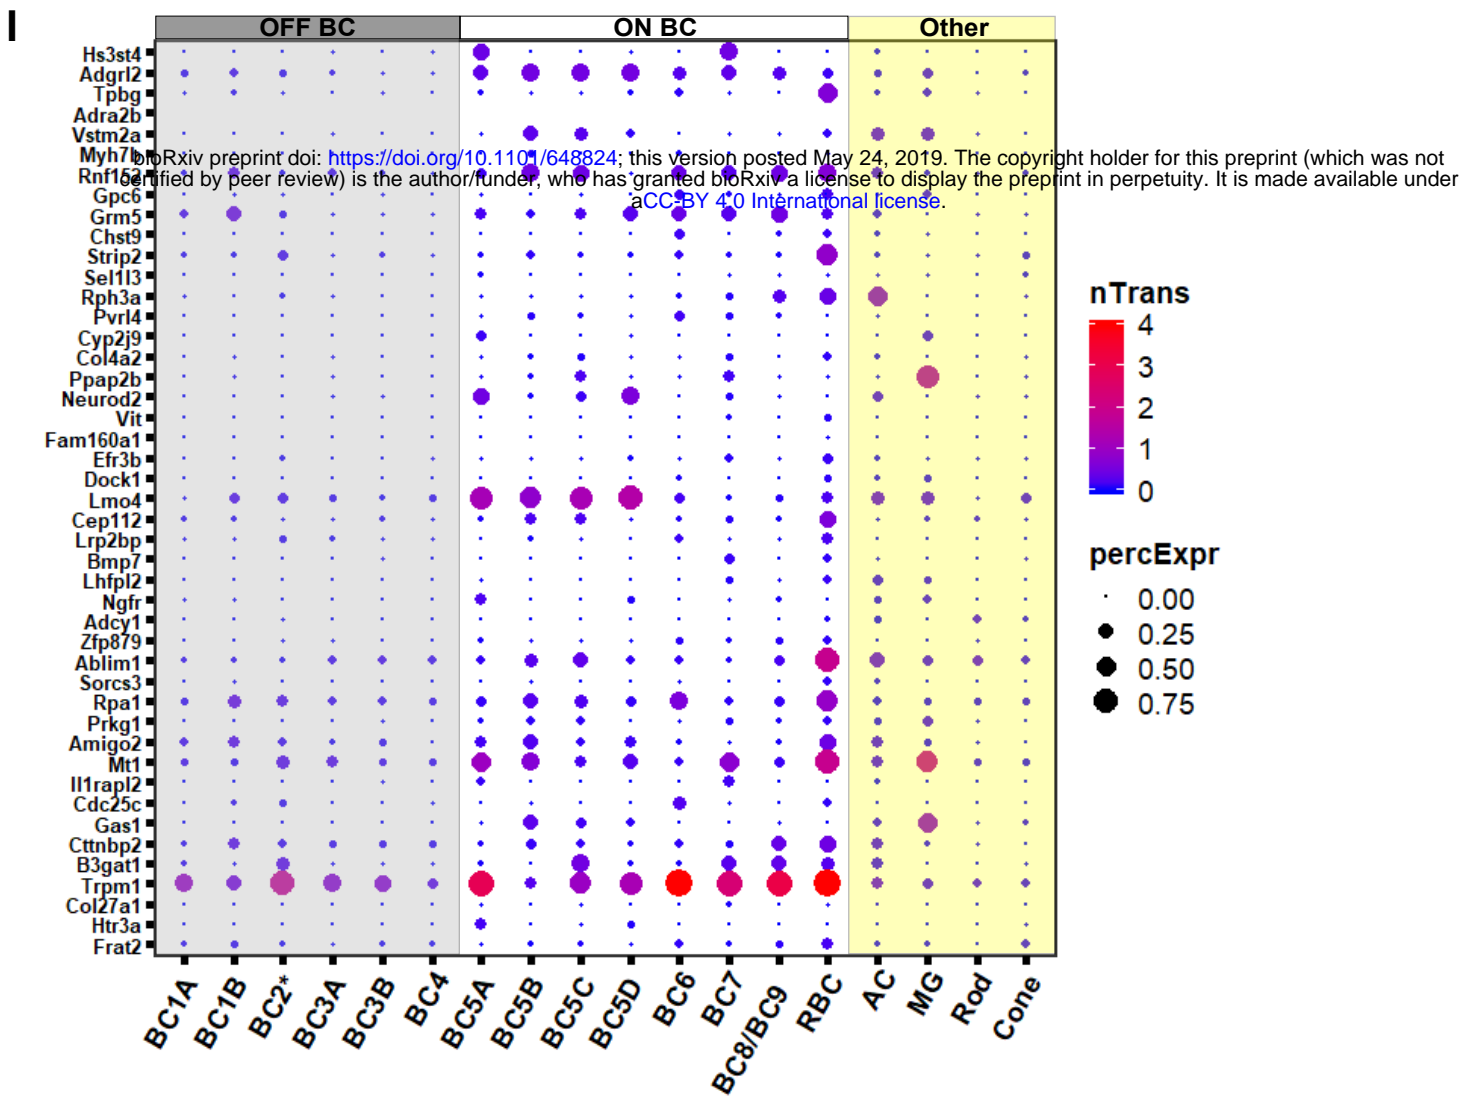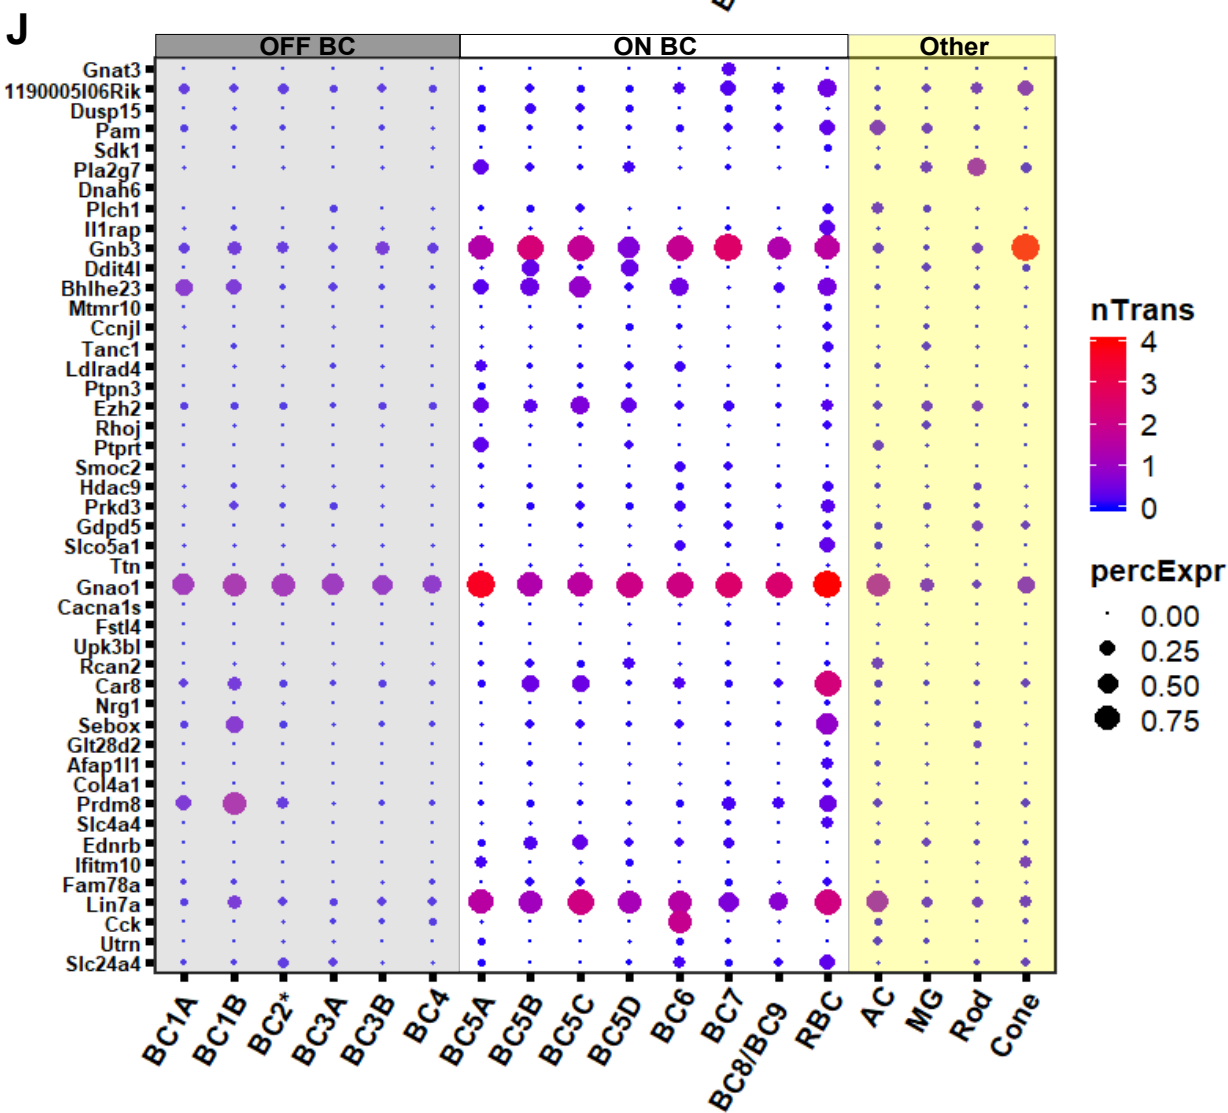

Cell type identified by Shekhar *et al* 2016

**K**

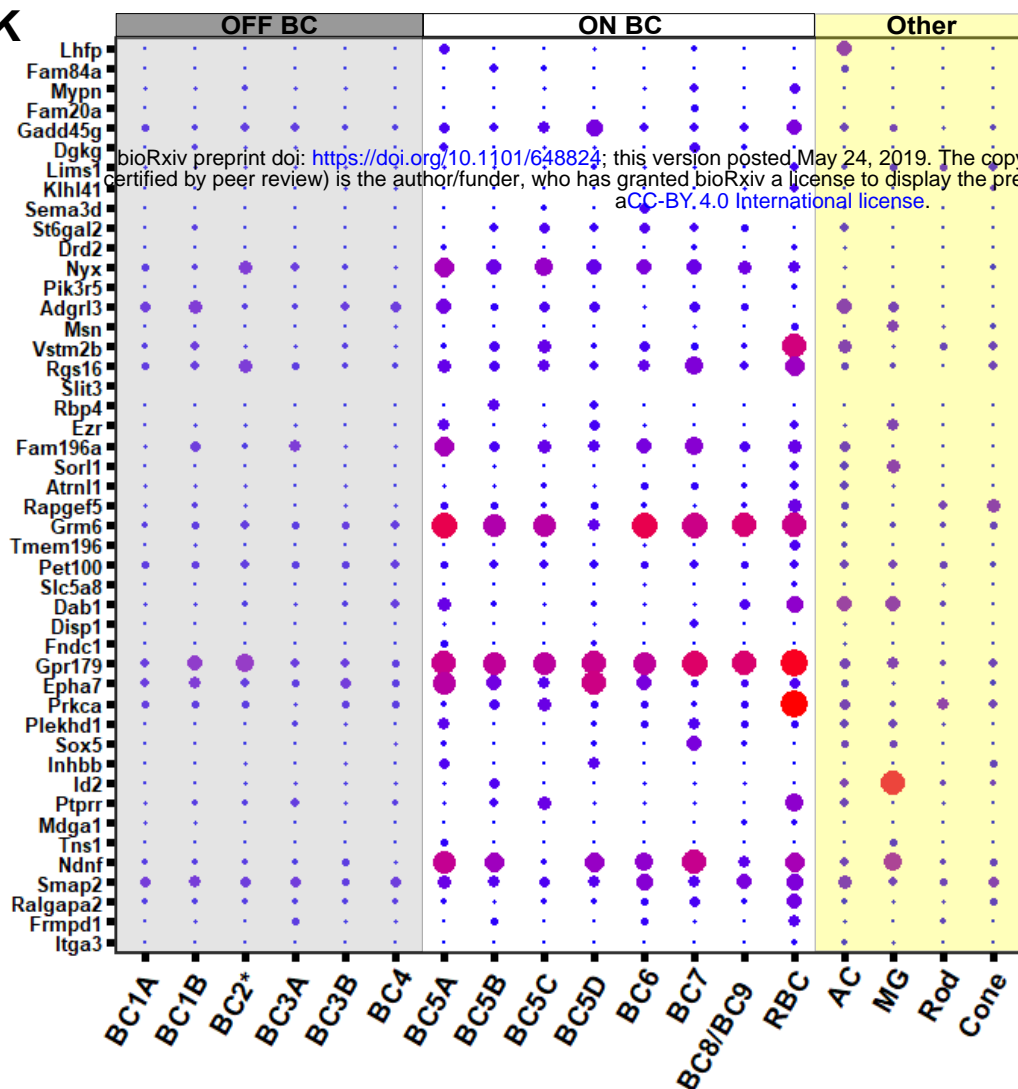

**percExpr**

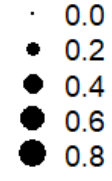

**nTrans**

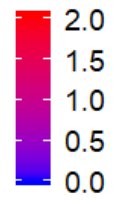

**L**

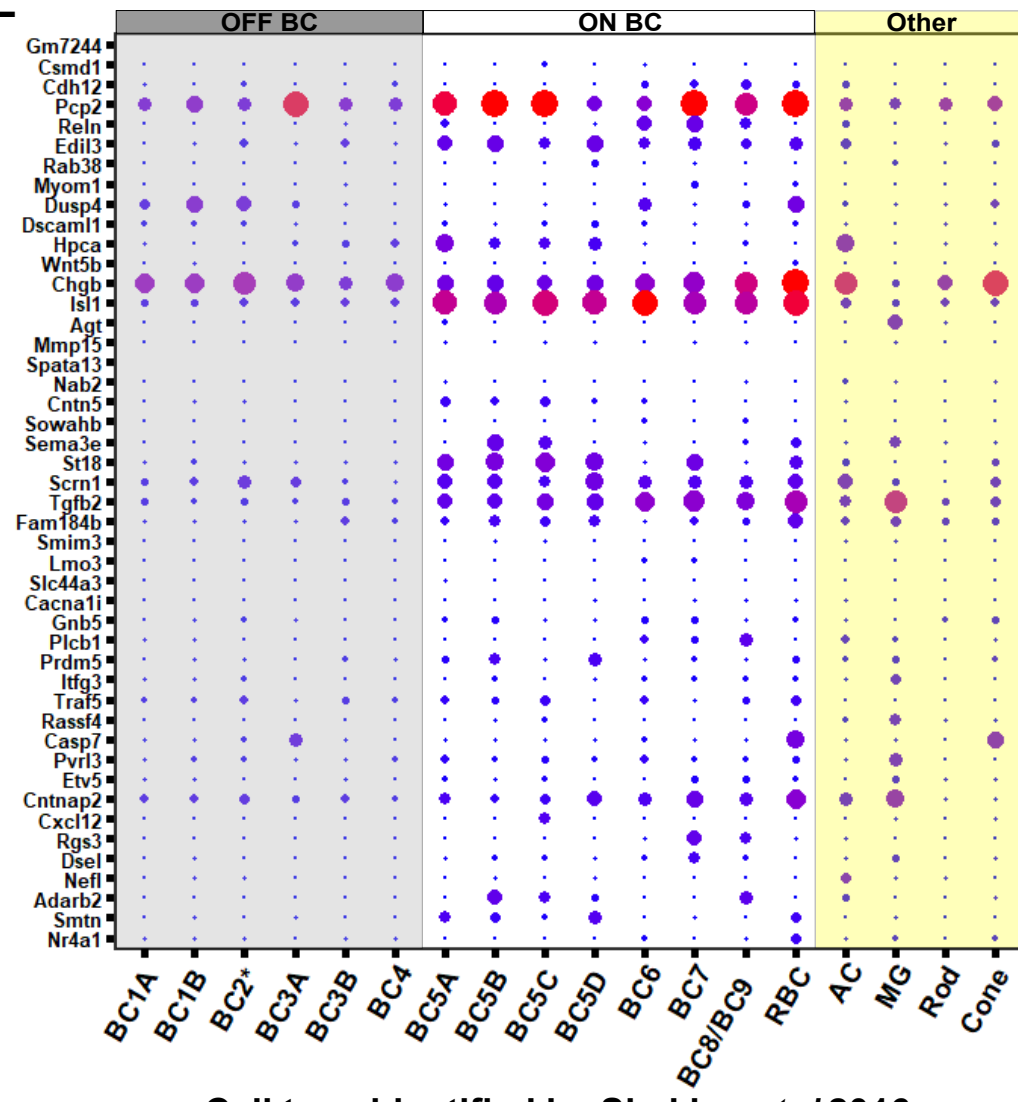

**nTrans**

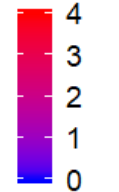

**percExpr**

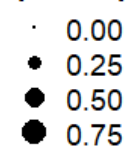

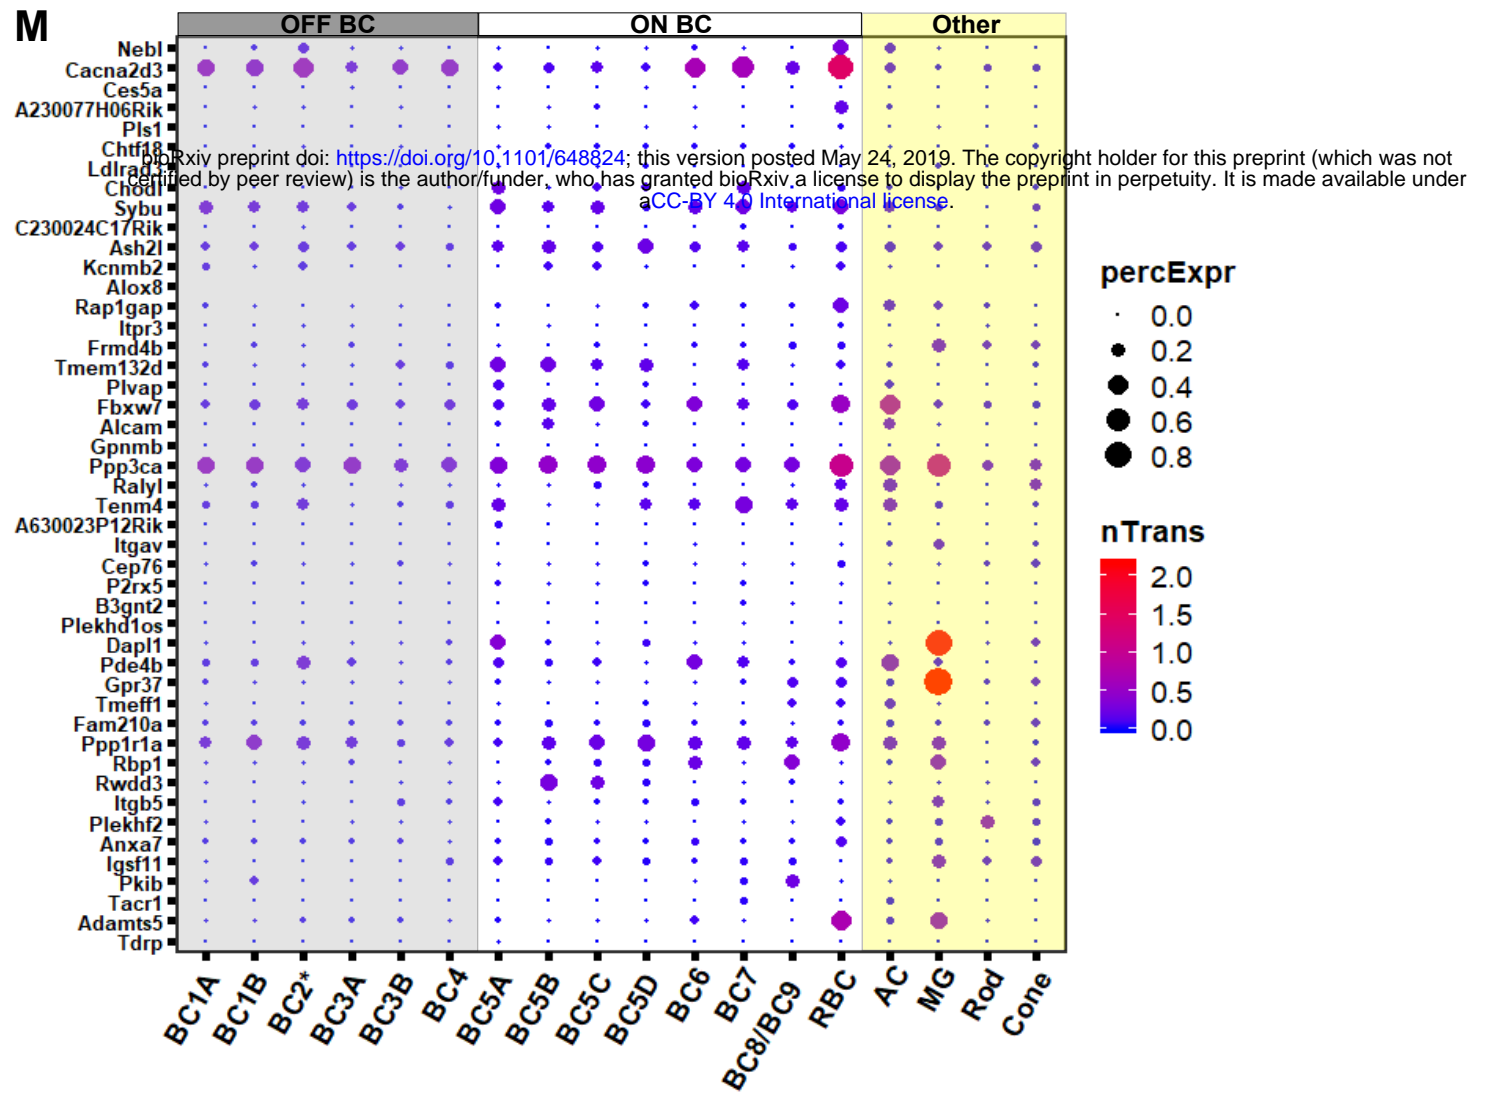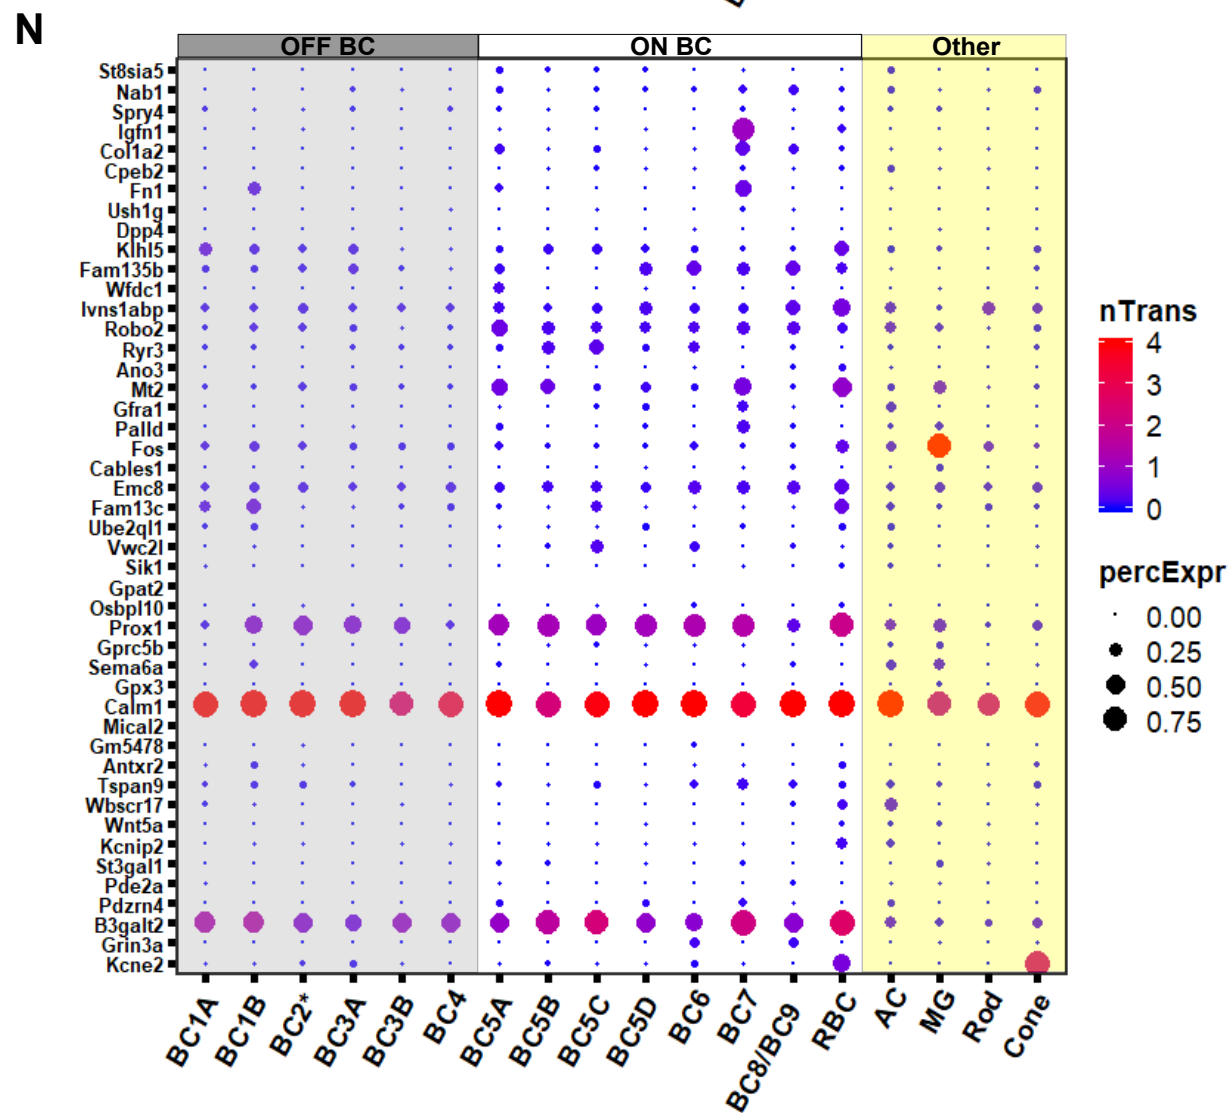

Cell type identified by Shekhar *et al* 2016

O

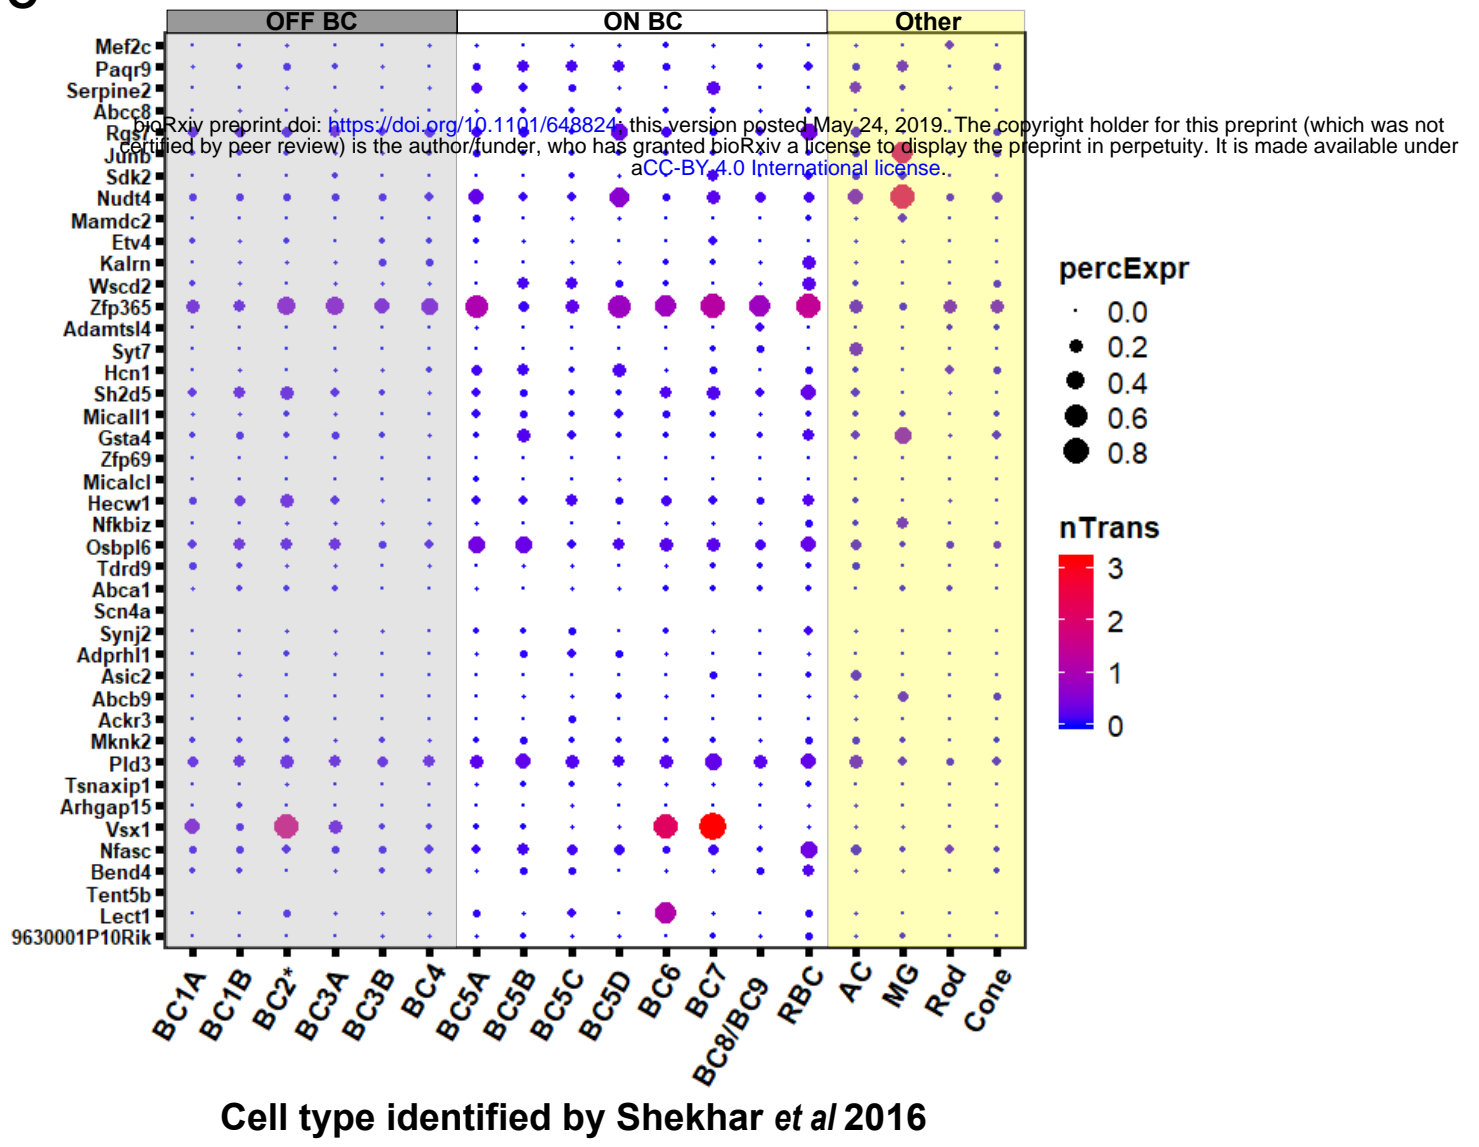

**Supplementary Figure S2. Single-cell expression profiles of genes differentially expressed between ON and OFF bipolar cells.** Dot plots present single-cell expression data obtained by Shekhar *et al.*<sup>44</sup> using Drop-seq for genes identified in this study by bulk RNA-seq as differentially enriched in ON or OFF bipolar cells. Drop-seq data was available for 630 of the 680 genes, which are sorted by lowest adjusted p-value. **(A-H)** Genes enriched in OFF bipolar cells. **(I-O)** Genes enriched in ON bipolar cells. nTrans = mean number of transcripts expressed per cell in each cluster identified as a bipolar cell type. PercExpr = percentage of cells within each cluster found to express the indicated gene.



**A**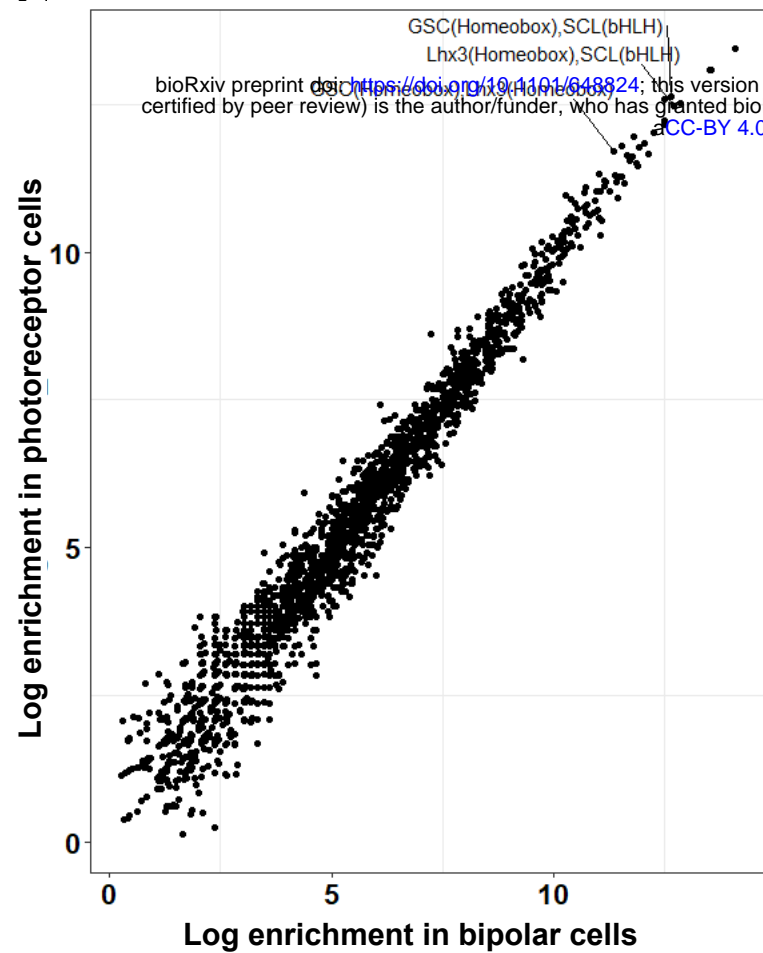**B**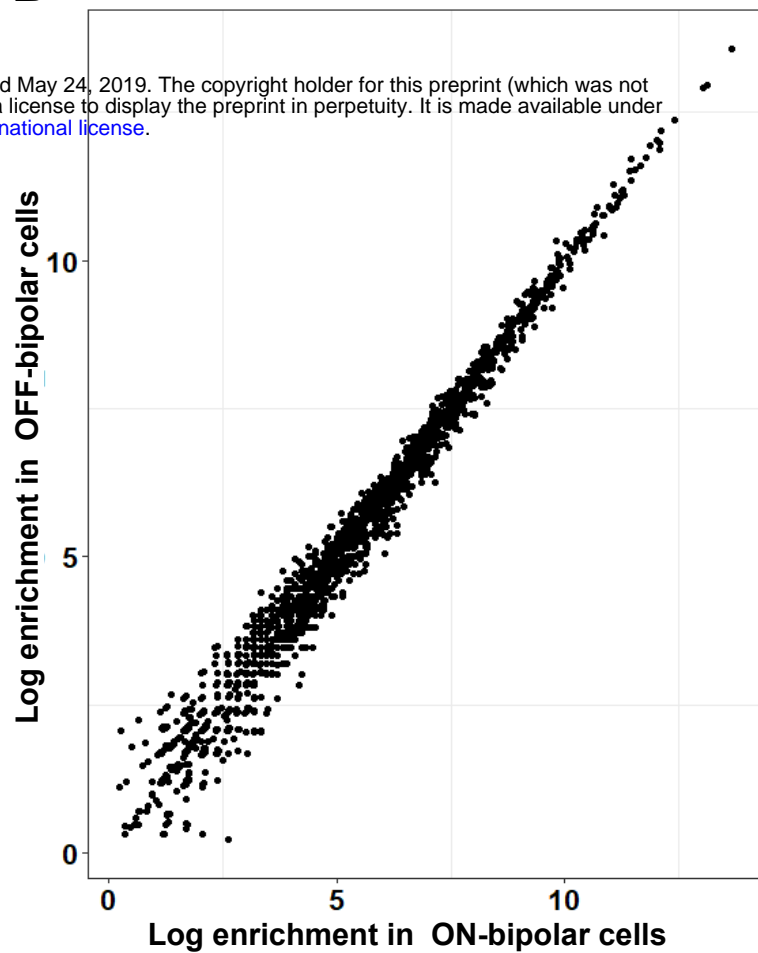

**Supplementary Figure S3. Co-enrichment of motifs in photoreceptor and bipolar cells.**

**(A)** Scatterplot comparing enrichment for pairs of 67 non-redundant motifs from HOMER within enhancer (TSS-distal) regions of photoreceptors (y-axis) and bipolar cell (x-axis). Each point represents a motif pair (motifs present within the same peak). Motif pairs that are highly enriched in both tissues include individual motifs recognized by GSC (K50 HD), LHX3 (Q50 HD) and SCL (E-box). **(B)** Scatterplot as in A, showing enrichment of motif pairs between ON and OFF bipolar cells.

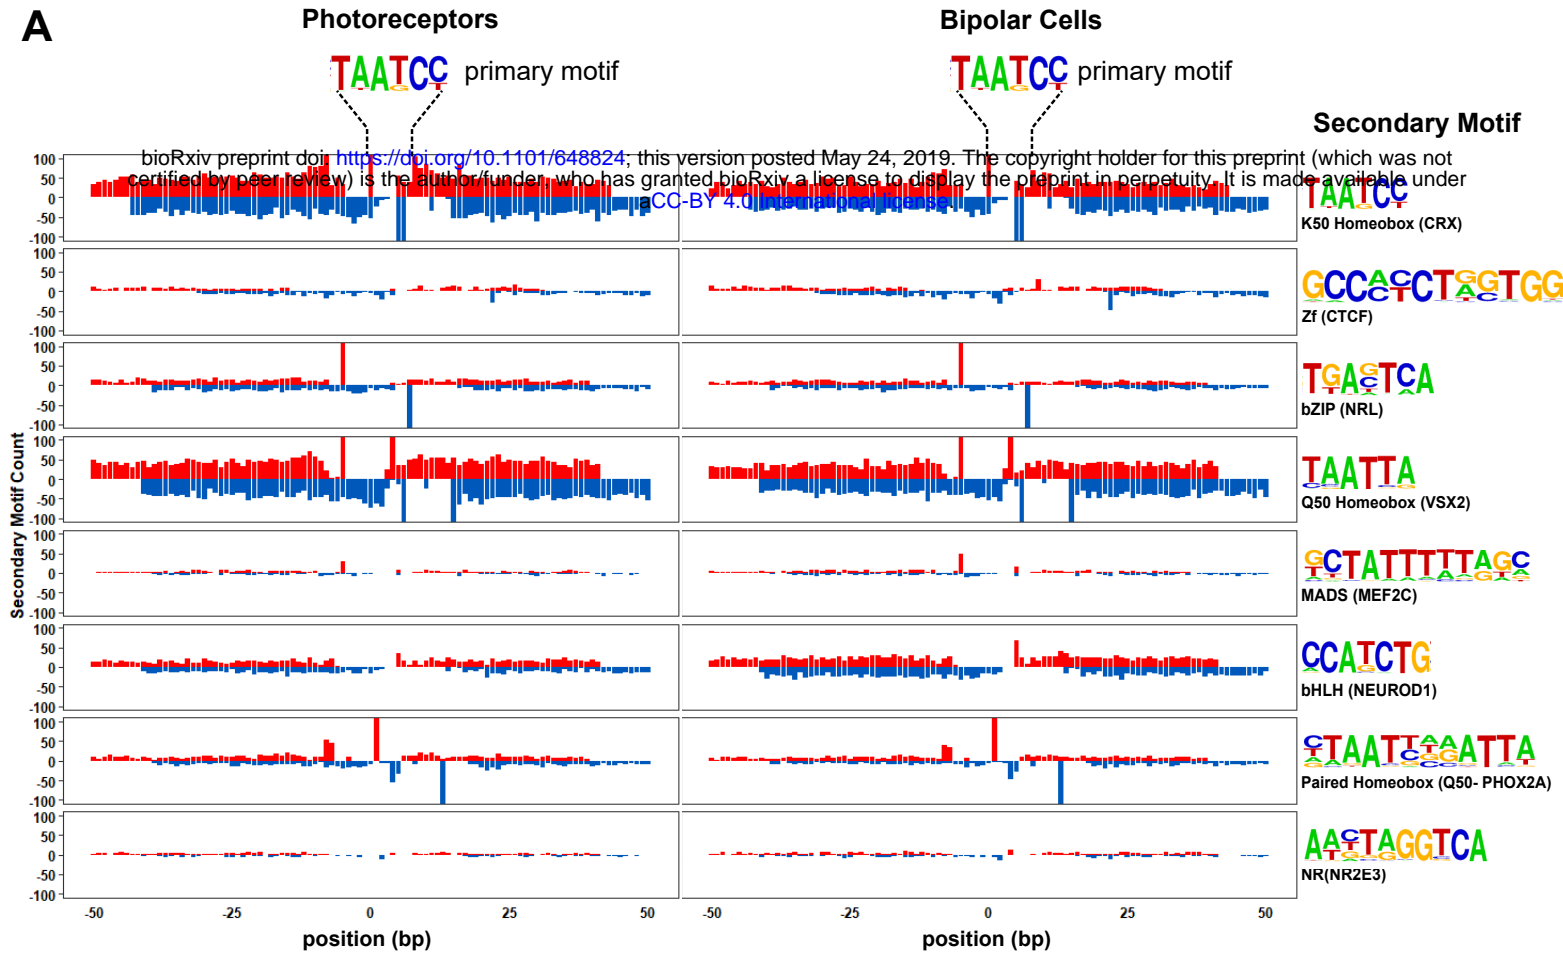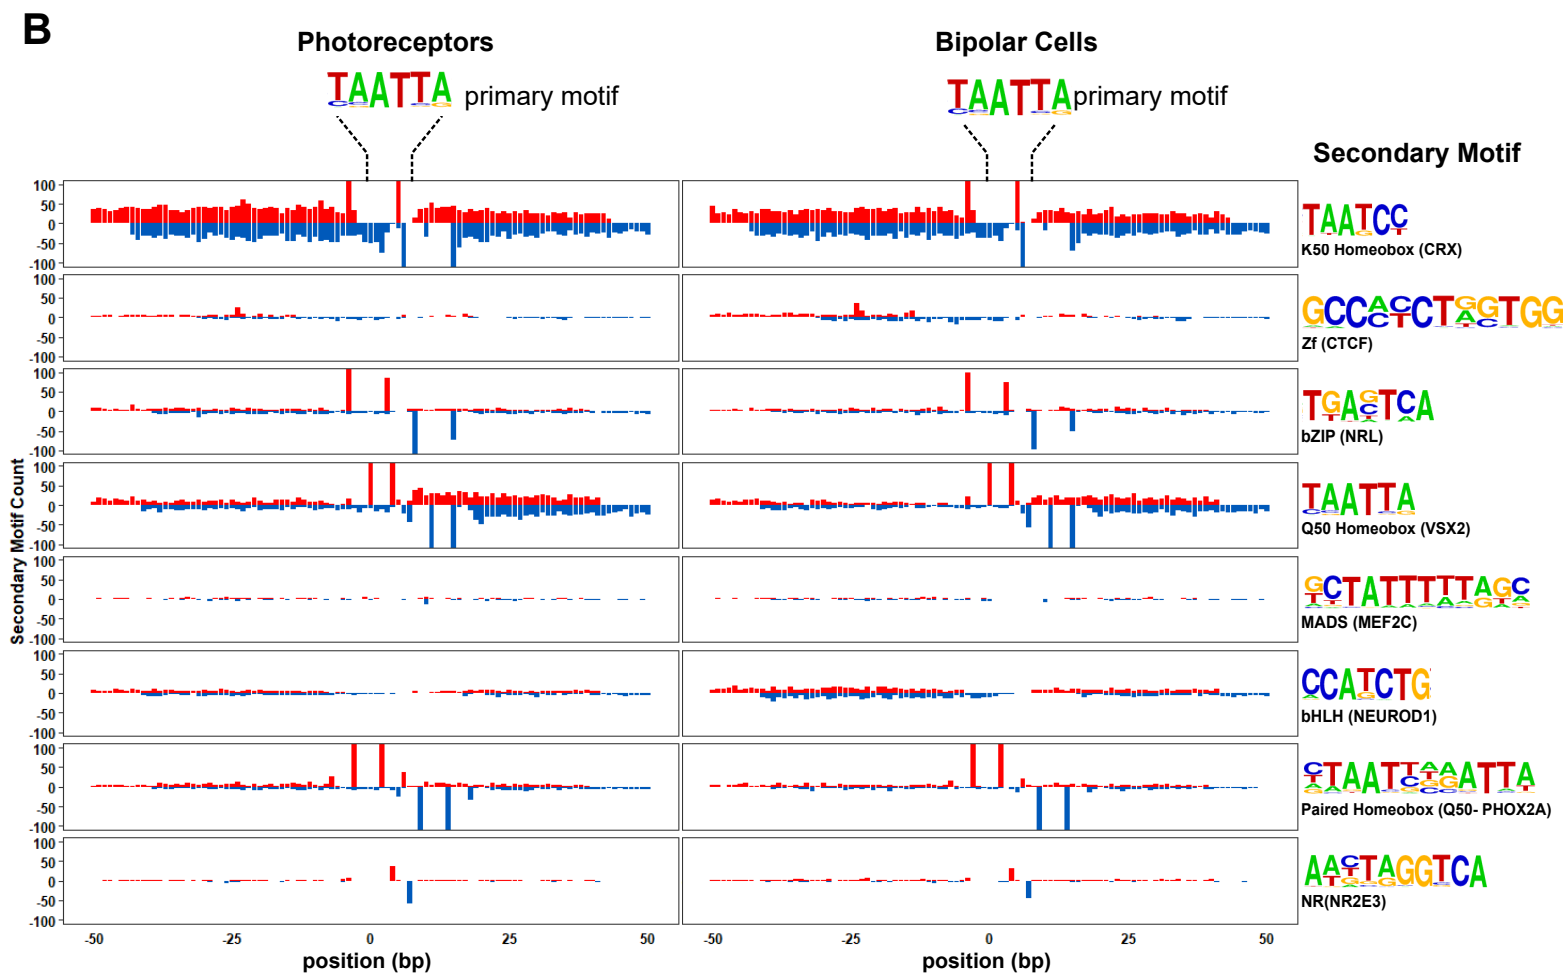

**Strand**

- Plus
- Minus

**Supplementary Figure S4. Motif spacing and orientation in photoreceptor and bipolar cells.** Peaks from photoreceptors (left) and bipolar cells (right) are centered on K50 HD (A) or Q50 HD motifs (B). Per base-pair counts for secondary motifs (PWM and example TFs shown at the far right) are plotted in a 100 bp window surrounding the primary motif, with counts on the plus strand shown in red, and the minus strand shown in blue. The y-axis was limited to  $\pm 100$ .

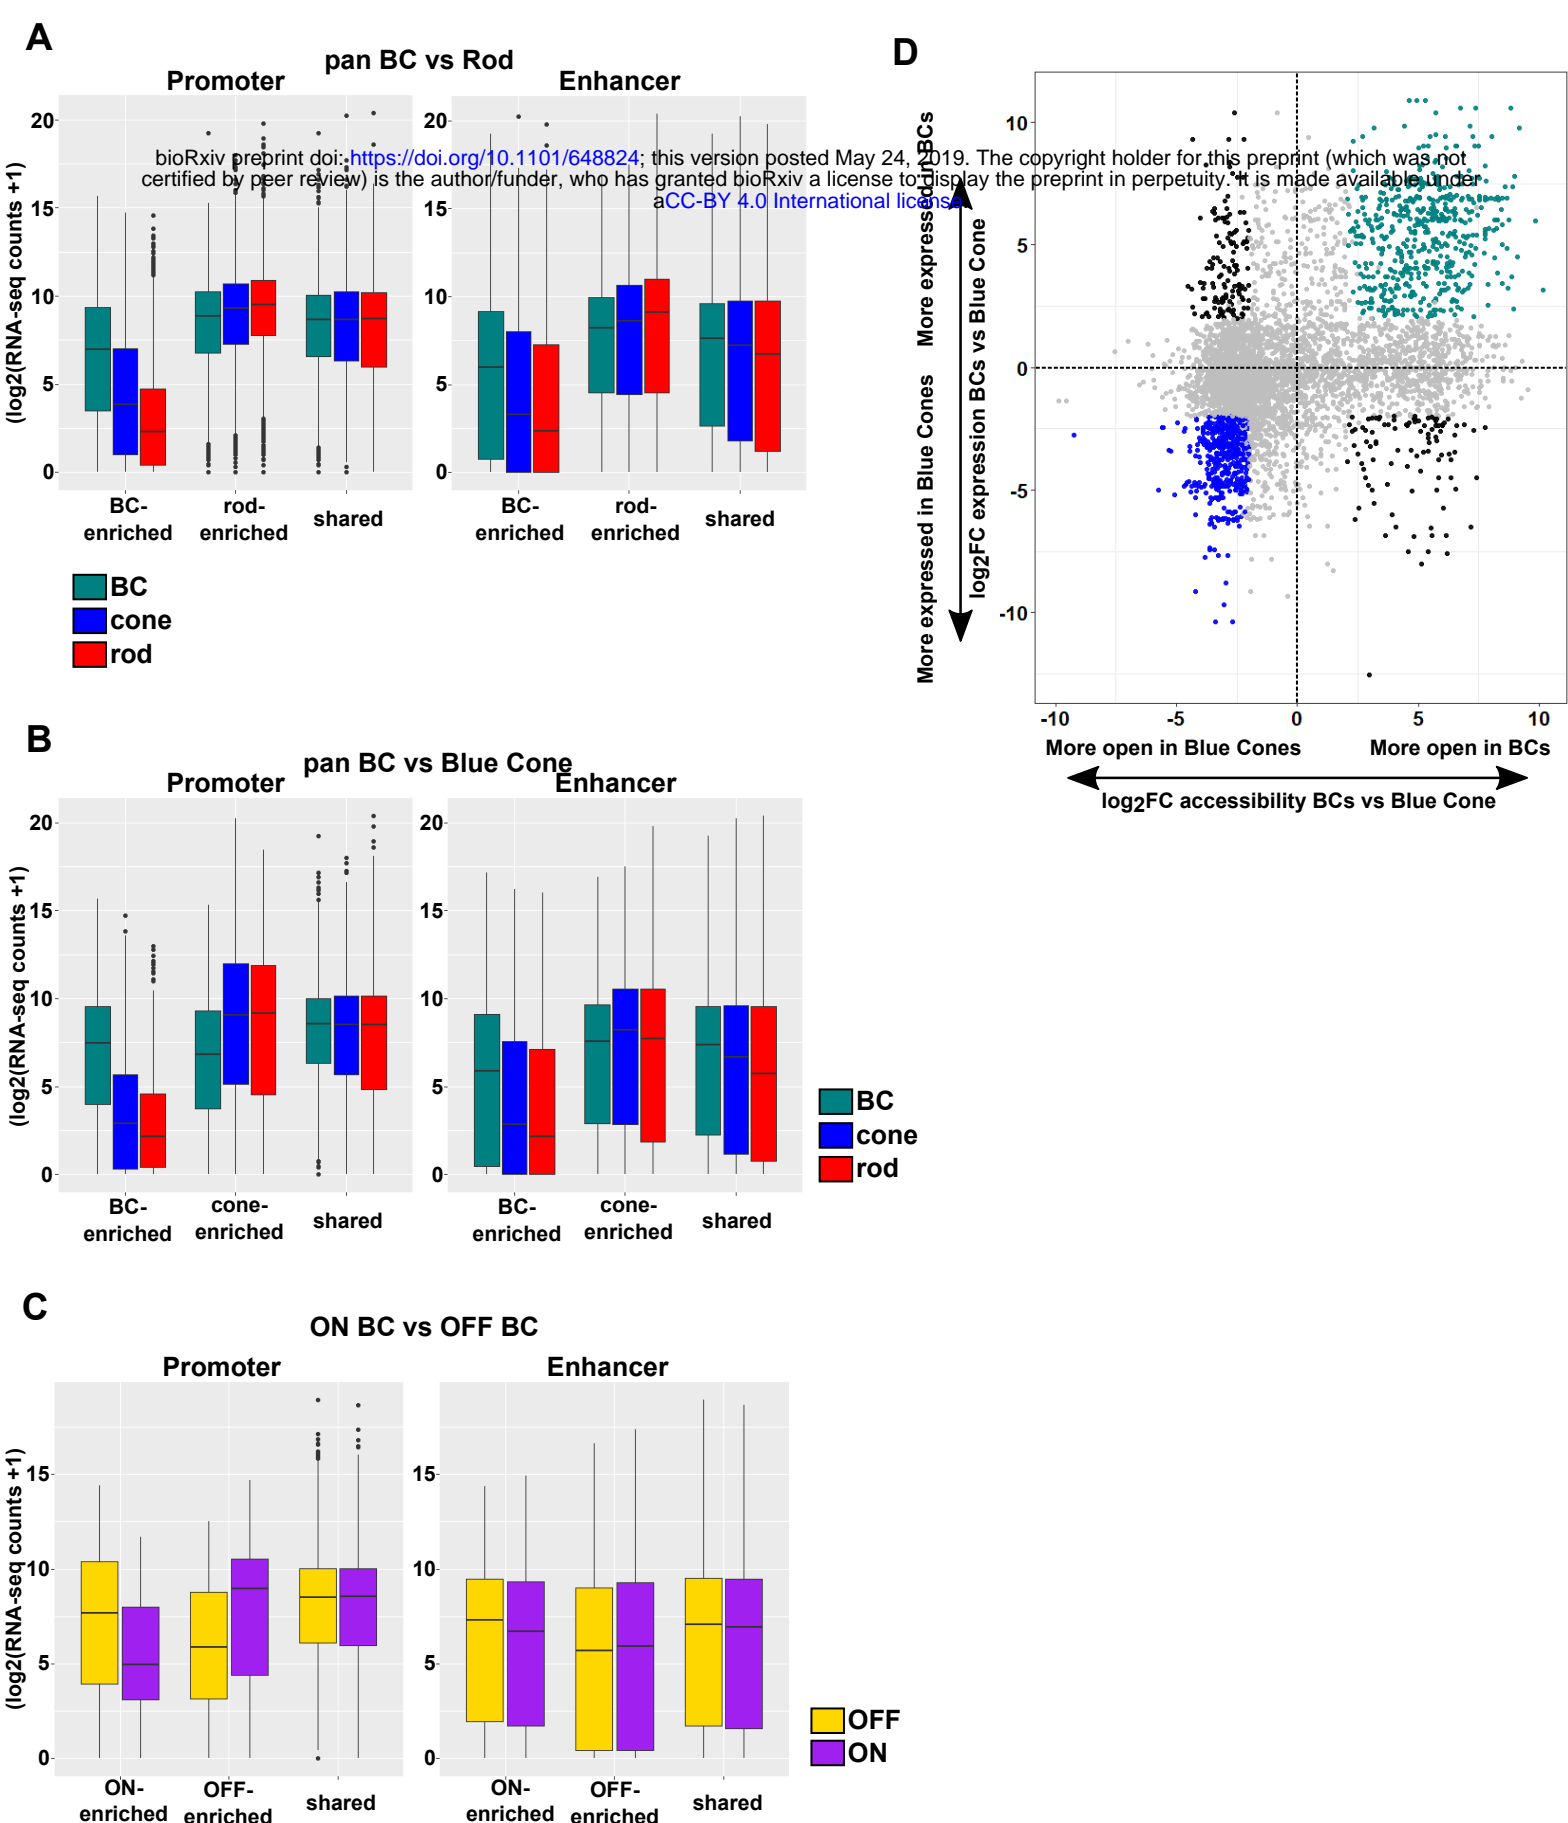

**Supplementary Figure S5. Correlation between chromatin accessibility and expression of associated genes.**

**A-C.** Differentially enriched ATAC-seq peaks were mapped to genes based on proximity to the nearest TSS. Peaks within -1000 bp upstream and +100 bp downstream of a TSS are defined as 'Promoter' peaks, whereas intergenic or intronic peaks are defined as 'Enhancer' peaks. Boxplots show RNA-seq expression data for genes associated with peaks that are differentially accessible in **(A)** pan BC vs rod, **(B)** pan BC vs blue cone and **(C)** ON bipolar cells vs OFF bipolar cells. **(D)** Scatterplot as in Fig. 5B showing chromatin accessibility and associated gene expression of ATAC-seq peaks identified in Fig. 5A in bipolar cells and blue cones. Peaks with four-fold greater accessibility and associated gene expression (FDR < 0.05 for both accessibility and gene expression) in bipolar cells are shown in green (n = 542), while those of blue cones are in blue (n = 505). Shared peaks and those associated with genes that have less than four-fold differences in expression are in grey. Peaks with discordant chromatin accessibility and associated gene expression (n = 234) are shown in black.

**A****GO Biological Process**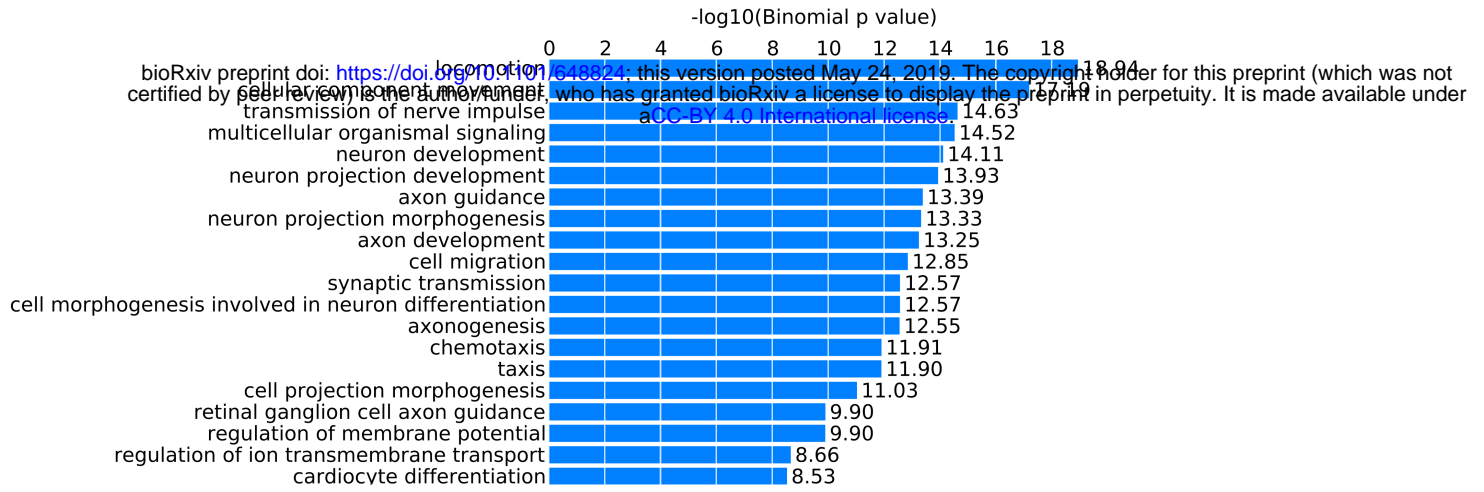**B****GO Biological Process**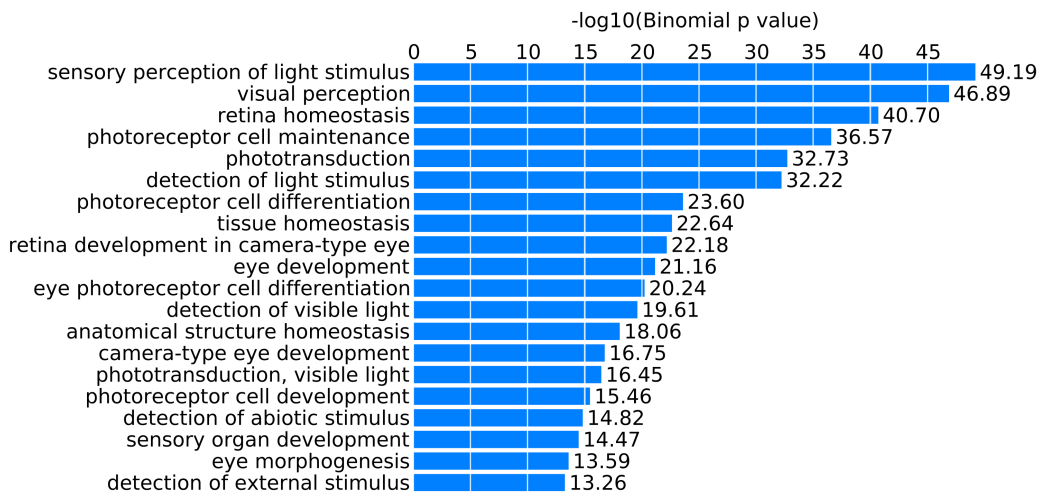

**Supplementary Figure S6. Gene Ontology (GO) annotation of peaks exhibiting correlated chromatin accessibility and associated gene expression.** GO terms enriched in peaks that show positive correlations between chromatin accessibility and assigned gene expression in (A) bipolar cells or (B) photoreceptors. Peaks identified in Figure 5B and Figure S5E as bipolar-enriched (green) or photoreceptor-enriched (red or blue for rods or blue cones, respectively) were combined to create unique lists for bipolar cells (n = 833) and photoreceptors (n = 901) which were analyzed using GREAT<sup>55</sup>.

408 **Supplementary table legends**

409 **Supplementary Table S1. Biological replicate and sequencing metrics for ATAC-seq and RNA-seq.**

410 ‘Raw sequencing reads’ are the number of paired reads for each sample. ‘Processed reads’ are those reads  
411 remaining after filtering out those that are improperly paired, have poor mapping quality, align to the  
412 mitochondrial genome, align to ENCODE blacklisted regions, or arise from PCR duplicates. RIN = RNA  
413 integrity number.

414

415 **Supplemental Table S2. Primers used in this work.** Primers used in creation of *Gnb3* promoter constructs  
416 and in qPCR experiments are listed.

417

418 **Supplemental Table S3. Datasets and accessions.**

419

420 **Supplemental Table S4. Annotated ATAC-seq peaks and counts.** Raw count data for all ATAC-seq  
421 peaks identified in photoreceptor and bipolar cell populations. Peaks identified in individual replicates from  
422 each cell type are shown on separate sheets.

423

424 **Supplemental Table S5. Differentially expressed genes.** Genes identified as differentially expressed  
425 between aggregate bipolar cells and either rod or blue cone, and between ON and OFF bipolar cell  
426 populations are shown on separate sheets. ‘Specificity’ indicates which cell type expressed the gene more  
427 highly. For pan BC vs rod and cone, genes identified as putative transcription factors are identified by their  
428 TF family. Genes absent from the Drop-seq data shown in Figure S2 are indicated among those that are  
429 differentially expressed between ON and OFF bipolar cells.

430

431 **Supplemental Table S6. GO analysis of differentially expressed genes.** Enriched GO terms for  
432 biological processes obtained from geneontology.org. Outputs for genes enriched in photoreceptor and  
433 bipolar cells are shown on separate sheets. Input gene lists were filtered based on fold-change in expression  
434 and minimum read counts to identify those most highly enriched in photoreceptor (n=818) and bipolar cells  
435 (n=832). A list of all genes identified by RNA-seq in either cell class was used as a reference.

436

437 **Supplemental Table S7. Differentially accessible regions.** ATAC-seq peaks, normalized read counts,  
438 fold-change values, adjusted p-values and assigned genes are listed on separate sheets for each comparison.  
439 ‘Specificity’ indicates the cell type in which the peak is more highly accessible. ‘Shared-unfiltered’ peaks  
440 are those that are not differentially accessible when comparing bipolar cells versus photoreceptors (fold-  
441 change values  $<2$  and  $>-2$ ). ‘Retina’ peaks are those shown in Figure 5A, and have been filtered to remove  
442 those accessible in B cell, brain and liver. Peaks with correlated gene expression identified in Figure 5C  
443 and S5D are indicated

444

445 **Supplemental Table S8. Known motifs enriched in enhancers of bipolar cell populations.** Enrichment  
446 of all 319 motifs in the HOMER database for aggregate, ON-, and OFF-bipolar cells, each on separate  
447 sheets. A comparison of the proportional enrichment for each motif between aggregate bipolar cells and  
448 rod, blue and green cones is included on a separate sheet. A complete list of sequence logos and position  
449 weight matrices for individual motifs is available online in the HOMER motif database:  
450 <http://homer.salk.edu/homer/motif/HomerMotifDB/homerResults.html>.

451

452

453

## 454 **Acknowledgements**

455 The authors would like to thank Leo Volkov and Yohey Ogawa for critical reading of the manuscript. The  
456 *Otx2*-GFP mouse line was a generous gift from Dr. Thomas Lamonerie (Université Côte d'Azur), and the  
457 *Grm6*-YFP line was a generous gift from Dr. Daniel Kerschensteiner (Washington University). We also  
458 credit the ENCODE consortium for the DNase-seq datasets, the Genome Technology Access Core (GTAC)  
459 in the Department of Genetics at Washington University in St. Louis for next-generation sequencing, and  
460 the Flow Cytometry Core in the Department of Pathology and Immunology at Washington University in  
461 Saint Louis for FACS services. This work was supported by the National Institutes of Health (EY025196,  
462 EY026672, and EY024958 to J.C.C. and T32EY013360 and F32EY029571 to D.P.M.)

463

## 464 **Competing interests**

465 The authors of this manuscript have no competing interests to declare.

466

## 467 **Materials and Methods**

468 **Mouse models.** All animal experiments were carried out in accordance with the regulations of the IACUC  
469 at Washington University in St. Louis. Retinal dissociation and FAC sorting were carried out using *Otx2*-  
470 GFP or *Otx2*-GFP; *Grm6*-YFP mice. All *Otx2*-GFP mice were heterozygous for a GFP cassette inserted at  
471 the C-terminus of the endogenous *Otx2* locus<sup>37</sup>. The *Grm6*-YFP line harbors a YFP transgene driven by the  
472 *Grm6* promoter<sup>38</sup>. All electroporation experiments were carried out in CD1 mice.

473

474 **Retinal dissociation and FACS.** Following dissection, retinas of 6-8 week old mice were dissociated with  
475 papain as described previously<sup>67</sup>. Briefly, two retinas were incubated in 400 µl of calcium/magnesium free  
476 Hanks' Balanced Salt Solution (HBSS) (Thermo Fisher) containing 0.65 mg papain (Worthington  
477 Biochem) for 10 min at 37°C. Cells were then washed in a DMEM (Thermo Fisher) solution containing 100

478 units DNase1 (Roche) and incubated an additional 5 minutes at 37°C. Cells were then resuspended in 600µl  
479 of sorting buffer (2.5 mM EDTA, 25 mM HEPES, 1% BSA in HBSS) and used directly for sorting. Cells  
480 were sorted on a FACS Aria-II (BD biosciences) with gates based on forward scatter, side scatter, and GFP  
481 fluorescence. OFF bipolar cell populations (*Otx2*-GFP<sup>+</sup>;*Grm6*-YFP<sup>+</sup>) were immediately sorted a second  
482 time to increase purity.

483

484 **Generation of reporter constructs.** An 820 bp region encompassing part of the *Gnb3* 5' UTR and  
485 upstream sequence was amplified from mouse genomic DNA. Site-directed mutagenesis by overlap  
486 extension was used to modify K50 sites<sup>68</sup>. The resultant PCR products were digested and ligated into GFP  
487 or DsRed reporter vectors derived from pCAGGS<sup>69</sup>. After verification by sequencing, plasmid DNA was  
488 resuspended in PBS at a concentration of ~6-7µg/µl prior to injection. All primers are listed in Table S2.

489

490 ***In-vivo* and explant electroporation.** *In-vivo* subretinal injection and electroporation of newborn CD1  
491 mice was performed as previously described<sup>70</sup>. Briefly, mice were first anesthetized on ice. A 30-gauge  
492 needle was then used to incise the eyelid and puncture the sclera, and a Hamilton syringe with a 33-gauge  
493 blunt-tipped needle was used to inject the DNA into the subretinal space. Tweezer electrodes placed across  
494 the head were then used to electroporate with 5 square pulses of 80 volts and 50 millisecond duration at  
495 950 millisecond intervals. Explant electroporation was carried out as described previously<sup>69</sup>, except that the  
496 electroporation chamber contained a solution of 0.5µg/µl DNA in PBS.

497

498 **Retinal tissue sectioning and imaging.** Eyes were removed at P21, punctured with a 26-gauge needle, and  
499 incubated in 4% paraformaldehyde for 5 minutes before dissection to remove the cornea. The lens was  
500 removed, and eyes were then incubated for an additional 45 minutes in 4% paraformaldehyde. Eye cups  
501 were next washed in PBS and incubated overnight at 4°C in 30% sucrose-PBS. The following day, eye cups



502 were incubated in a 1:1 mixture of OCT compound (Sakura) and sucrose-PBS before being flash frozen in  
503 OCT and stored at -80°C. Retinal sections of 14 µm were cut using a cryostat (Leica CryoCut 1800),  
504 mounted on Superfrost Plus slides (Fisher), and stored at -20°C. Prior to placement of cover slips, slides  
505 were washed with PBS to remove OCT. The sections were then stained with DAPI, and coverslips were  
506 mounted using Vectashield mounting medium (Vectorlabs). Retinal sections were imaged on a Zeiss 880  
507 laser-scanning confocal microscopy in the Washington University Center for Cellular Imaging (WUCCI)  
508 Core.

509

510 **ATAC-seq.** Transposition and library preparation from sorted cell populations were performed as  
511 previously described<sup>71</sup>. Briefly, 30,000-100,000 sorted cells were pelleted at 500 G and washed twice in  
512 ice-cold PBS before lysis. Transposition reactions were incubated at 37°C for 30 minutes and purified using  
513 a Qiagen MiniElute PCR Purification kit. Libraries were amplified with Phusion High-Fidelity DNA  
514 Polymerase (NEB). Cycle number was calibrated by a parallel qPCR reaction. Gel electrophoresis was used  
515 to assess library quality, and final libraries were quantified using KAPA Library Quantification Kit (KAPA  
516 Biosystems). Equimolar concentrations of each library were pooled and run on an Illumina HiSeq2500 to  
517 obtain 50 bp paired-end reads.

518

519 **ATAC-seq, DNase-seq, and RNA-seq data processing.** ATAC-seq and RNA-seq reads from bipolar cell  
520 populations were processed in an identical manner to those previously obtained from rod and cone  
521 photoreceptor cells<sup>30</sup>. ATAC-seq reads were aligned to the GRCm38/mm10 mouse genome assembly using  
522 Bowtie2 (v2.3.5) with a max fragment size of 2000<sup>72</sup>. Alignments were filtered using SAMtools (v1.9)<sup>73</sup>,  
523 PCR duplicates were removed using Picard (v2.19.0) (<https://broadinstitute.github.io/picard/>), and  
524 nucleosome-free reads were selected by removing alignments with an insertion size greater than 150 bp.  
525 Peaks were called using MACS2 (v2.1.1)<sup>74</sup> and annotated with HOMER (v4.8)<sup>47</sup>. DNase-seq datasets

526 generated by ENCODE<sup>46</sup> were downloaded as FASTQ files from <https://www.encodeproject.org/> and  
527 processed in the same manner as ATAC-seq data. RNA-seq reads were aligned to the GRCm38/mm10  
528 using STAR (v2.7.0d)<sup>75</sup>, with an index prepared for 50 base-pair reads and the RefSeq gene model, and  
529 read counts were calculated using HTSeq (v1.9)<sup>76</sup>. All datasets are listed in Table S3.

530

531 **Transcription factor binding site motif analysis.** Motif enrichment, co-enrichment, and spacing analyses  
532 for ATAC-seq and DNase-seq datasets were performed as described previously using HOMER (v4.8)<sup>30,47</sup>.  
533 Differential motif enrichment was determined using a test of equal proportions (R stats v3.5.3) to compare  
534 each motif between pan-BC and rods, blue cones or green cones. The top motifs across the three  
535 comparisons were manually filtered for redundancy and are shown in Figure 4. Motif co-occurrence  
536 analysis was performed using a list of 66 non-redundant motifs<sup>30</sup> to which the motif for LHX3 (representing  
537 a Q50 HD motif) was manually added. For purposes of the analysis, peaks from rod, green cones and blue  
538 cones were merged to obtain a ‘photoreceptor’ peak list, while those from pan-, ON- and OFF-bipolar cells  
539 were merged to create a ‘bipolar cell’ peak list. Enrichment for co-occurrence was calculated by taking the  
540  $\log_2(\text{observed pairs}/\text{expected pairs})$ . Expected frequency of individual pairs was estimated from the  
541 frequency of each motif within the pair (peaks with motif 1  $\times$  peaks with motif 2  $\div$  number of total peaks).  
542 Motif spacing was analyzed for the top enriched peaks shown in Figure 4. The same set of peaks for co-  
543 occurrence were centered on individual K50 or Q50 motifs, and the density of flanking secondary motifs  
544 was plotted on either strand.

545

546 **Identification of differentially accessible peaks and differentially expressed genes.** DESeq2 (v1.14.1)<sup>77</sup>  
547 was used to test for differential expression or differential accessibility using a  $\log_2$  fold-change threshold  
548 of 1 and an FDR of 0.05. For comparison of ATAC-seq data with DNase-seq data from non-retinal tissues  
549 (Fig. 5), photoreceptors were collapsed into a single level. Differentially expressed genes are listed in Table

550 S5, and differentially accessible regions are listed in Table S7. For each comparison (i.e. ON versus OFF,  
551 pan-BC versus rod), gene expression stemming from low-level contamination of bipolar cell populations  
552 with either rod or cone photoreceptors was filtered out. When comparing pan-BC to photoreceptor  
553 populations, potential contaminating genes from the alternate photoreceptor type (i.e. rod genes identified  
554 as enriched in pan-BC versus blue cone) were identified as those highly expressed (>16-fold) and specific  
555 to rod compared to blue cone, and also more highly expressed in rod compared to pan-BC (at least four-  
556 fold). In comparing ON and OFF bipolar cells, genes enriched in each bipolar cell population were filtered  
557 for those which were also identified as highly specific to either photoreceptor population compared to the  
558 enriched bipolar cell type. For example, genes increased in OFF- compared to ON-bipolar cells were filtered  
559 for genes that were also highly enriched (>16-fold) in rods and blue cones compared to OFF bipolar cells.  
560 In total, 38 genes were filtered from those identified as enriched in pan-BC compared to photoreceptors,  
561 and 39 genes were filtered from the ON versus OFF comparison (12 from the ON-enriched, 27 from the  
562 OFF-enriched). These genes include those known to be expressed at very high levels in either rod or cone  
563 photoreceptors<sup>78</sup>.

564

565 **RNA isolation, qPCR and RNA-seq.** Sorted bipolar cell populations were resuspended in 500 µl TRIzol  
566 reagent (Invitrogen), and RNA was isolated according to manufacturer's instructions. Prior to sequencing,  
567 RNA quality was analyzed using an Agilent Bioanalyzer. cDNA was prepared using the SMARTer Ultra  
568 Low RNA kit for Illumina Sequencing-HV (Clontech) per manufacturer's instructions. cDNA was  
569 fragmented using a Covaris E210 sonicator using duty cycle 10, intensity 5, cycles/burst 200, time 180  
570 seconds. cDNA was blunt-ended, an 'A' base added to the 3' ends, and Illumina sequencing adapters were  
571 ligated to the ends of the cDNAs. Ligated fragments were amplified for 12 cycles using primers  
572 incorporating unique index tags. Replicate libraries from each bipolar cell population were pooled in  
573 equimolar ratios and sequenced on an Illumina HiSeq 3000 (single-end 50 bp reads). For qPCR, RNA  
574 samples were treated with TURBO DNase (Invitrogen) and cDNA was synthesized with SuperScript IV

575 (Invitrogen) and oligo(dT) primers according to manufacturer's instructions. Expression was normalized to  
576 the average of reference genes *Gapdh*, *Sdha*, *Hprt*, and *Pgk1*. Primers for *Grm6*, *Gnat1*, *Lhx1*, *Pax6*, *Rbp1*,  
577 *Slc17a6*, *Vsx2*, *Grik1*, and *Tacr3* are listed in Table S2.

578

579

580

581

582

583

584

585

586

587

588

589

590

591

592

593

594

595

596

597

598

599

600

601

602

603

604 **References**

- 605 1. Arendt, D., Hausen, H. & Purschke, G. The 'division of labour' model of eye evolution. *Philos. Trans.*  
606 *R. Soc. B Biol. Sci.* **364**, 2809–2817 (2009).
- 607 2. Brunet, T. & King, N. The Origin of Animal Multicellularity and Cell Differentiation. *Dev. Cell* **43**, 124–  
608 140 (2017).
- 609 3. Arendt, D. Evolution of eyes and photoreceptor cell types. *Int. J. Dev. Biol.* **47**, 563–571 (2003).
- 610 4. Arendt, D. *et al.* The origin and evolution of cell types. *Nat. Rev. Genet.* **17**, 744–757 (2016).
- 611 5. Arendt, D. The evolution of cell types in animals: emerging principles from molecular studies. *Nat.*  
612 *Rev. Genet.* **9**, 868–882 (2008).
- 613 6. Lamb, T. D. Evolution of phototransduction, vertebrate photoreceptors and retina. *Prog. Retin. Eye*  
614 *Res.* **36**, 52–119 (2013).
- 615 7. Euler, T., Haverkamp, S., Schubert, T. & Baden, T. Retinal bipolar cells: elementary building blocks of  
616 vision. *Nat. Rev. Neurosci.* **15**, 507–519 (2014).
- 617 8. Koike, C. *et al.* Functional Roles of Otx2 Transcription Factor in Postnatal Mouse Retinal  
618 Development. *Mol. Cell. Biol.* **27**, 8318–8329 (2007).
- 619 9. Wang, S., Sengel, C., Emerson, M. M. & Cepko, C. L. A gene regulatory network controls the binary  
620 fate decision of rod and bipolar cells in the vertebrate retina. *Dev. Cell* **30**, 513–527 (2014).
- 621 10. Emerson, M. M., Surzenko, N., Goetz, J. J., Trimarchi, J. & Cepko, C. L. Otx2 and Onecut1 Promote  
622 the Fates of Cone Photoreceptors and Horizontal Cells and Repress Rod Photoreceptors. *Dev. Cell*  
623 **26**, 59–72 (2013).
- 624 11. tom Dieck, S. & Brandstätter, J. H. Ribbon synapses of the retina. *Cell Tissue Res.* **326**, 339–346  
625 (2006).
- 626 12. Tauchi, M. Single cell shape and population densities of indoleamine-accumulating and displaced  
627 bipolar cells in Reeves' turtle retina. *Proc. R. Soc. Lond. B Biol. Sci.* **238**, 351–367 (1990).

- 628 13. Hendrickson, A. Landolt's Club in the Amphibian Retina: A Golgi and Electron Microscope Study.  
629 *Invest. Ophthalmol. Vis. Sci.* **5**, 484–496 (1966).
- 630 14. Lockett, N. A. Landolt's club in the retina of the african lungfish, *Protopterus aethiopicus*, heckel.  
631 *Vision Res.* **10**, 299–VI (1970).
- 632 15. Quesada, A. & Génis-Gálvez, J. M. Morphological and structural study of Landolt's club in the chick  
633 retina. *J. Morphol.* **184**, 205–214 (1985).
- 634 16. Omori, Y. *et al.* Analysis of Transcriptional Regulatory Pathways of Photoreceptor Genes by  
635 Expression Profiling of the Otx2-Deficient Retina. *PLOS ONE* **6**, e19685 (2011).
- 636 17. Nishida, A. *et al.* Otx2 homeobox gene controls retinal photoreceptor cell fate and pineal gland  
637 development. *Nat. Neurosci.* **6**, 1255 (2003).
- 638 18. Hennig, A. K., Peng, G.-H. & Chen, S. Regulation of photoreceptor gene expression by Crx-associated  
639 transcription factor network. *Brain Res.* **1192**, 114–133 (2008).
- 640 19. Corbo, J. C. *et al.* CRX ChIP-seq reveals the cis-regulatory architecture of mouse photoreceptors.  
641 *Genome Res.* **20**, 1512–1525 (2010).
- 642 20. Livne-Bar, I. *et al.* Chx10 is required to block photoreceptor differentiation but is dispensable for  
643 progenitor proliferation in the postnatal retina. *Proc. Natl. Acad. Sci. U. S. A.* **103**, 4988–4993 (2006).
- 644 21. Liu, I. S. C. *et al.* Developmental expression of a novel murine homeobox gene (Chx10): Evidence for  
645 roles in determination of the neuroretina and inner nuclear layer. *Neuron* **13**, 377–393 (1994).
- 646 22. Trelisman, J., Gönczy, P., Vashishtha, M., Harris, E. & Desplan, C. A single amino acid can determine  
647 the DNA binding specificity of homeodomain proteins. *Cell* **59**, 553–562 (1989).
- 648 23. Noyes, M. B. *et al.* Analysis of homeodomain specificities allows the family-wide prediction of  
649 preferred recognition sites. *Cell* **133**, 1277–1289 (2008).
- 650 24. Berger, M. F. *et al.* Variation in Homeodomain DNA Binding Revealed by High-Resolution Analysis of  
651 Sequence Preferences. *Cell* **133**, 1266–1276 (2008).

- 652 25. Tomita, K., Moriyoshi, K., Nakanishi, S., Guillemot, F. & Kageyama, R. Mammalian achaete–scute and  
653 atonal homologs regulate neuronal versus glial fate determination in the central nervous system.  
654 *EMBO J.* **19**, 5460–5472 (2000).
- 655 26. Bramblett, D. E., Pennesi, M. E., Wu, S. M. & Tsai, M.-J. The Transcription Factor Bhlhb4 Is Required  
656 for Rod Bipolar Cell Maturation. *Neuron* **43**, 779–793 (2004).
- 657 27. Feng, L. *et al.* Requirement for Bhlhb5 in the specification of amacrine and cone bipolar subtypes in  
658 mouse retina. *Dev. Camb. Engl.* **133**, 4815–4825 (2006).
- 659 28. Huang, L. *et al.* Bhlhb5 is Required for the Subtype Development of Retinal Amacrine and Bipolar  
660 Cells in Mice. *Dev. Dyn. Off. Publ. Am. Assoc. Anat.* **243**, 279–289 (2014).
- 661 29. Pennesi, M. E. *et al.* BETA2/NeuroD1 null mice: a new model for transcription factor-dependent  
662 photoreceptor degeneration. *J. Neurosci. Off. J. Soc. Neurosci.* **23**, 453–461 (2003).
- 663 30. Hughes, A. E. O., Enright, J. M., Myers, C. A., Shen, S. Q. & Corbo, J. C. Cell Type-Specific Epigenomic  
664 Analysis Reveals a Uniquely Closed Chromatin Architecture in Mouse Rod Photoreceptors. *Sci. Rep.*  
665 **7**, (2017).
- 666 31. Hughes, A. E. O., Myers, C. A. & Corbo, J. C. A massively parallel reporter assay reveals context-  
667 dependent activity of homeodomain binding sites in vivo. *Genome Res.* **28**, 1520–1531 (2018).
- 668 32. Irie, S. *et al.* Rax Homeoprotein Regulates Photoreceptor Cell Maturation and Survival in Association  
669 with Crx in the Postnatal Mouse Retina. *Mol. Cell. Biol.* **35**, 2583–2596 (2015).
- 670 33. Kimura, A. *et al.* Both PCE-1/RX and OTX/CRX Interactions Are Necessary for Photoreceptor-specific  
671 Gene Expression. *J. Biol. Chem.* **275**, 1152–1160 (2000).
- 672 34. Dorval, K. M. *et al.* CHX10 targets a subset of photoreceptor genes. *J. Biol. Chem.* **281**, 744–751  
673 (2006).
- 674 35. Clark, A. M. *et al.* Negative Regulation of Vsx1 by its Paralog Chx10/Vsx2 is Conserved in the  
675 Vertebrate Retina. *Brain Res.* **1192**, 99–113 (2008).

- 676 36. Rister, J. *et al.* Single-base pair differences in a shared motif determine differential Rhodopsin  
677 expression. *Science* **350**, 1258–1261 (2015).
- 678 37. Fossat, N. *et al.* A new GFP-tagged line reveals unexpected Otx2 protein localization in retinal  
679 photoreceptors. *BMC Dev. Biol.* **7**, 122 (2007).
- 680 38. Schubert, T. *et al.* Development of Presynaptic Inhibition Onto Retinal Bipolar Cell Axon Terminals Is  
681 Subclass-Specific. *J. Neurophysiol.* **100**, 304–316 (2008).
- 682 39. Daniele, L. L. *et al.* Cone-like Morphological, Molecular, and Electrophysiological Features of the  
683 Photoreceptors of the Nrl Knockout Mouse. *Invest. Ophthalmol. Vis. Sci.* **46**, 2156–2167 (2005).
- 684 40. Nikonov, S. S. *et al.* Photoreceptors of Nrl  $-/-$  Mice Coexpress Functional S- and M-cone Opsins  
685 Having Distinct Inactivation Mechanisms. *J. Gen. Physiol.* **125**, 287–304 (2005).
- 686 41. Macosko, E. Z. *et al.* Highly Parallel Genome-wide Expression Profiling of Individual Cells Using  
687 Nanoliter Droplets. *Cell* **161**, 1202–1214 (2015).
- 688 42. Thomas, P. D. *et al.* PANTHER: a library of protein families and subfamilies indexed by function.  
689 *Genome Res.* **13**, 2129–2141 (2003).
- 690 43. Hu, H. *et al.* AnimalTFDB 3.0: a comprehensive resource for annotation and prediction of animal  
691 transcription factors. *Nucleic Acids Res.* **47**, D33–D38 (2019).
- 692 44. Shekhar, K. *et al.* Comprehensive Classification of Retinal Bipolar Neurons by Single-Cell  
693 Transcriptomics. *Cell* **166**, 1308-1323.e30 (2016).
- 694 45. Buenrostro, J. D., Giresi, P. G., Zaba, L. C., Chang, H. Y. & Greenleaf, W. J. Transposition of native  
695 chromatin for fast and sensitive epigenomic profiling of open chromatin, DNA-binding proteins and  
696 nucleosome position. *Nat. Methods* **10**, 1213–1218 (2013).
- 697 46. ENCODE Project Consortium. An integrated encyclopedia of DNA elements in the human genome.  
698 *Nature* **489**, 57–74 (2012).



- 699 47. Heinz, S. *et al.* Simple combinations of lineage-determining transcription factors prime cis-  
700 regulatory elements required for macrophage and B cell identities. *Mol. Cell* **38**, 576–589 (2010).
- 701 48. Song, L. *et al.* Open chromatin defined by DNaseI and FAIRE identifies regulatory elements that  
702 shape cell-type identity. *Genome Res.* **21**, 1757–1767 (2011).
- 703 49. Splinter, E. *et al.* CTCF mediates long-range chromatin looping and local histone modification in the  
704 beta-globin locus. *Genes Dev.* **20**, 2349–2354 (2006).
- 705 50. Rao, S. S. P. *et al.* A 3D map of the human genome at kilobase resolution reveals principles of  
706 chromatin looping. *Cell* **159**, 1665–1680 (2014).
- 707 51. Pastor, W. A. *et al.* MORC1 represses transposable elements in the mouse male germline. *Nat.*  
708 *Commun.* **5**, (2014).
- 709 52. Ampuja, M. *et al.* Integrated RNA-seq and DNase-seq analyses identify phenotype-specific BMP4  
710 signaling in breast cancer. *BMC Genomics* **18**, (2017).
- 711 53. Nie, Z., Chen, S., Kumar, R. & Zack, D. J. RER, an evolutionarily conserved sequence upstream of the  
712 rhodopsin gene, has enhancer activity. *J. Biol. Chem.* **271**, 2667–2675 (1996).
- 713 54. Kim, D. S., Matsuda, T. & Cepko, C. L. A Core Paired-Type and POU Homeodomain-Containing  
714 Transcription Factor Program Drives Retinal Bipolar Cell Gene Expression. *J. Neurosci. Off. J. Soc.*  
715 *Neurosci.* **28**, 7748–7764 (2008).
- 716 55. McLean, C. Y. *et al.* GREAT improves functional interpretation of cis-regulatory regions. *Nat.*  
717 *Biotechnol.* **28**, 495–501 (2010).
- 718 56. Haider, N. B. *et al.* Nr2e3-Directed Transcriptional Regulation of Genes Involved in Photoreceptor  
719 Development and Cell-Type Specific Phototransduction. *Exp. Eye Res.* **89**, 365–372 (2009).
- 720 57. Corbo, J. C. & Cepko, C. L. A Hybrid Photoreceptor Expressing Both Rod and Cone Genes in a Mouse  
721 Model of Enhanced S-Cone Syndrome. *PLoS Genet.* **1**, (2005).

- 722 58. Clovis, Y. M. *et al.* Chx10 Consolidates V2a Interneuron Identity through Two Distinct Gene  
723 Repression Modes. *Cell Rep.* **16**, 1642–1652 (2016).
- 724 59. Young, H. M. & Vaney, D. I. The retinae of Prototherian mammals possess neuronal types that are  
725 characteristic of non-mammalian retinae. *Vis. Neurosci.* **5**, 61–66 (1990).
- 726 60. Rowan, S. & Cepko, C. L. Genetic analysis of the homeodomain transcription factor Chx10 in the  
727 retina using a novel multifunctional BAC transgenic mouse reporter. *Dev. Biol.* **271**, 388–402 (2004).
- 728 61. Rodgers, H. M., Huffman, V. J., Voronina, V. A., Lewandoski, M. & Mathers, P. H. The role of the Rx  
729 homeobox gene in retinal progenitor proliferation and cell fate specification. *Mech. Dev.* **151**, 18–29  
730 (2018).
- 731 62. Locket, N. A. & Jørgensen, J. M. The Eyes of Hagfishes. in *The Biology of Hagfishes* (eds. Jørgensen, J.  
732 M., Lomholt, J. P., Weber, R. E. & Malte, H.) 541–556 (Springer Netherlands, 1998).  
733 doi:10.1007/978-94-011-5834-3\_34
- 734 63. Eakin, R. M. *The Third Eye*. (Berkeley: University of California Press, 1973).
- 735 64. Dodt, E. The Parietal Eye (Pineal and Parietal Organs) of Lower Vertebrates. in *Visual Centers in the*  
736 *Brain* (eds. Berlucchi, G. et al.) 113–140 (Springer Berlin Heidelberg, 1973). doi:10.1007/978-3-642-  
737 65495-4\_4
- 738 65. Mano, H. & Fukada, Y. A median third eye: pineal gland retraces evolution of vertebrate  
739 photoreceptive organs. *Photochem. Photobiol.* **83**, 11–18 (2007).
- 740 66. Solessio, E. & Engbretson, G. A. Antagonistic chromatic mechanisms in photoreceptors of the  
741 parietal eye of lizards. *Nature* **364**, 442 (1993).
- 742 67. Trimarchi, J. M. *et al.* Molecular heterogeneity of developing retinal ganglion and amacrine cells  
743 revealed through single cell gene expression profiling. *J. Comp. Neurol.* **502**, 1047–1065 (2007).
- 744 68. Ho, S. N., Hunt, H. D., Horton, R. M., Pullen, J. K. & Pease, L. R. Site-directed mutagenesis by overlap  
745 extension using the polymerase chain reaction. *Gene* **77**, 51–59 (1989).

- 746 69. Hsiao, T. H.-C. *et al.* The Cis-regulatory Logic of the Mammalian Photoreceptor Transcriptional  
747 Network. *PLoS ONE* **2**, (2007).
- 748 70. Matsuda, T. & Cepko, C. L. Electroporation and RNA interference in the rodent retina in vivo and in  
749 vitro. *Proc. Natl. Acad. Sci.* **101**, 16–22 (2004).
- 750 71. Buenrostro, J., Wu, B., Chang, H. & Greenleaf, W. ATAC-seq: A Method for Assaying Chromatin  
751 Accessibility Genome-Wide. *Curr. Protoc. Mol. Biol. Ed. Frederick M Ausubel Al* **109**, 21.29.1-21.29.9  
752 (2015).
- 753 72. Langmead, B. & Salzberg, S. L. Fast gapped-read alignment with Bowtie 2. *Nat. Methods* **9**, 357–359  
754 (2012).
- 755 73. Li, H. *et al.* The Sequence Alignment/Map format and SAMtools. *Bioinformatics* **25**, 2078–2079  
756 (2009).
- 757 74. Zhang, Y. *et al.* Model-based Analysis of ChIP-Seq (MACS). *Genome Biol.* **9**, R137 (2008).
- 758 75. Dobin, A. *et al.* STAR: ultrafast universal RNA-seq aligner. *Bioinforma. Oxf. Engl.* **29**, 15–21 (2013).
- 759 76. Anders, S., Pyl, P. T. & Huber, W. HTSeq--a Python framework to work with high-throughput  
760 sequencing data. *Bioinforma. Oxf. Engl.* **31**, 166–169 (2015).
- 761 77. Love, M. I., Huber, W. & Anders, S. Moderated estimation of fold change and dispersion for RNA-seq  
762 data with DESeq2. *Genome Biol.* **15**, 550 (2014).
- 763 78. Corbo, J. C., Myers, C. A., Lawrence, K. A., Jadhav, A. P. & Cepko, C. L. A typology of photoreceptor  
764 gene expression patterns in the mouse. *Proc. Natl. Acad. Sci. U. S. A.* **104**, 12069–12074 (2007).
- 765
